# Supplementary material for: Waste corn-cob cellulose supported bio-heterogeneous copper nanoparticles for aza-Michael reactions
Source: Royal Society of Chemistry journal article supplement (doi:10.1039/c5nj02437d), 2015-11-04

# Waste Corn-cob Cellulose Supported Bio-Heterogeneous Copper Nanoparticles for Aza-Michael Reactions

Shaheen M. Sarkar\*, Tahnim Sultana, Tapan Kumar Biswas, Md. Lutfor Rahman\*, Mashitah Mohd Yusoff

*Faculty of Industrial Sciences & Technology, University Malaysia Pahang, 26300 Gambang, Kuantan, Pahang, Malaysia. Fax: +609 5492766; Tel: +609 5492399; E-mail: sha\_inha@yahoo.com; shaheen@ump.edu.my*

## Supporting information

### Characterization of Aza-Michael Products

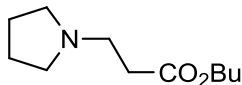

<sup>1</sup>H NMR (CDCl<sub>3</sub>, 500 MHz) δ 4.08 (t, *J* = 5.0 Hz, 2 H), 2.77 (t, *J* = 5.0 Hz, 2 H), 2.055-2.48 (m, 6 H), 1.80-1.62 (m, 4 H), 1.64-1.57 (m, 2 H), 1.42-1.35 (m, 2 H), 0.94 (t, *J* = 5.0 Hz, 3 H). <sup>13</sup>C NMR (CDCl<sub>3</sub>, 125 MHz) δ 172.38, 64.08, 53.84, 51.28, 34.05, 30.53, 23.32, 18.98, 13.55. MS-EI, *m/z* 199 (M<sup>+</sup>).

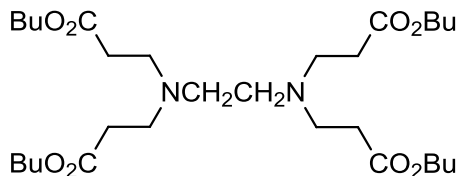

<sup>1</sup>H NMR (CDCl<sub>3</sub>, 500 MHz) δ 4.06 (t, *J* = 7.0 Hz, 8 H), 2.77 (t, *J* = 7.0 Hz, 8 H), 2.52 (m, 4 H), 2.27-2.40 (m, 8 H), 1.67-1.57 (m, 8 H), 1.43-1.34 (m, 8 H), 0.93 (t, *J* = 7.0 Hz, 12 H). <sup>13</sup>C NMR (CDCl<sub>3</sub>, 125 MHz) δ 172.03, 63.72, 51.97, 49.52, 32.43, 30.37, 18.80, 13.32. MS-EI, *m/z* 572 (M<sup>+</sup>).

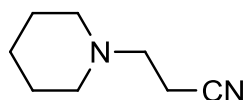

$^1\text{H}$  NMR ( $\text{CDCl}_3$ , 500 MHz)  $\delta$  2.68 (t,  $J = 7.0$  Hz, 2 H), 2.50 (t,  $J = 7.0$  Hz, 2 H), 2.45-2.39 (m, 4 H), 1.62-1.56 (m, 4 H), 1.44-1.41 (m, 2 H).  $^{13}\text{C}$  NMR ( $\text{CDCl}_3$ , 125 MHz)  $\delta$  119.13, 54.19, 25.86, 24.13, 15.69. MS-EI,  $m/z$  138 ( $\text{M}^+$ ).

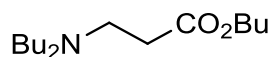

$^1\text{H}$  NMR ( $\text{CDCl}_3$ , 500 MHz)  $\delta$  4.07 (t,  $J = 7.0$  Hz, 2 H), 2.78 (t,  $J = 7.0$  Hz, 2 H), 2.45-2.37 (m, 6 H), 1.63-1.57 (m, 2 H), 1.45-1.41 (m, 6 H), 1.35-1.26 (m, 4 H), 0.93 (t,  $J = 7.0$  Hz, 9 H).  $^{13}\text{C}$  NMR ( $\text{CDCl}_3$ , 125 MHz)  $\delta$  172.89, 53.65, 49.49, 32.48, 30.71, 29.34, 20.60, 19.15, 13.99, 13.65. MS-EI,  $m/z$  157 ( $\text{M}^+$ ).

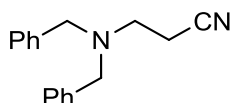

$^1\text{H}$  NMR ( $\text{CDCl}_3$ , 500 MHz)  $\delta$  7.38 (dd,  $J = 7.5$  Hz, 4 H), 7.32 (dd,  $J = 7.5$  Hz, 4 H), 7.24 (dd,  $J = 7.5$  Hz, 2 H), 2.77 (t,  $J = 7.0$  Hz, 2 H), 2.37 (t,  $J = 7.0$  Hz, 2 H).  $^{13}\text{C}$  NMR ( $\text{CDCl}_3$ , 125 MHz)  $\delta$  138.48, 128.60, 128.48, 128.30, 127.16, 118.75, 57.99, 48.56, 16.12. MS-EI,  $m/z$  250 ( $\text{M}^+$ ).

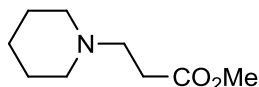

$^1\text{H}$  NMR ( $\text{CDCl}_3$ , 500 MHz)  $\delta$  3.67 (s, 3 H), 2.66 (t,  $J = 7.0$  Hz, 2 H), 2.54-2.50 (m, 2 H), 2.43-2.36 (m, 4 H), 1.61-1.54 (m, 4 H), 1.41-1.40 (m, 2 H).  $^{13}\text{C}$  NMR ( $\text{CDCl}_3$ , 125 MHz)  $\delta$  173.28, 54.35, 53.30, 51.71, 32.08, 25.97, 24.35. MS-EI,  $m/z$  171 ( $\text{M}^+$ ).

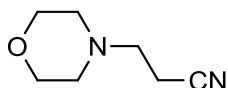

$^1\text{H}$  NMR ( $\text{CDCl}_3$ , 500 MHz)  $\delta$  3.71 (t,  $J = 7.0$  Hz, 4 H), 2.67 (t,  $J = 7.0$  Hz, 2 H), 2.55-2.47 (m, 6 H).  $^{13}\text{C}$  NMR ( $\text{CDCl}_3$ , 125 MHz)  $\delta$  118.61, 66.52, 53.42, 52.86, 15.48. MS-EI,  $m/z$  140 ( $\text{M}^+$ ).

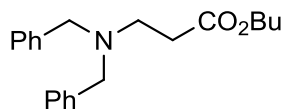

$^1\text{H}$  NMR ( $\text{CDCl}_3$ , 500 MHz)  $\delta$  7.32 (dd,  $J = 7.5$  Hz, 4 H), 7.28 (dd,  $J = 7.5$  Hz, 4 H), 7.20 (dd,  $J = 7.5$  Hz, 2 H), 4.00 (t,  $J = 7.0$  Hz, 2 H), 3.54 (s, 4 H), 2.79 (t,  $J = 7.0$  Hz, 2 H), 2.47 (t,  $J = 7.0$  Hz, 2 H), 1.54-1.47 (m, 2 H), 1.34-1.28 (m, 2 H), 0.89 (t,  $J = 7.0$  Hz, 3 H).  $^{13}\text{C}$  NMR ( $\text{CDCl}_3$ , 125 MHz)  $\delta$  172.30, 139.19, 128.68, 128.09, 126.84, 64.02, 57.95, 49.17, 32.71, 30.53, 19.04, 13.64. MS-EI,  $m/z$  325 ( $\text{M}^+$ ).

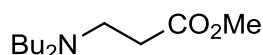

$^1\text{H}$  NMR ( $\text{CDCl}_3$ , 500 MHz)  $\delta$  3.66 (s, 3 H), 2.77 (t,  $J = 7.0$  Hz, 2 H), 2.42 (t,  $J = 7.0$  Hz, 2 H), 2.39 (t,  $J = 7.0$  Hz, 4 H), 1.44-1.38 (m, 4 H), 1.32-1.28 (m, 4 H), 0.90 (t,  $J = 7.0$  Hz, 6 H).  $^{13}\text{C}$  NMR ( $\text{CDCl}_3$ , 125 MHz)  $\delta$  173.16, 53.60, 51.29, 49.36, 32.24, 29.26, 20.53, 13.98. MS-EI,  $m/z$  215 ( $\text{M}^+$ ).

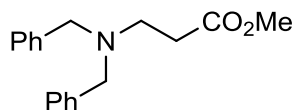

$^1\text{H}$  NMR ( $\text{CDCl}_3$ , 500 MHz)  $\delta$  7.33-7.27 (m, 8 H), 7.21 (dd,  $J = 7.5$  Hz, 2 H), 3.59 (s, 3 H), 3.55 (s, 4 H), 2.78 (t,  $J = 7.0$  Hz, 2 H), 2.48 (t,  $J = 7.0$  Hz, 2 H).  $^{13}\text{C}$  NMR ( $\text{CDCl}_3$ , 125 MHz)  $\delta$  172.48, 139.14, 128.62, 128.05, 126.81, 57.91, 51.10, 48.99, 32.47. MS-EI,  $m/z$  283 ( $\text{M}^+$ ).

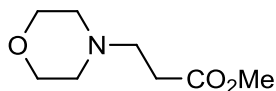

$^1\text{H}$  NMR ( $\text{CDCl}_3$ , 500 MHz)  $\delta$  3.66 (s, 7 H), 2.68 (t,  $J = 7.0$  Hz, 2 H), 2.51 (t,  $J = 7.0$  Hz, 2 H), 2.47-2.44 (m, 4 H).  $^{13}\text{C}$  NMR ( $\text{CDCl}_3$ , 125 MHz)  $\delta$  172.50, 66.62, 53.73, 53.20, 51.36, 31.64. MS-EI,  $m/z$  173 ( $\text{M}^+$ ).

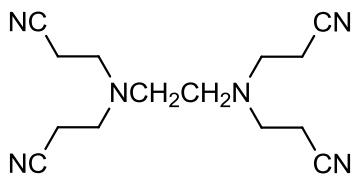

$^1\text{H}$  NMR ( $\text{CDCl}_3$ , 500 MHz)  $\delta$  2.92 (t,  $J = 7.0$  Hz, 4 H), 2.85 (t,  $J = 7.0$  Hz, 4 H), 2.70 (s, 4 H), 2.53 (t,  $J = 7.0$  Hz, 8 H).  $^{13}\text{C}$  NMR ( $\text{CDCl}_3$ , 125 MHz)  $\delta$  118.93, 52.92, 52.31, 49.27, 48.00, 46.38, 44.85, 44.62, 18.46, 16.82. MS-EI,  $m/z$  272 ( $\text{M}^+$ ).

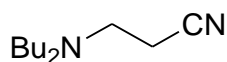

$^1\text{H}$  NMR ( $\text{CDCl}_3$ , 500 MHz)  $\delta$  2.77 (t,  $J = 7.0$  Hz, 2 H), 2.44-2.40 (m, 6 H), 1.44-1.39 (m, 4 H), 1.38-1.29 (m, 4 H), 0.91 (t,  $J = 7.0$  Hz, 6 H).  $^{13}\text{C}$  NMR ( $\text{CDCl}_3$ , 125 MHz)  $\delta$  119.05, 53.45, 49.57, 29.44, 20.38, 16.12, 13.90. MS-EI,  $m/z$  182 ( $\text{M}^+$ ).

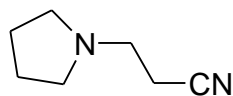

$^1\text{H}$  NMR ( $\text{CDCl}_3$ , 500 MHz)  $\delta$  2.78 (t,  $J = 7.0$  Hz, 2 H), 2.58-2.52 (m, 6 H), 1.80-1.77 (m, 4 H).  $^{13}\text{C}$  NMR ( $\text{CDCl}_3$ , 125 MHz)  $\delta$  119.02, 53.97, 51.45, 23.69, 17.74. MS-EI,  $m/z$  124 ( $\text{M}^+$ ).

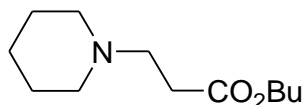

$^1\text{H}$  NMR ( $\text{CDCl}_3$ , 500 MHz)  $\delta$  4.08 (t,  $J = 7.0$  Hz, 2 H), 2.65 (t,  $J = 7.0$  Hz, 2 H), 2.50 (t,  $J = 7.0$  Hz, 2 H), 2.45-2.33 (m, 4 H), 1.62-1.55 (m, 6 H), 1.42-1.36 (m, 4 H), 0.91 (t,  $J = 7.0$  Hz, 3 H).  $^{13}\text{C}$  NMR ( $\text{CDCl}_3$ , 125 MHz)  $\delta$  172.18, 63.31, 53.44, 31.44, 29.82, 25.03, 23.42, 18.25, 12.80. MS-EI,  $m/z$  213 ( $\text{M}^+$ ).

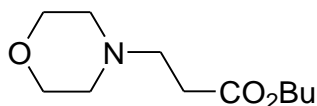

$^1\text{H}$  NMR ( $\text{CDCl}_3$ , 500 MHz)  $\delta$  4.09 (t,  $J = 7.0$  Hz, 2 H), 3.69 (t,  $J = 7.0$  Hz, 4 H), 2.68 (t,  $J = 7.0$  Hz, 2 H), 2.52-2.44 (m, 6 H), 1.63-1.57 (m, 2 H), 1.42-1.36 (m, 2 H), 0.93 (t,  $J = 7.0$  Hz, 3 H).  $^{13}\text{C}$  NMR ( $\text{CDCl}_3$ , 125 MHz)  $\delta$  171.96, 66.52, 63.86, 53.73, 53.12, 31.85, 30.40, 18.81, 13.38. MS-EI,  $m/z$  215 ( $\text{M}^+$ ).

sample 1  
proton  
cdcl3

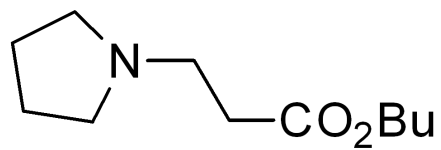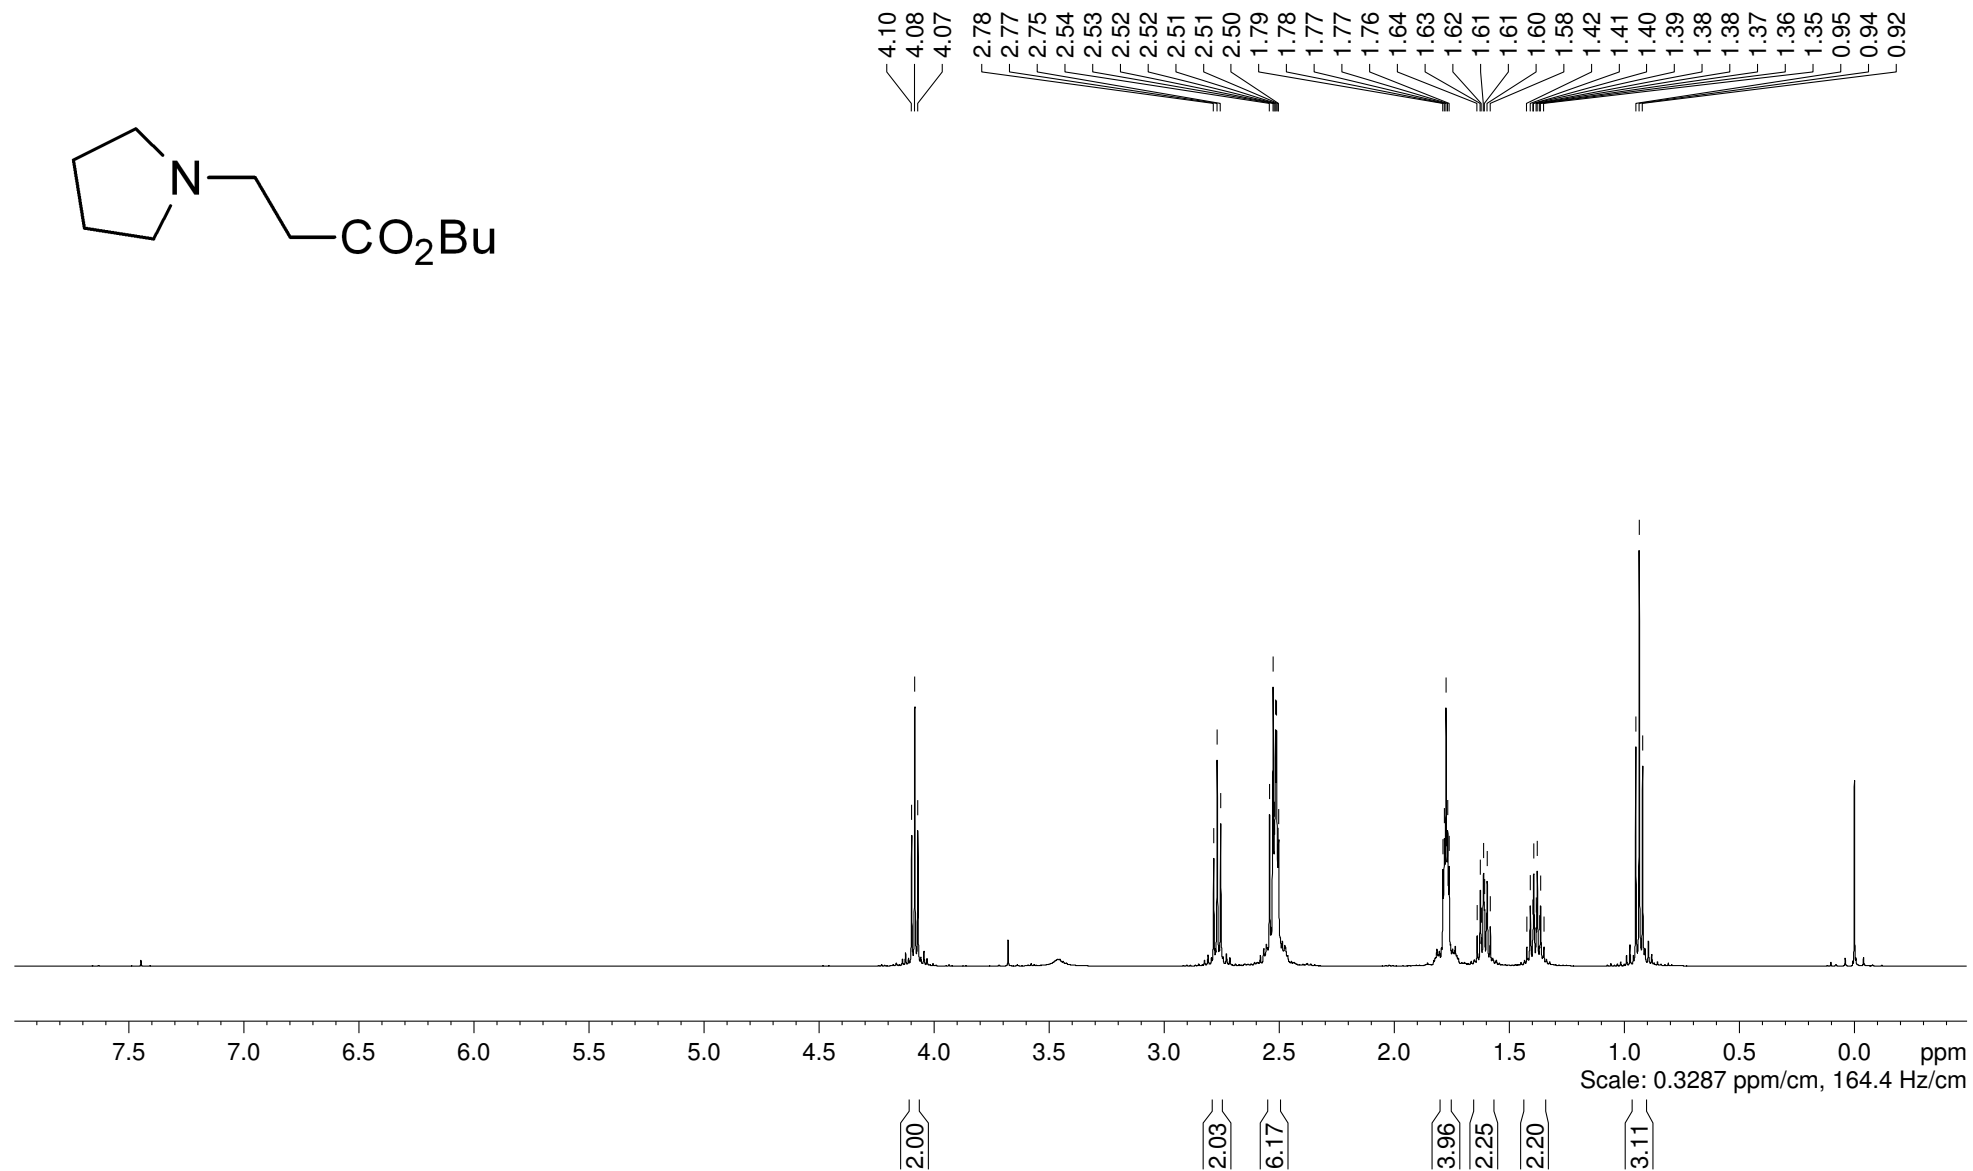

sample 1  
C13  
cdcl3

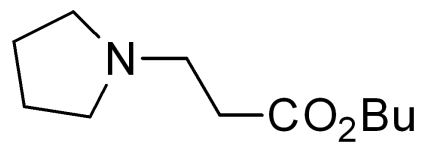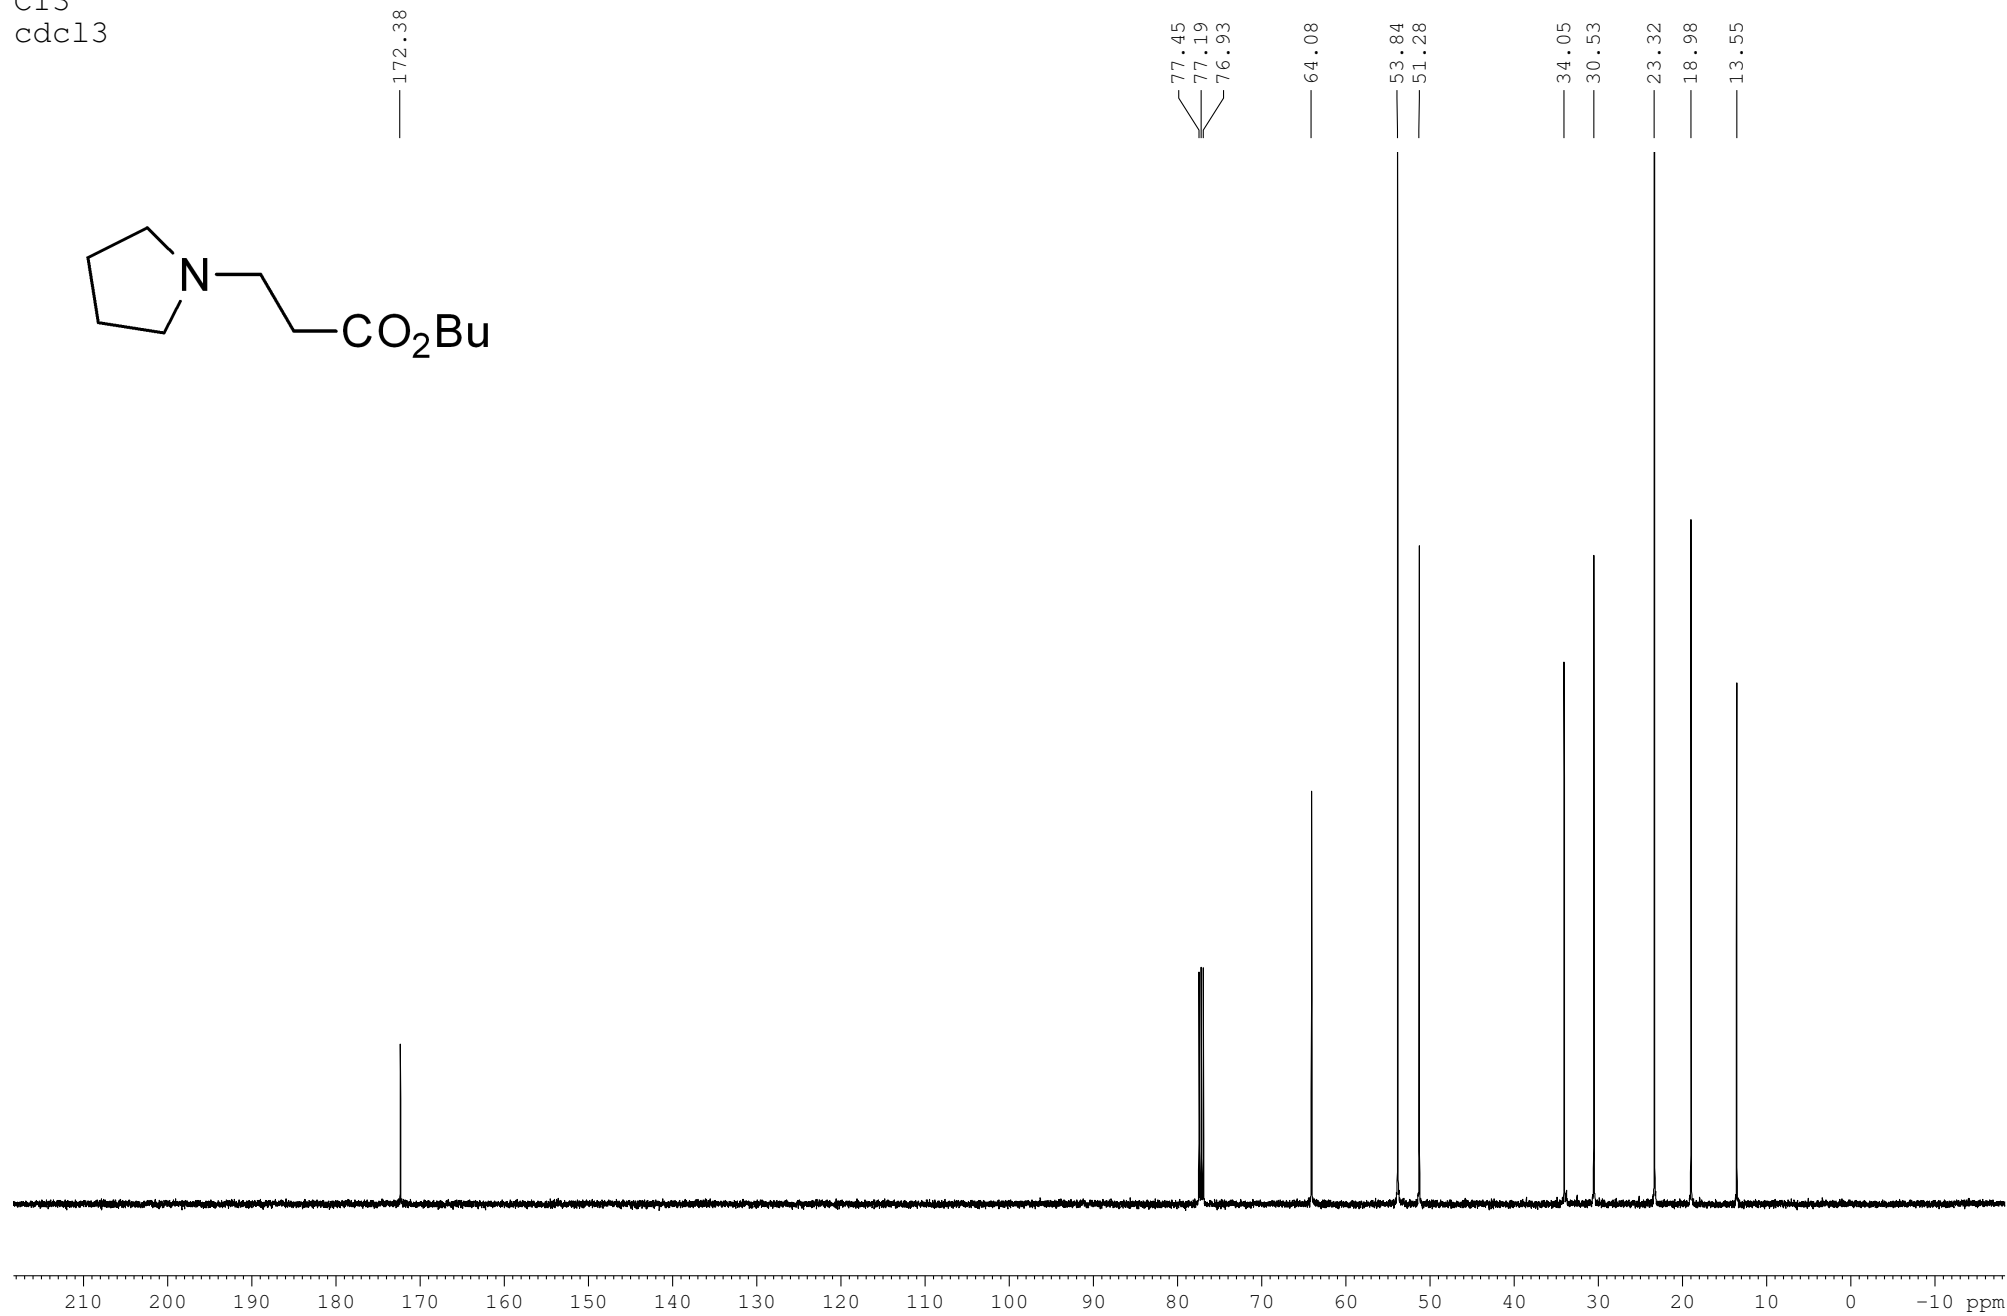

sample 2  
proton  
cdcl3

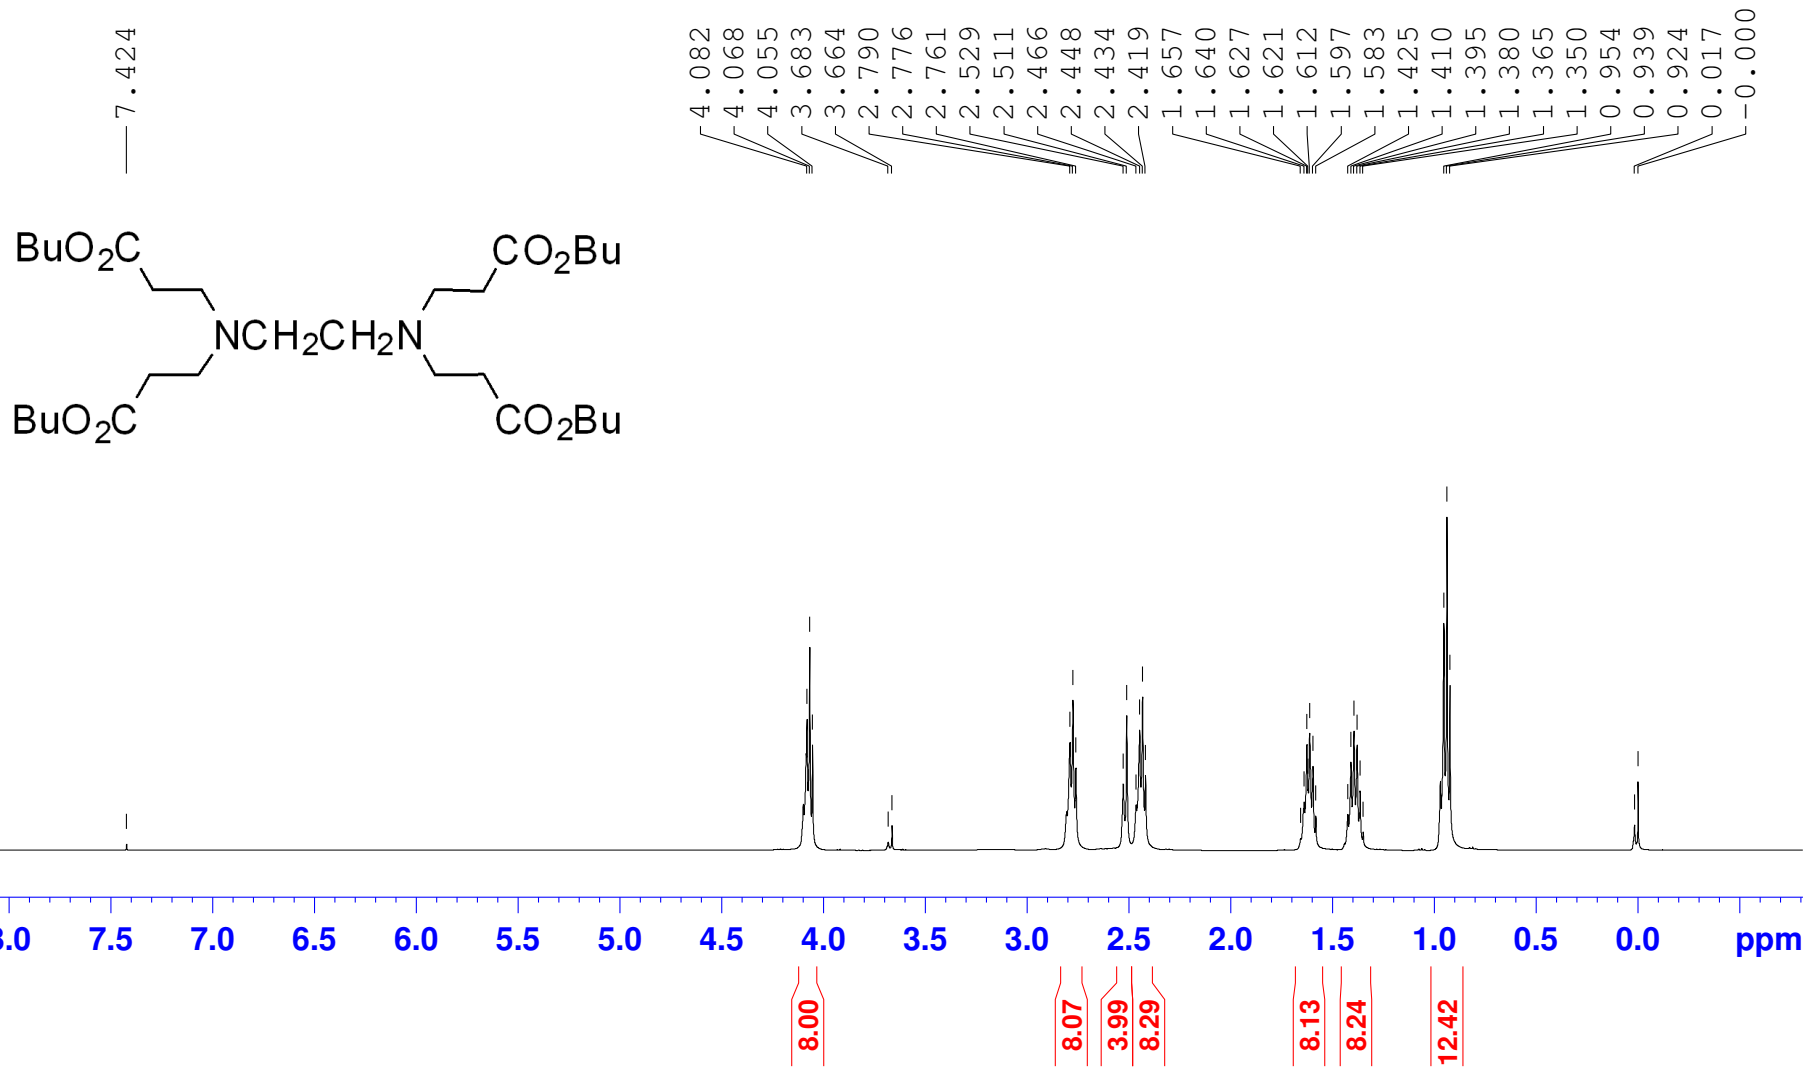

sample 2  
C13  
cdcl3

172.03

77.48  
77.23  
76.97

63.72

51.97  
49.52

32.43  
30.37

18.80

13.32

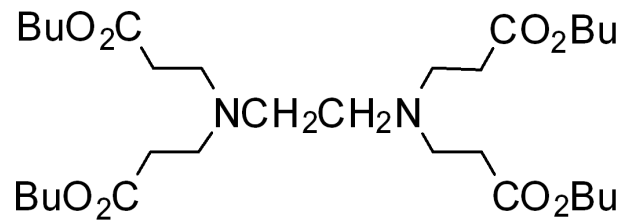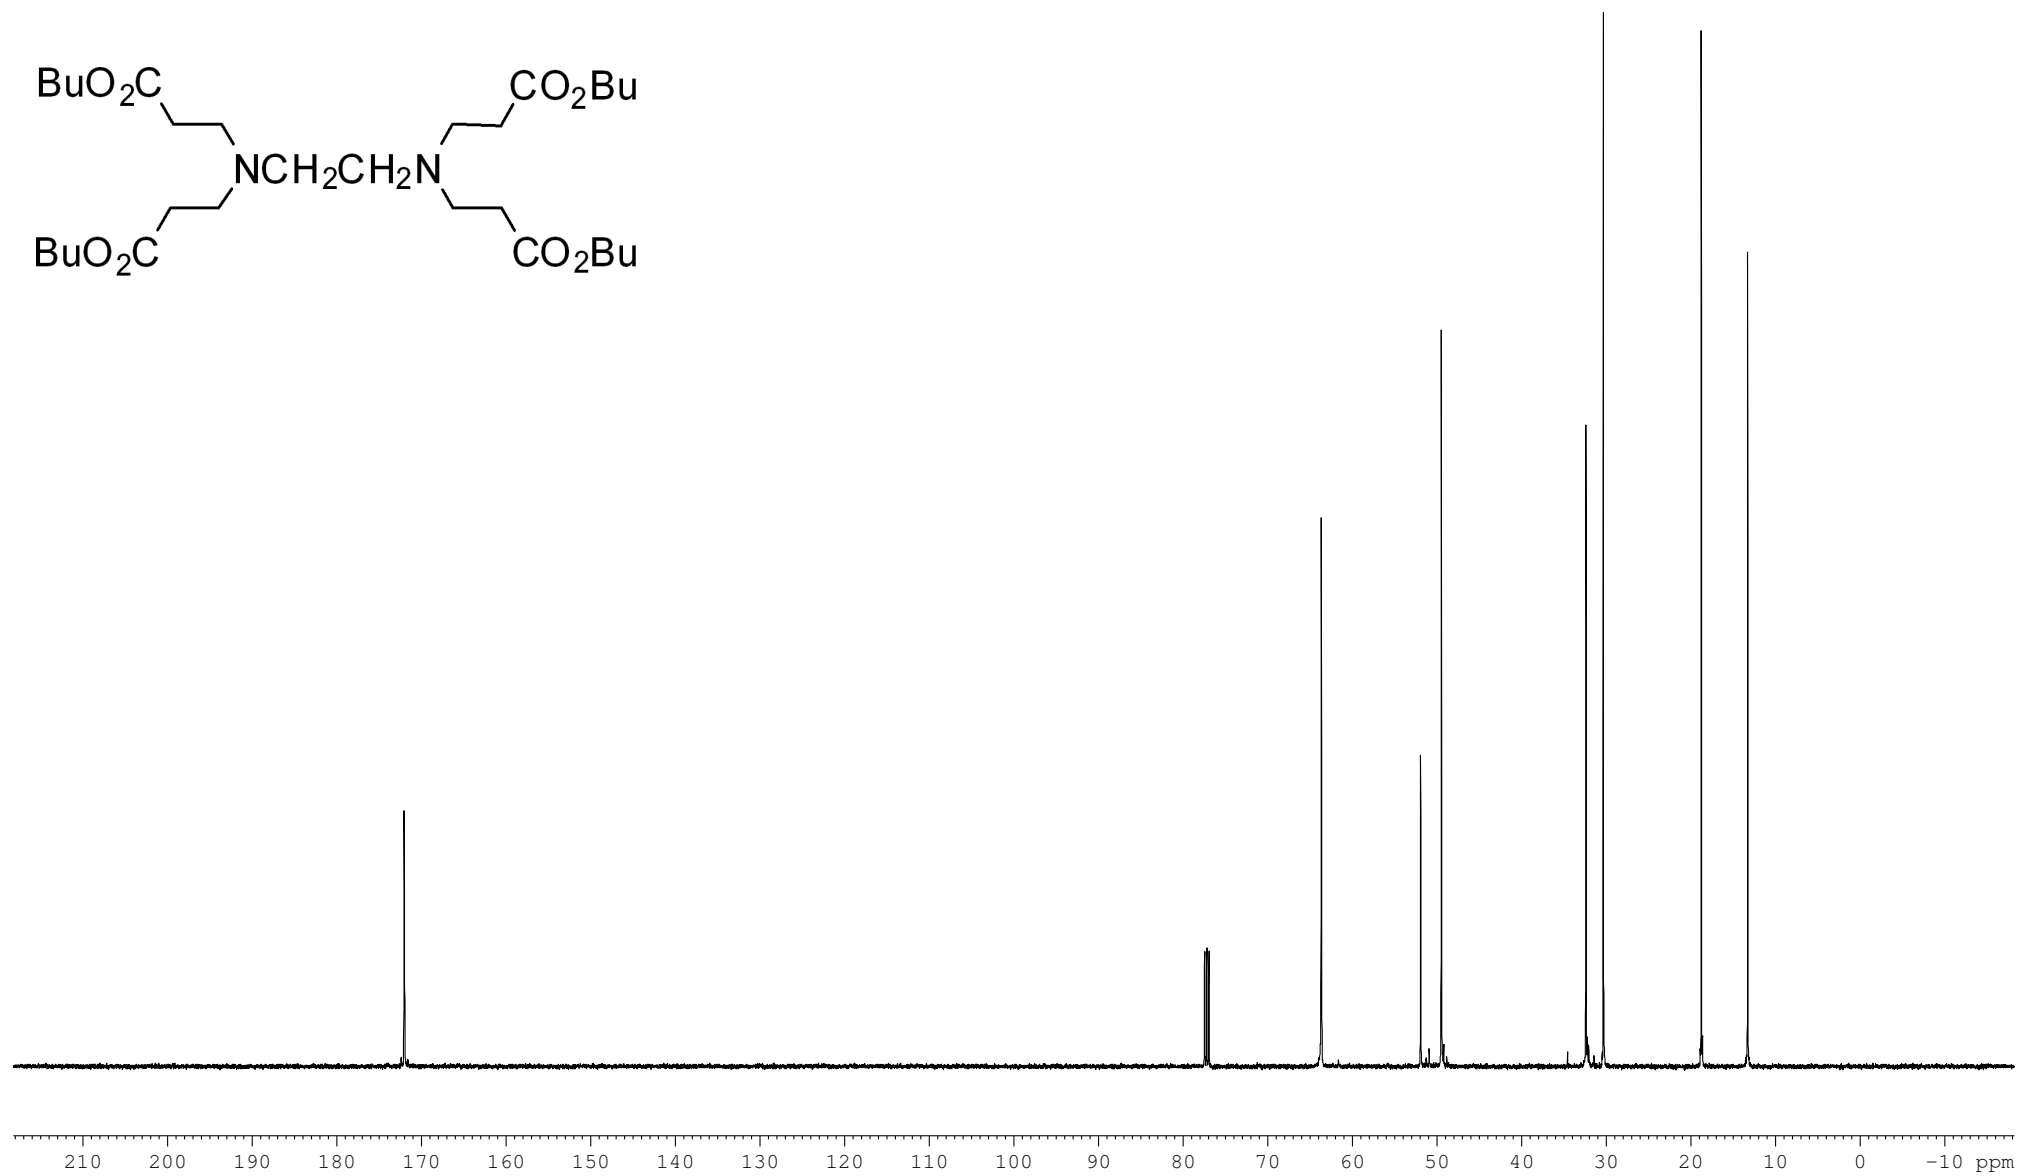



sample 3  
proton  
cdcl3

7.334  
7.331  
7.317  
7.302  
7.298  
7.287  
7.285  
7.275  
7.272  
7.229  
7.226  
7.222  
7.211  
7.197

3.590  
3.555

2.801  
2.786  
2.772  
2.501  
2.486  
2.472

—0.000

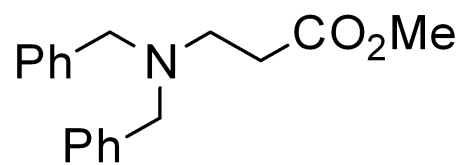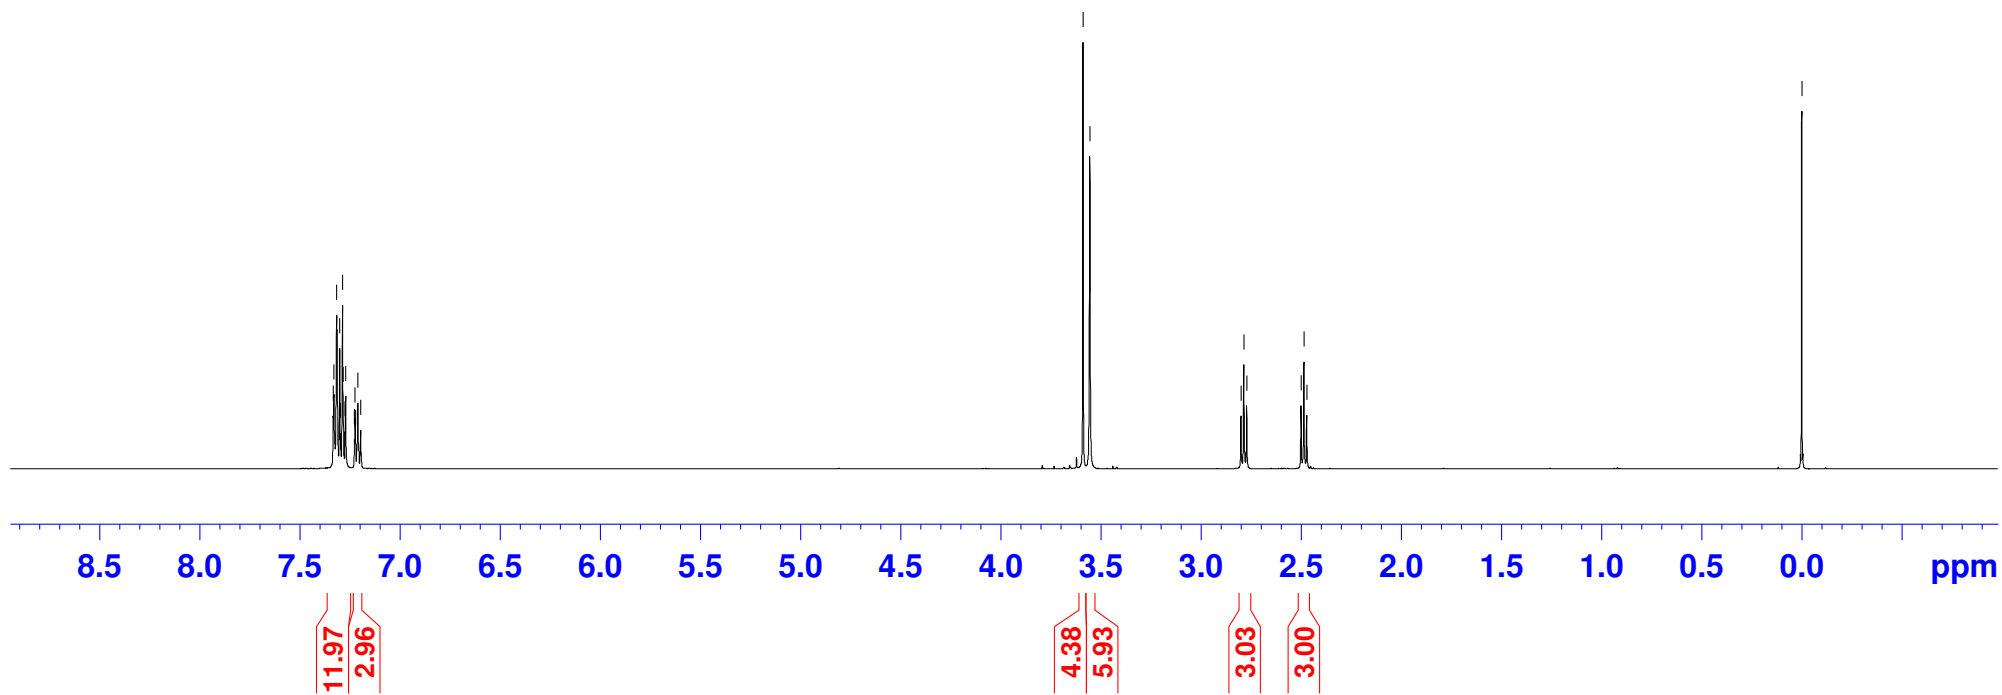

sample 3  
C13  
cdcl3

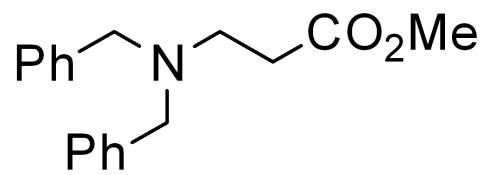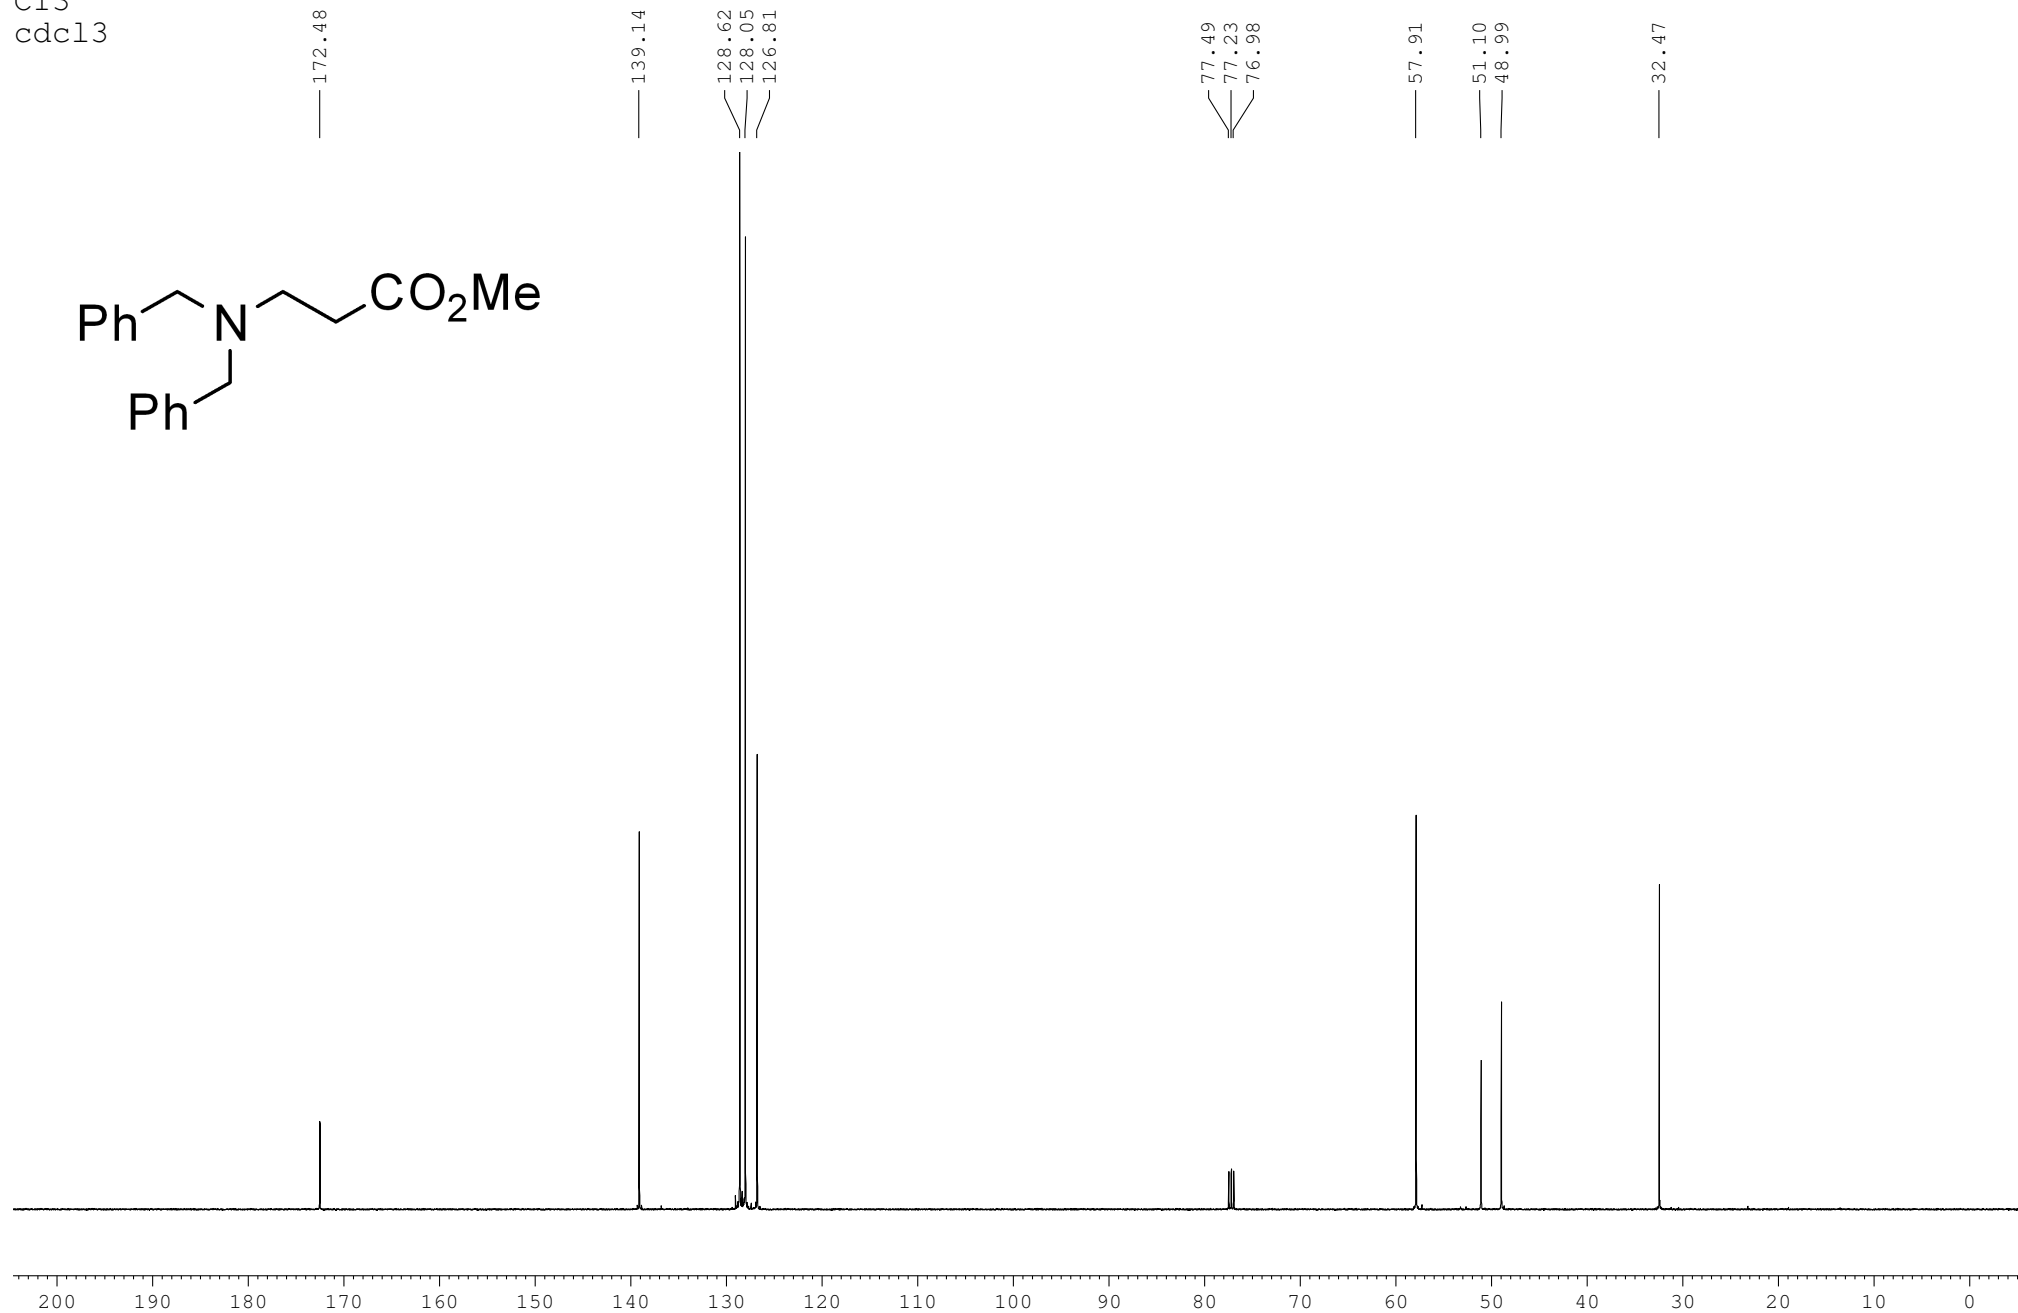

sample 4  
proton  
cdcl3

—7.318

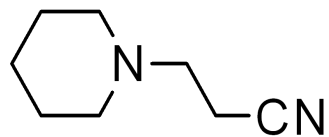

2.684  
2.683  
2.669  
2.655  
2.522  
2.508  
2.494  
2.493  
2.431  
1.611  
1.599  
1.588  
1.576  
1.565  
1.447  
1.436  
1.424

—0.000

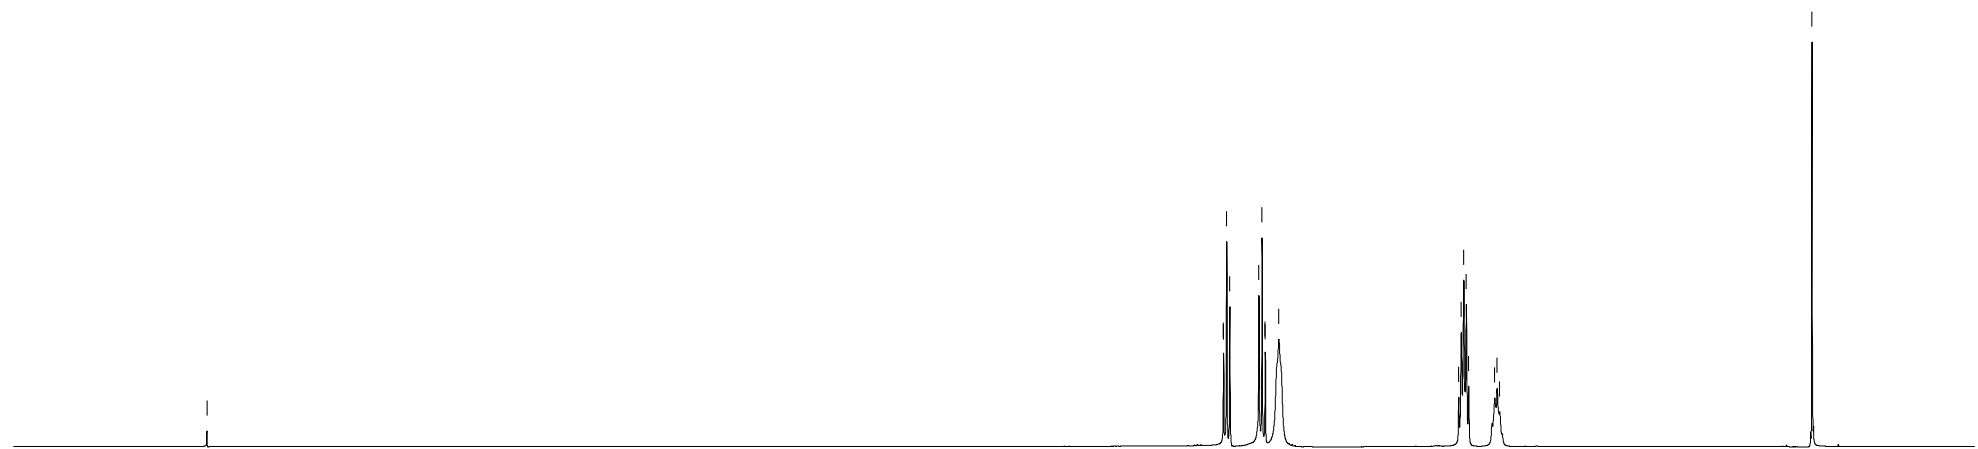

8.0 7.5 7.0 6.5 6.0 5.5 5.0 4.5 4.0 3.5 3.0 2.5 2.0 1.5 1.0 0.5 0.0 ppm

2.14  
2.50  
3.83  
4.13  
2.00

sample 4  
C13  
cdcl3

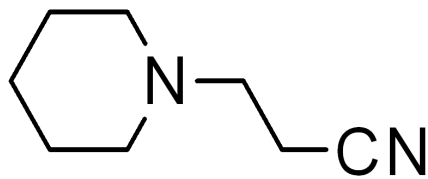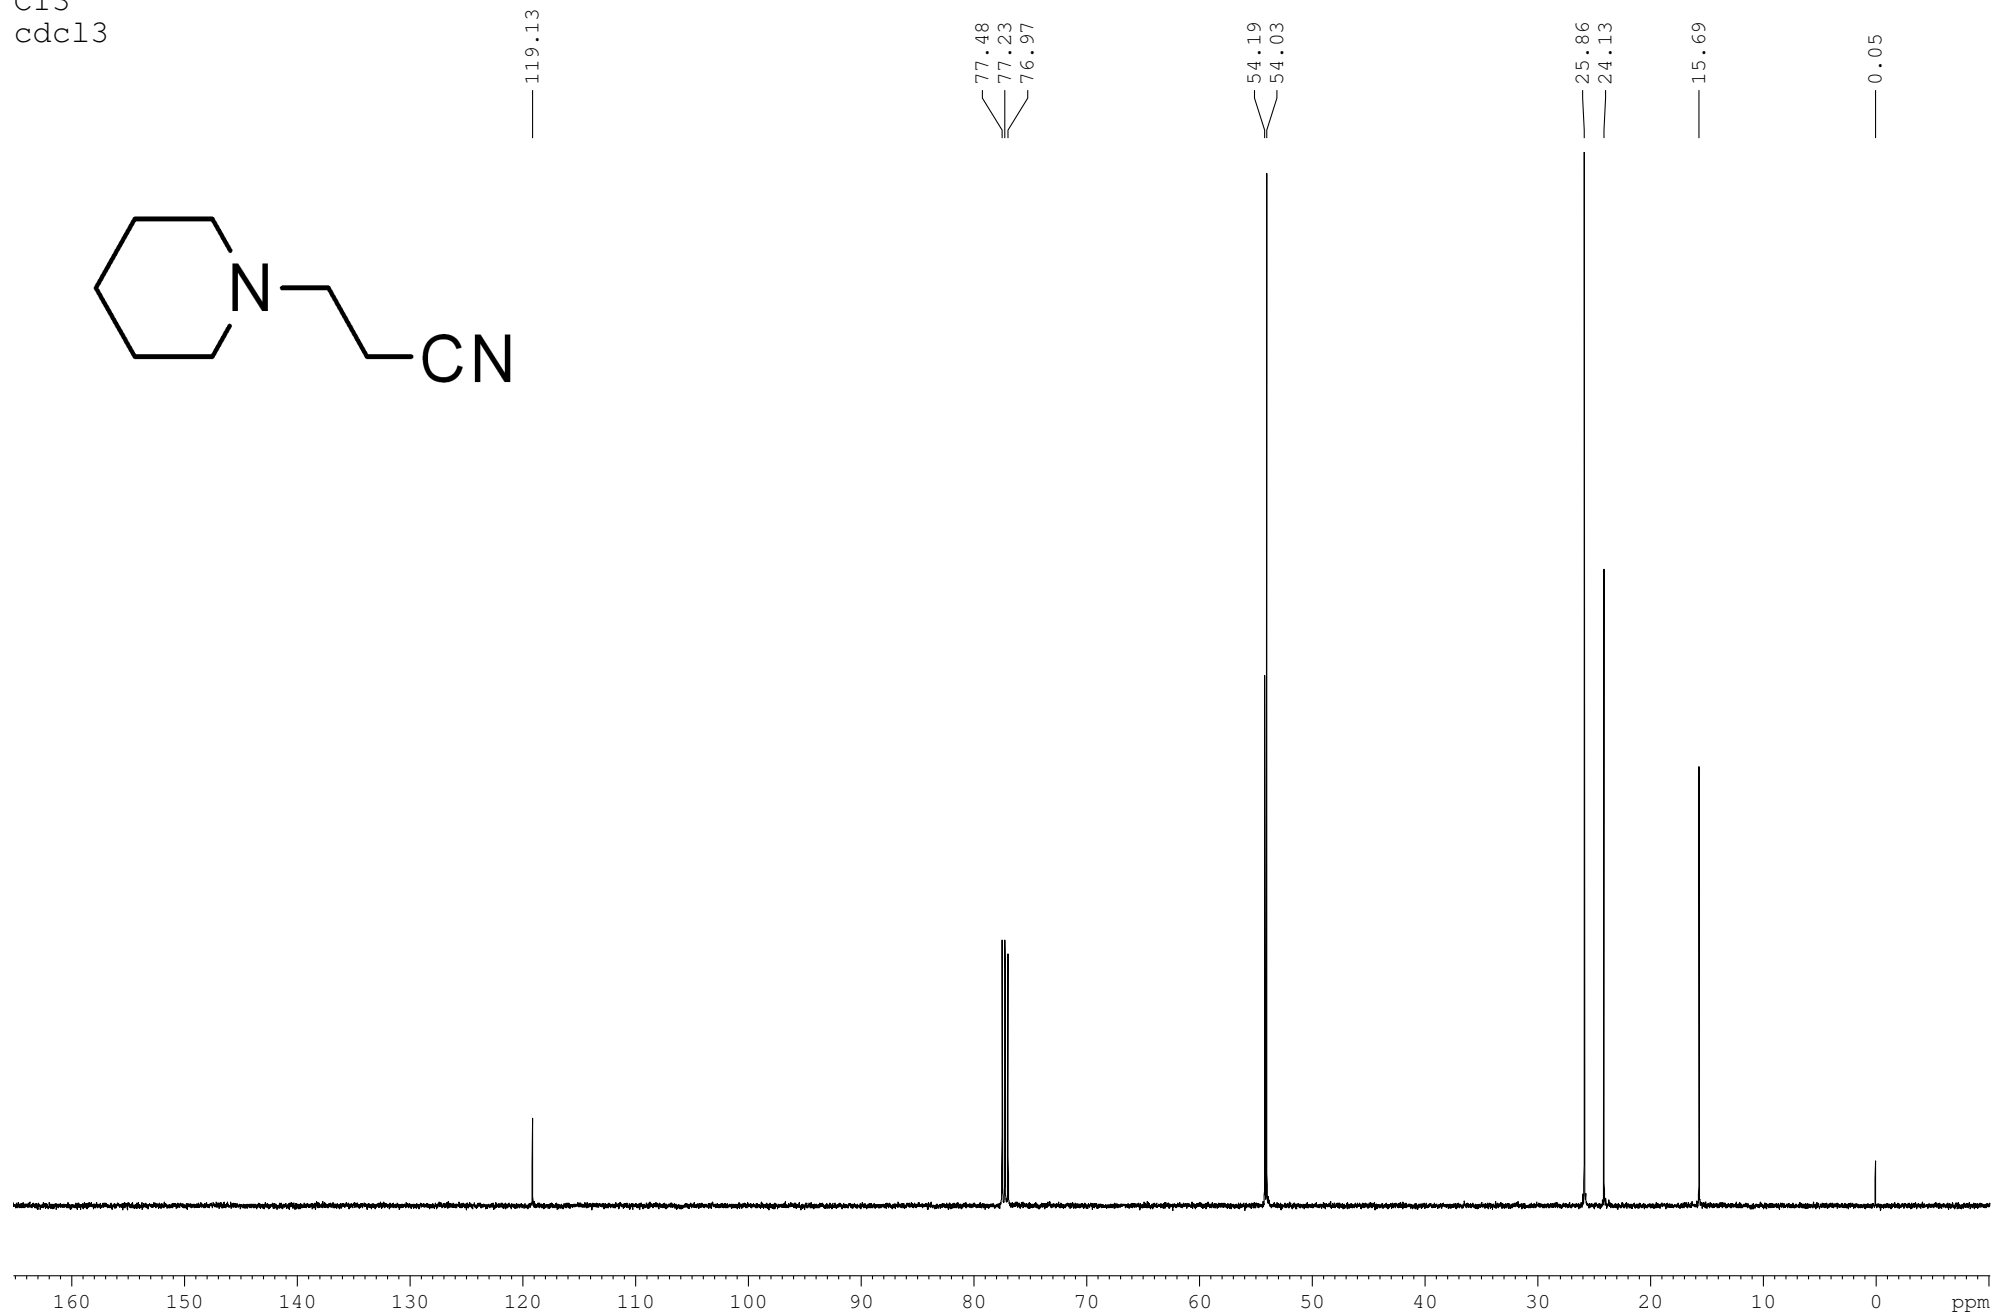

sample 5  
proton  
cdcl3

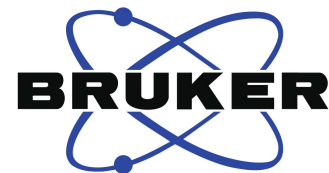

Current Data Parameters  
NAME Tapan\_2015  
EXPNO 55  
PROCNO 1

F2 - Acquisition Parameters  
Date\_ 20150706  
Time 14.39  
INSTRUM spect  
PROBHD 5 mm PABBO BB-  
PULPROG zg30  
TD 65536  
SOLVENT CDCl3  
NS 16  
DS 2  
SWH 10330.578 Hz  
FIDRES 0.157632 Hz  
AQ 3.1719923 sec  
RG 22.6  
DW 48.400 usec  
DE 6.50 usec  
TE 300.0 K  
D1 1.00000000 sec

==== CHANNEL f1 =====  
NUC1 1H  
P1 16.00 usec  
PLW1 13.00000000 W  
SFO1 500.1330885 MHz

F2 - Processing parameters  
SI 65536  
SF 500.1299897 MHz  
WDW EM  
SSB 0  
LB 0.30 Hz  
GB 0  
PC 1.00

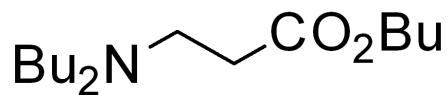

— 7.307

4.083  
4.070  
4.057  
3.668  
2.794  
2.780  
2.765  
2.447  
2.432  
2.418  
2.413  
2.398  
2.395  
2.383  
1.625  
1.611  
1.607  
1.595  
1.582  
1.441  
1.427  
1.425  
1.422  
1.410  
1.396  
1.379  
1.364  
1.328  
1.313

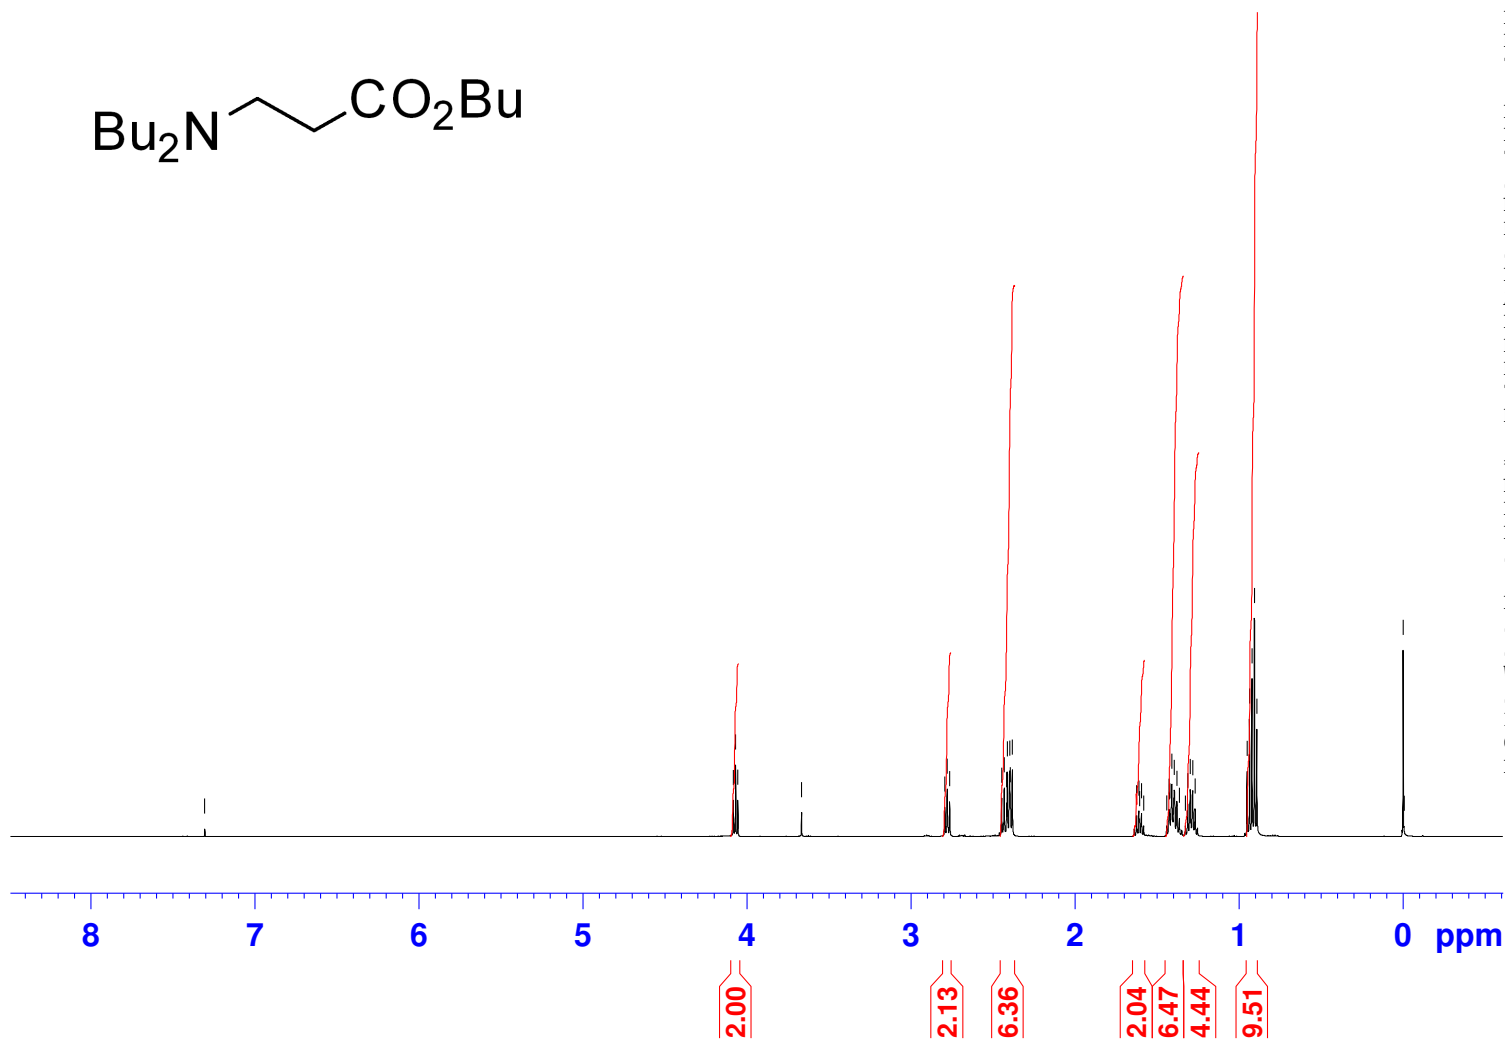

sample 5  
C13  
cdcl3

172.89

77.48  
77.23  
76.97

64.11

53.65  
49.49

32.48  
30.71  
29.34

20.60  
20.47  
19.15  
13.99  
13.65

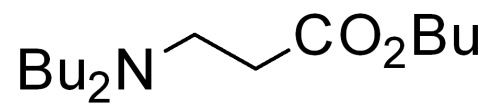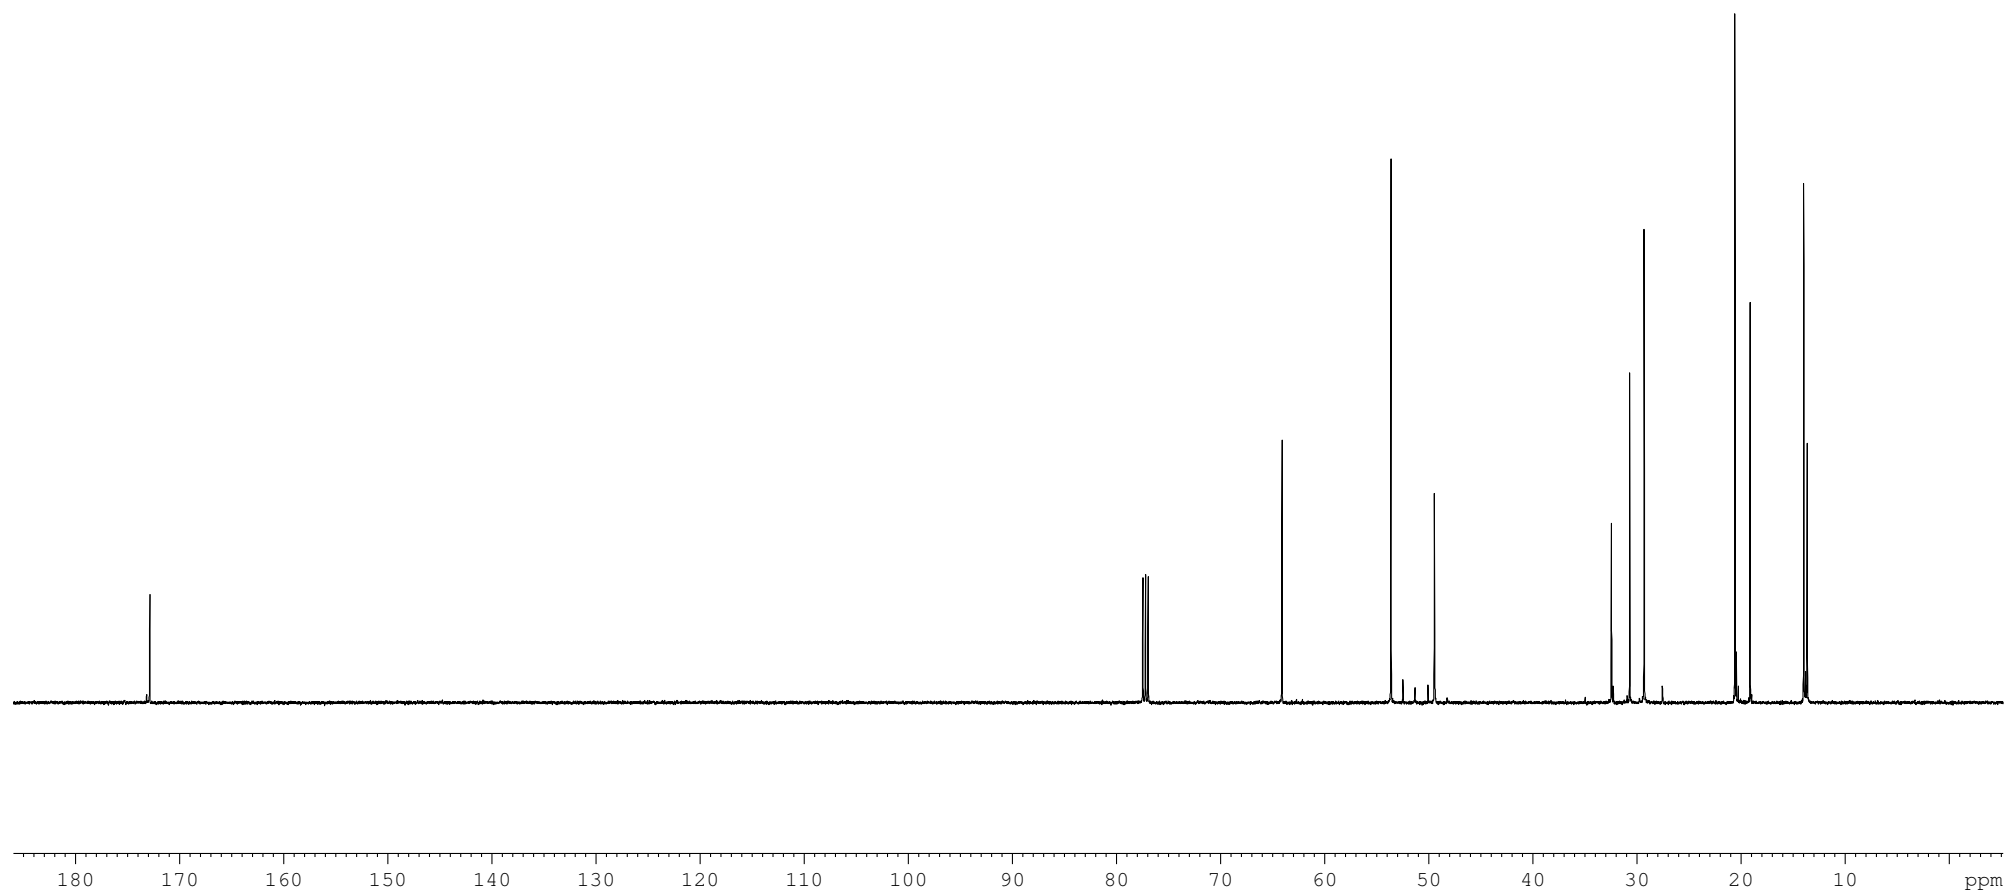

sample 7  
proton  
cdcl3

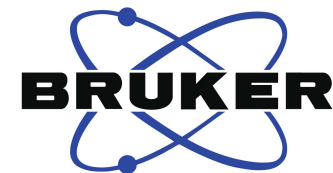

7.388  
7.373  
7.335  
7.331  
7.320  
7.305  
7.262  
7.260  
7.257  
7.249  
7.245  
7.241  
7.230  
7.213

3.616  
2.776  
2.762  
2.748  
2.387  
2.373  
2.359

— — — 0.000

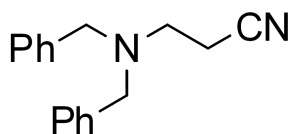

Current Data Parameters  
NAME Tapan\_2015  
EXPNO 57  
PROCNO 1

F2 - Acquisition Parameters  
Date\_ 20150703  
Time 15.42  
INSTRUM spect  
PROBHD 5 mm PABBO BB-  
PULPROG zg30  
TD 65536  
SOLVENT CDCl3  
NS 32  
DS 2  
SWH 10330.578 Hz  
FIDRES 0.157632 Hz  
AQ 3.1719923 sec  
RG 40.3  
DW 48.400 usec  
DE 6.50 usec  
TE 293.3 K  
D1 1.00000000 sec

==== CHANNEL f1 =====  
NUC1 1H  
P1 16.00 usec  
PLW1 13.00000000 W  
SFO1 500.1330885 MHz

F2 - Processing parameters  
SI 65536  
SF 500.1300372 MHz  
WDW EM  
SSB 0  
LB 0.30 Hz  
GB 0  
PC 1.00

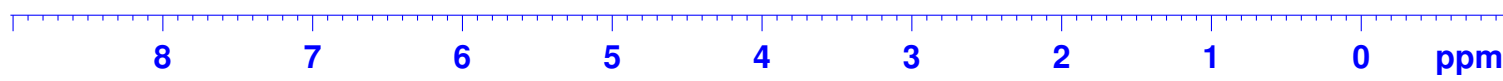

4.00  
4.12  
2.15

4.23

2.10  
2.10

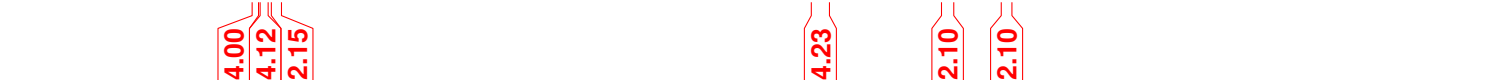

sample 7  
C13  
cdcl3

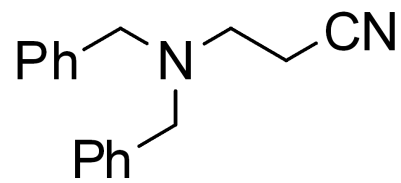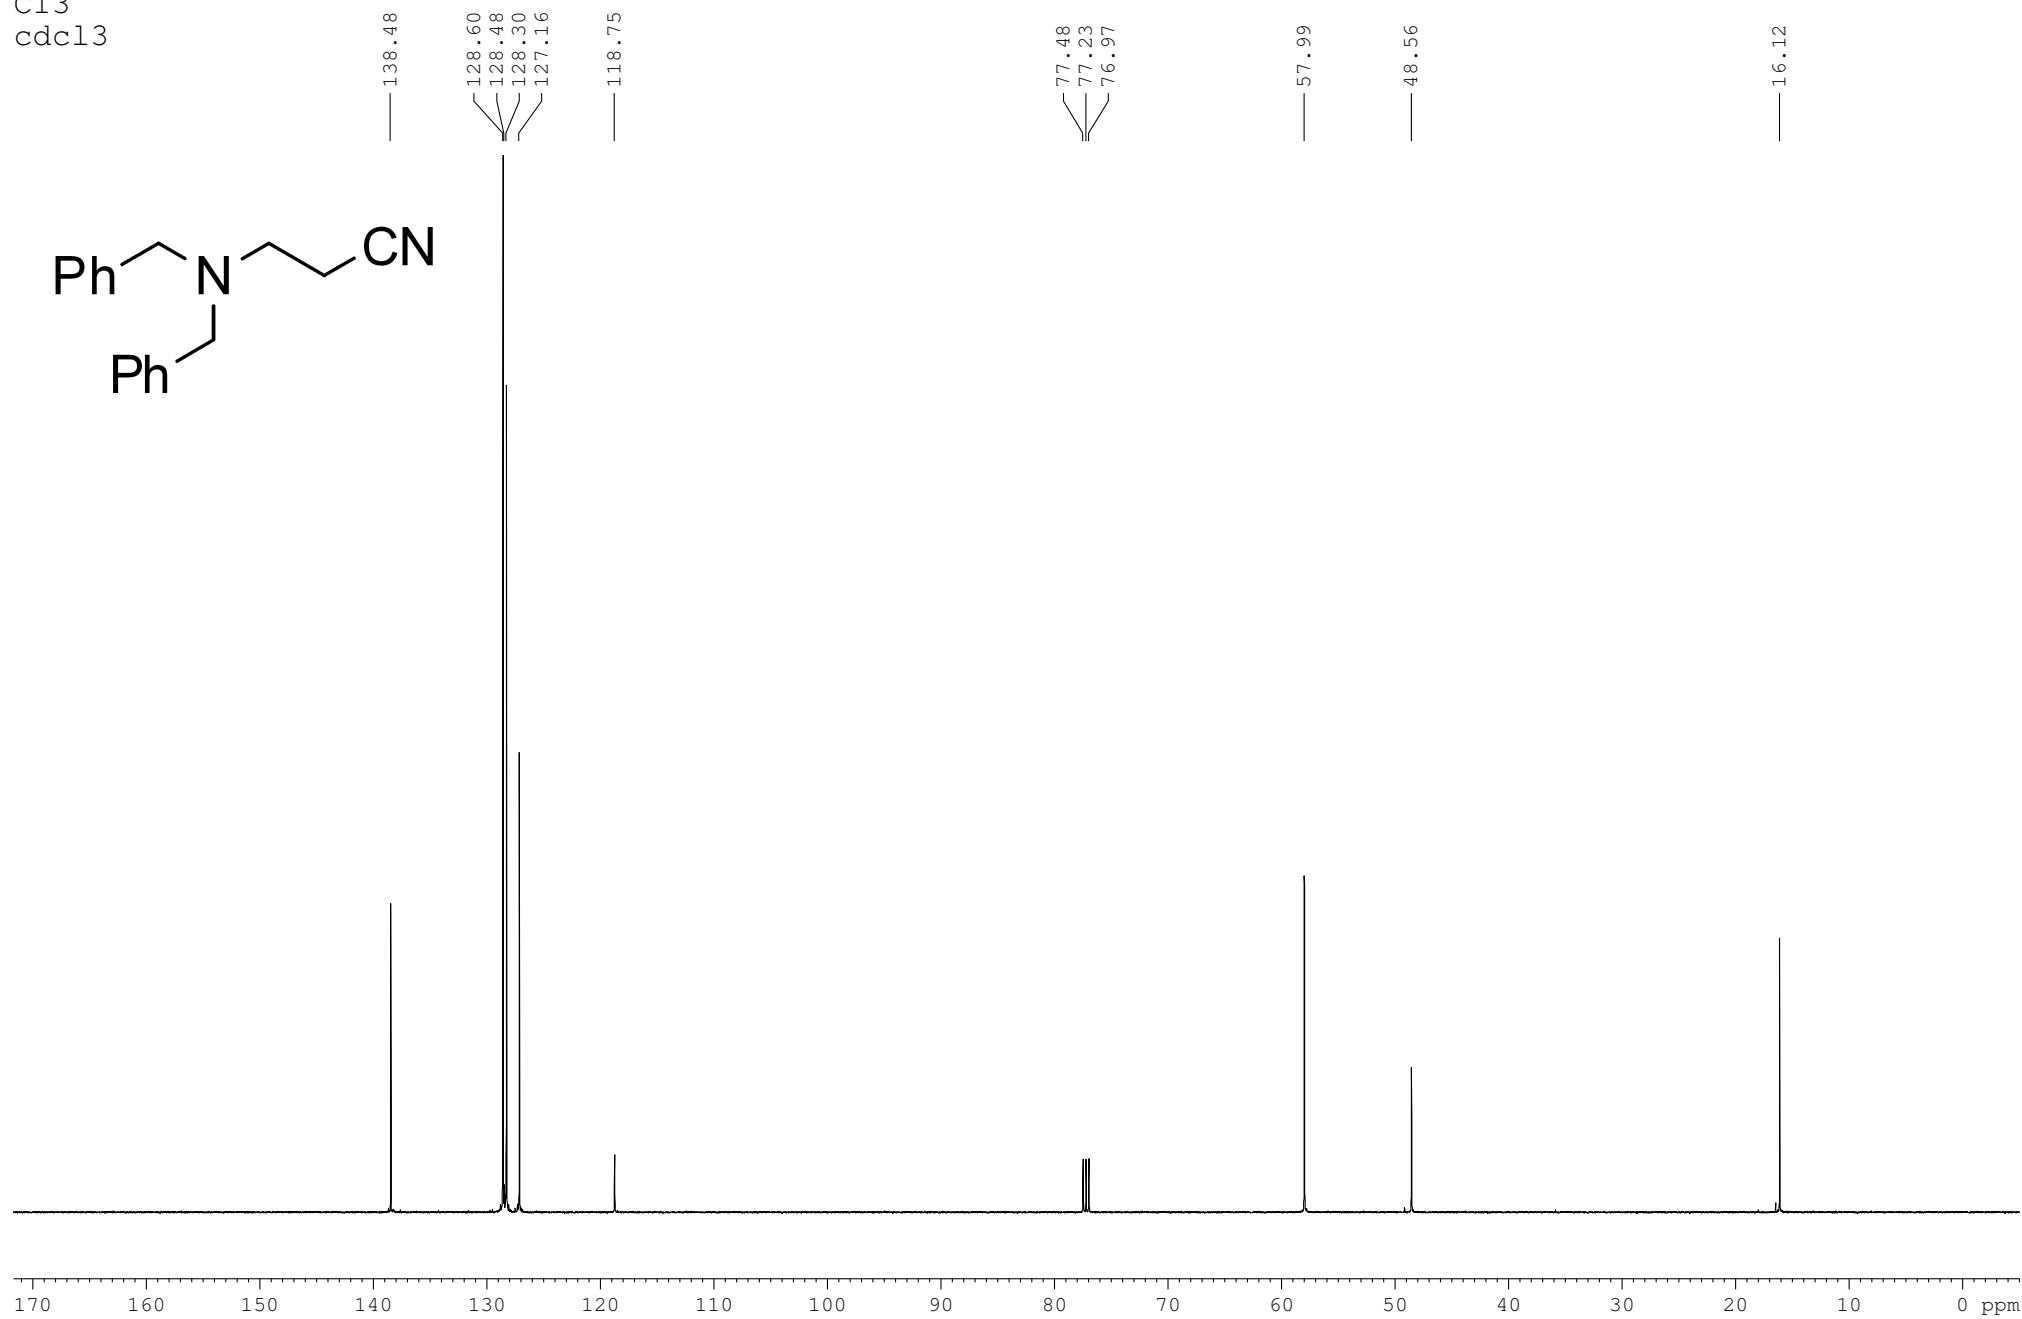



sample 9  
proton  
cdcl3

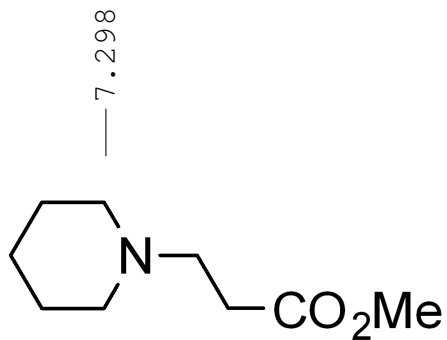

3.678  
2.681  
2.667  
2.664  
2.651  
2.537  
2.521  
2.516  
2.506  
2.396  
1.599  
1.587  
1.576  
1.564  
1.553  
1.437  
1.426  
1.416  
-0.000

Current Data Parameters  
NAME Tapan\_2015  
EXPNO 59  
PROCNO 1

F2 - Acquisition Parameters  
Date\_ 20150703  
Time 15.54  
INSTRUM spect  
PROBHD 5 mm PABBO BB-  
PULPROG zg30  
TD 65536  
SOLVENT CDCl3  
NS 32  
DS 2  
SWH 10330.578 Hz  
FIDRES 0.157632 Hz  
AQ 3.1719923 sec  
RG 50.8  
DW 48.400 usec  
DE 6.50 usec  
TE 293.4 K  
D1 1.00000000 sec

==== CHANNEL f1 =====  
NUC1 1H  
P1 16.00 usec  
PLW1 13.00000000 W  
SFO1 500.1330885 MHz

F2 - Processing parameters  
SI 65536  
SF 500.1299945 MHz  
WDW EM  
SSB 0  
LB 0.30 Hz  
GB 0  
PC 1.00

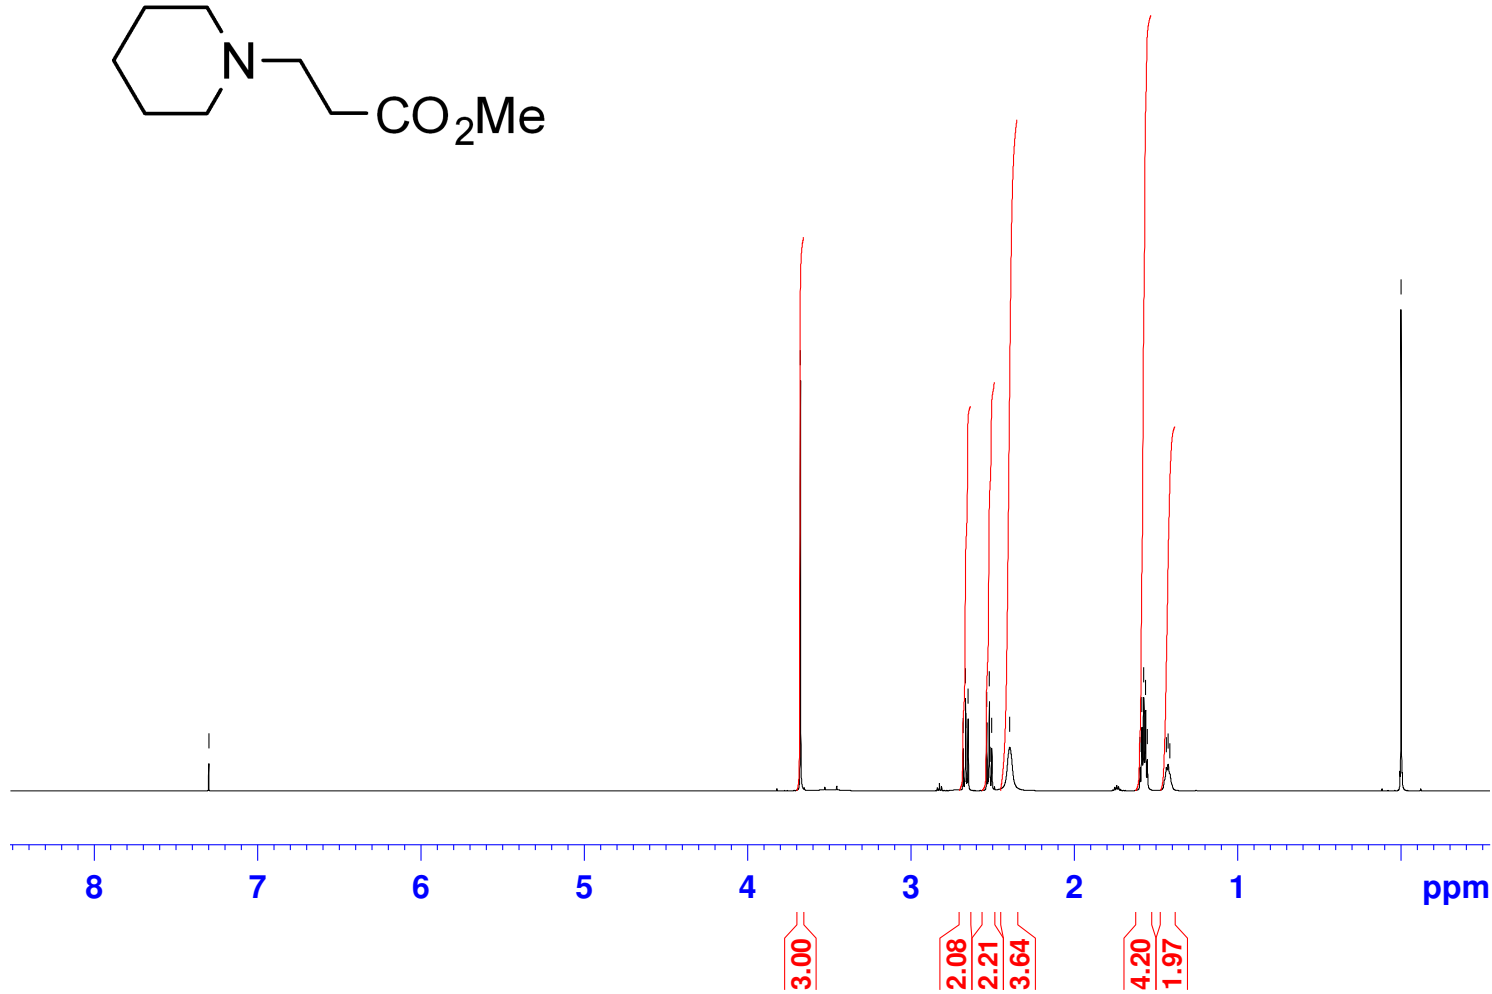

sample 9  
C13  
cdcl3

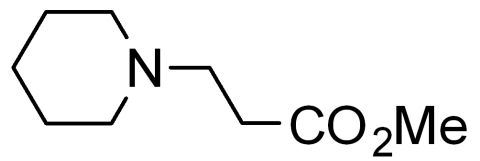

173.28

77.49  
77.23  
76.98

54.35  
54.33  
53.30  
51.71

32.08  
25.97  
24.35

200 190 180 170 160 150 140 130 120 110 100 90 80 70 60 50 40 30 20 10 0 ppm

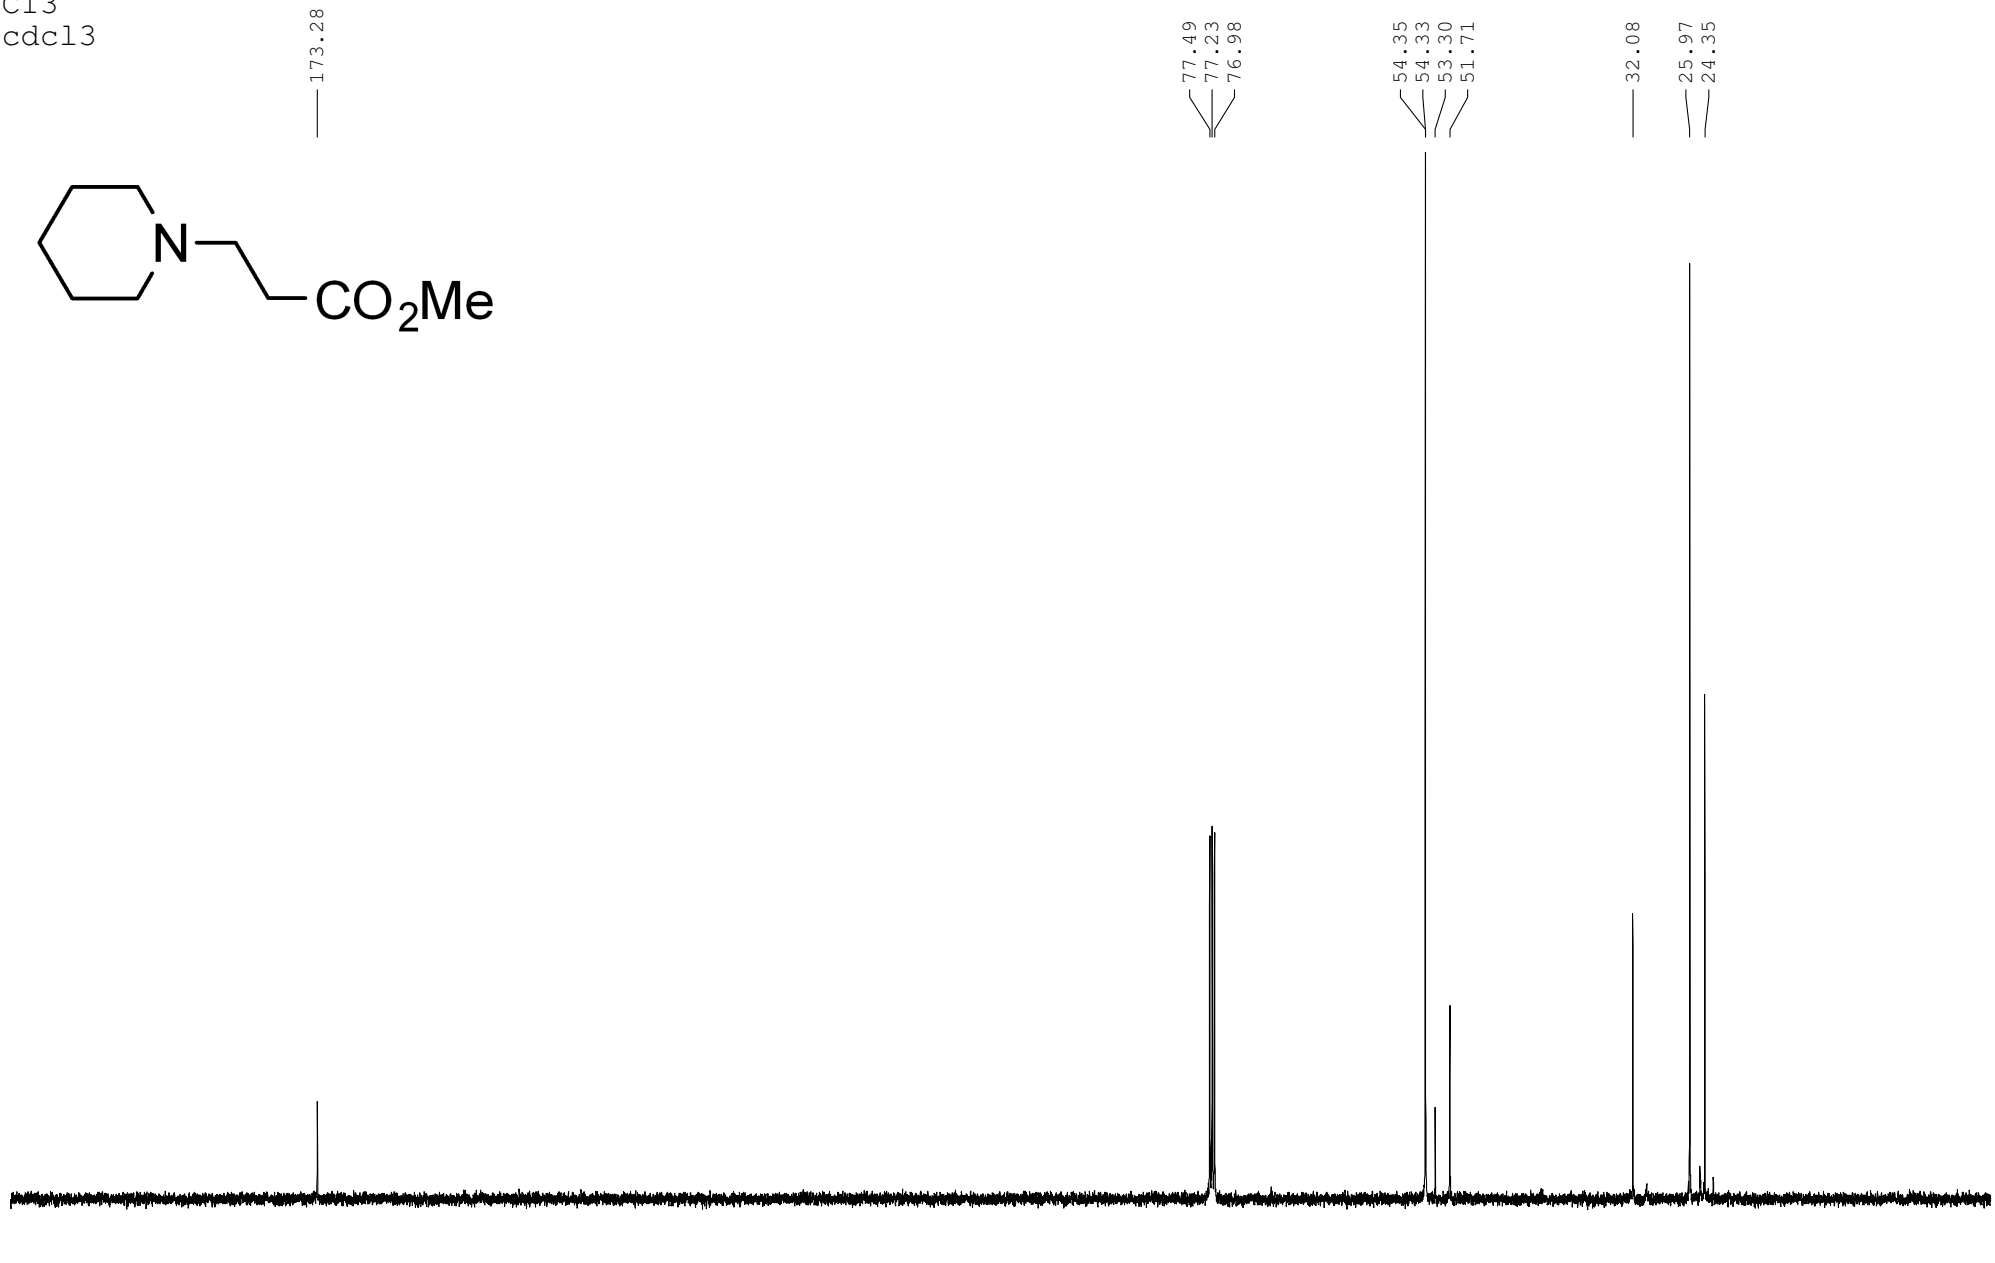

sample 10  
proton  
cdcl3



Current Data Parameters  
NAME Tapan\_2015  
EXPNO 60  
PROCNO 1

F2 - Acquisition Parameters  
Date\_ 20150706  
Time 14.55  
INSTRUM spect  
PROBHD 5 mm PABBO BB-  
PULPROG zg30  
TD 65536  
SOLVENT CDCl3  
NS 16  
DS 2  
SWH 10330.578 Hz  
FIDRES 0.157632 Hz  
AQ 3.1719923 sec  
RG 22.6  
DW 48.400 usec  
DE 6.50 usec  
TE 293.3 K  
D1 1.00000000 sec

===== CHANNEL f1 =====  
NUC1 1H  
P1 16.00 usec  
PLW1 13.00000000 W  
SFO1 500.1330885 MHz

F2 - Processing parameters  
SI 65536  
SF 500.1299762 MHz  
WDW EM  
SSB 0  
LB 0.30 Hz  
GB 0  
PC 1.00

7.335

3.724  
3.715  
3.705  
2.691  
2.677  
2.664  
2.545  
2.531  
2.517  
2.510  
2.501  
2.492

0.000

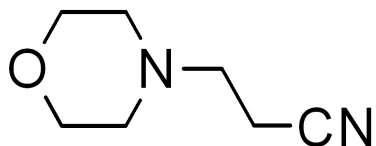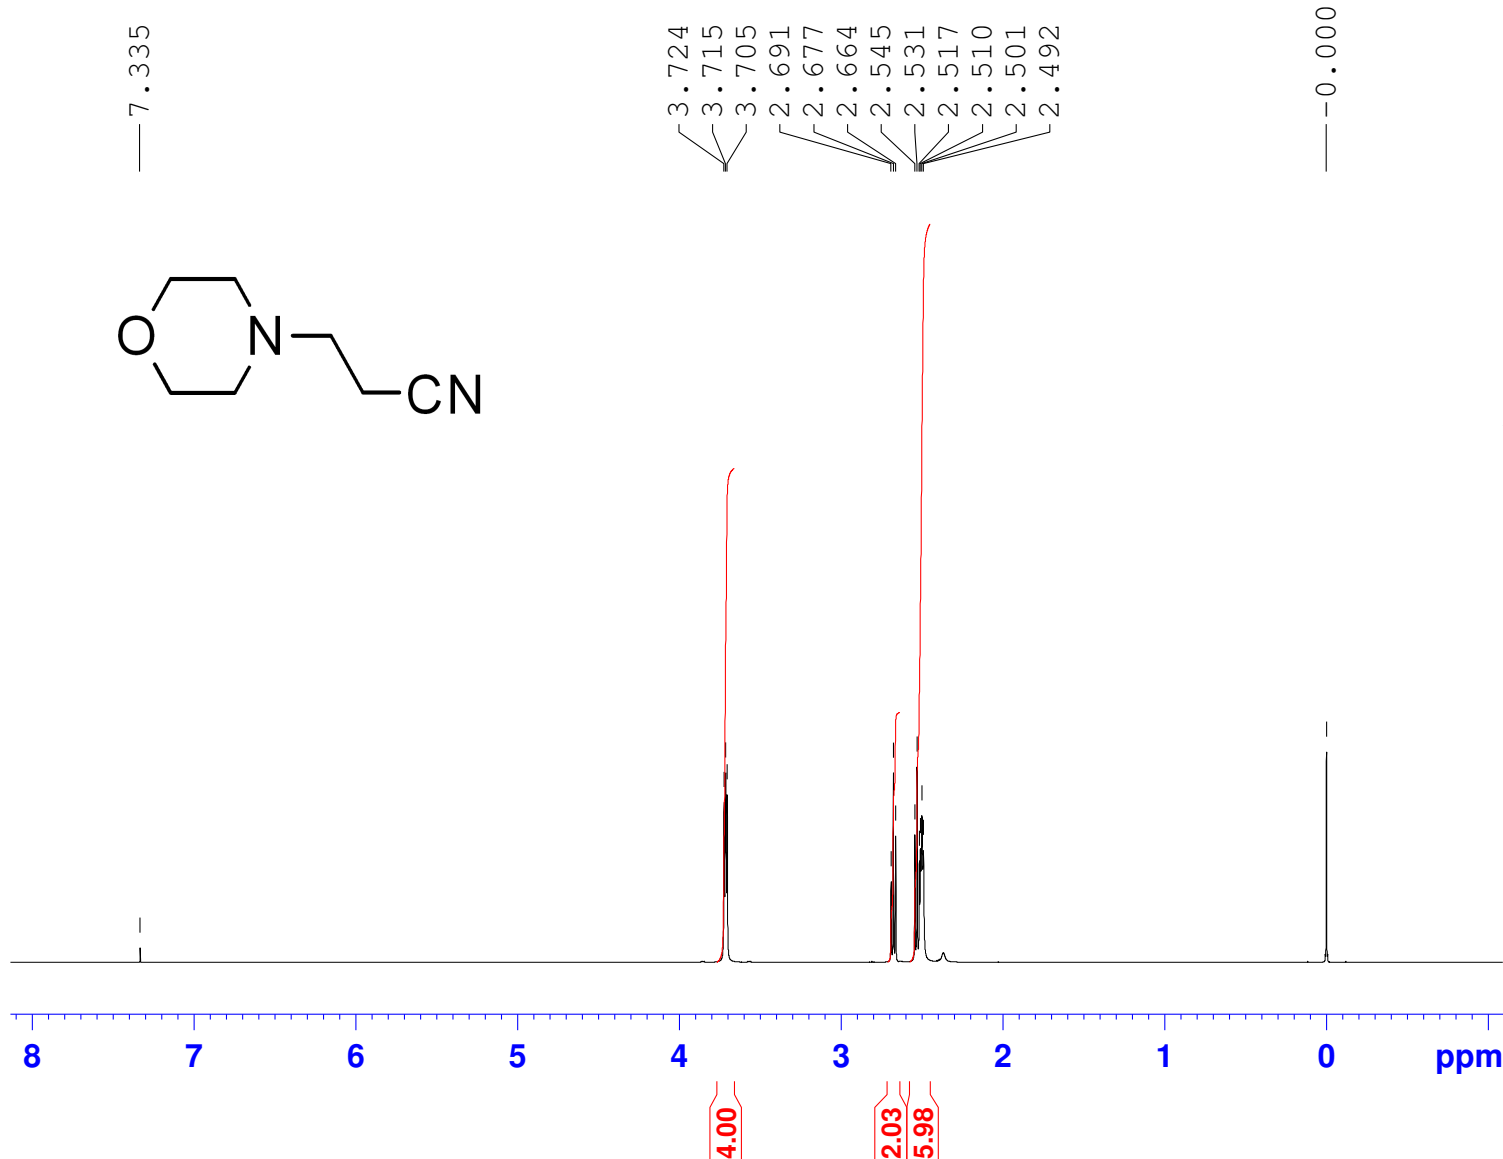

sample 10  
C13  
cdcl3

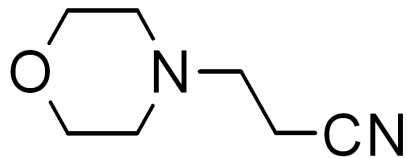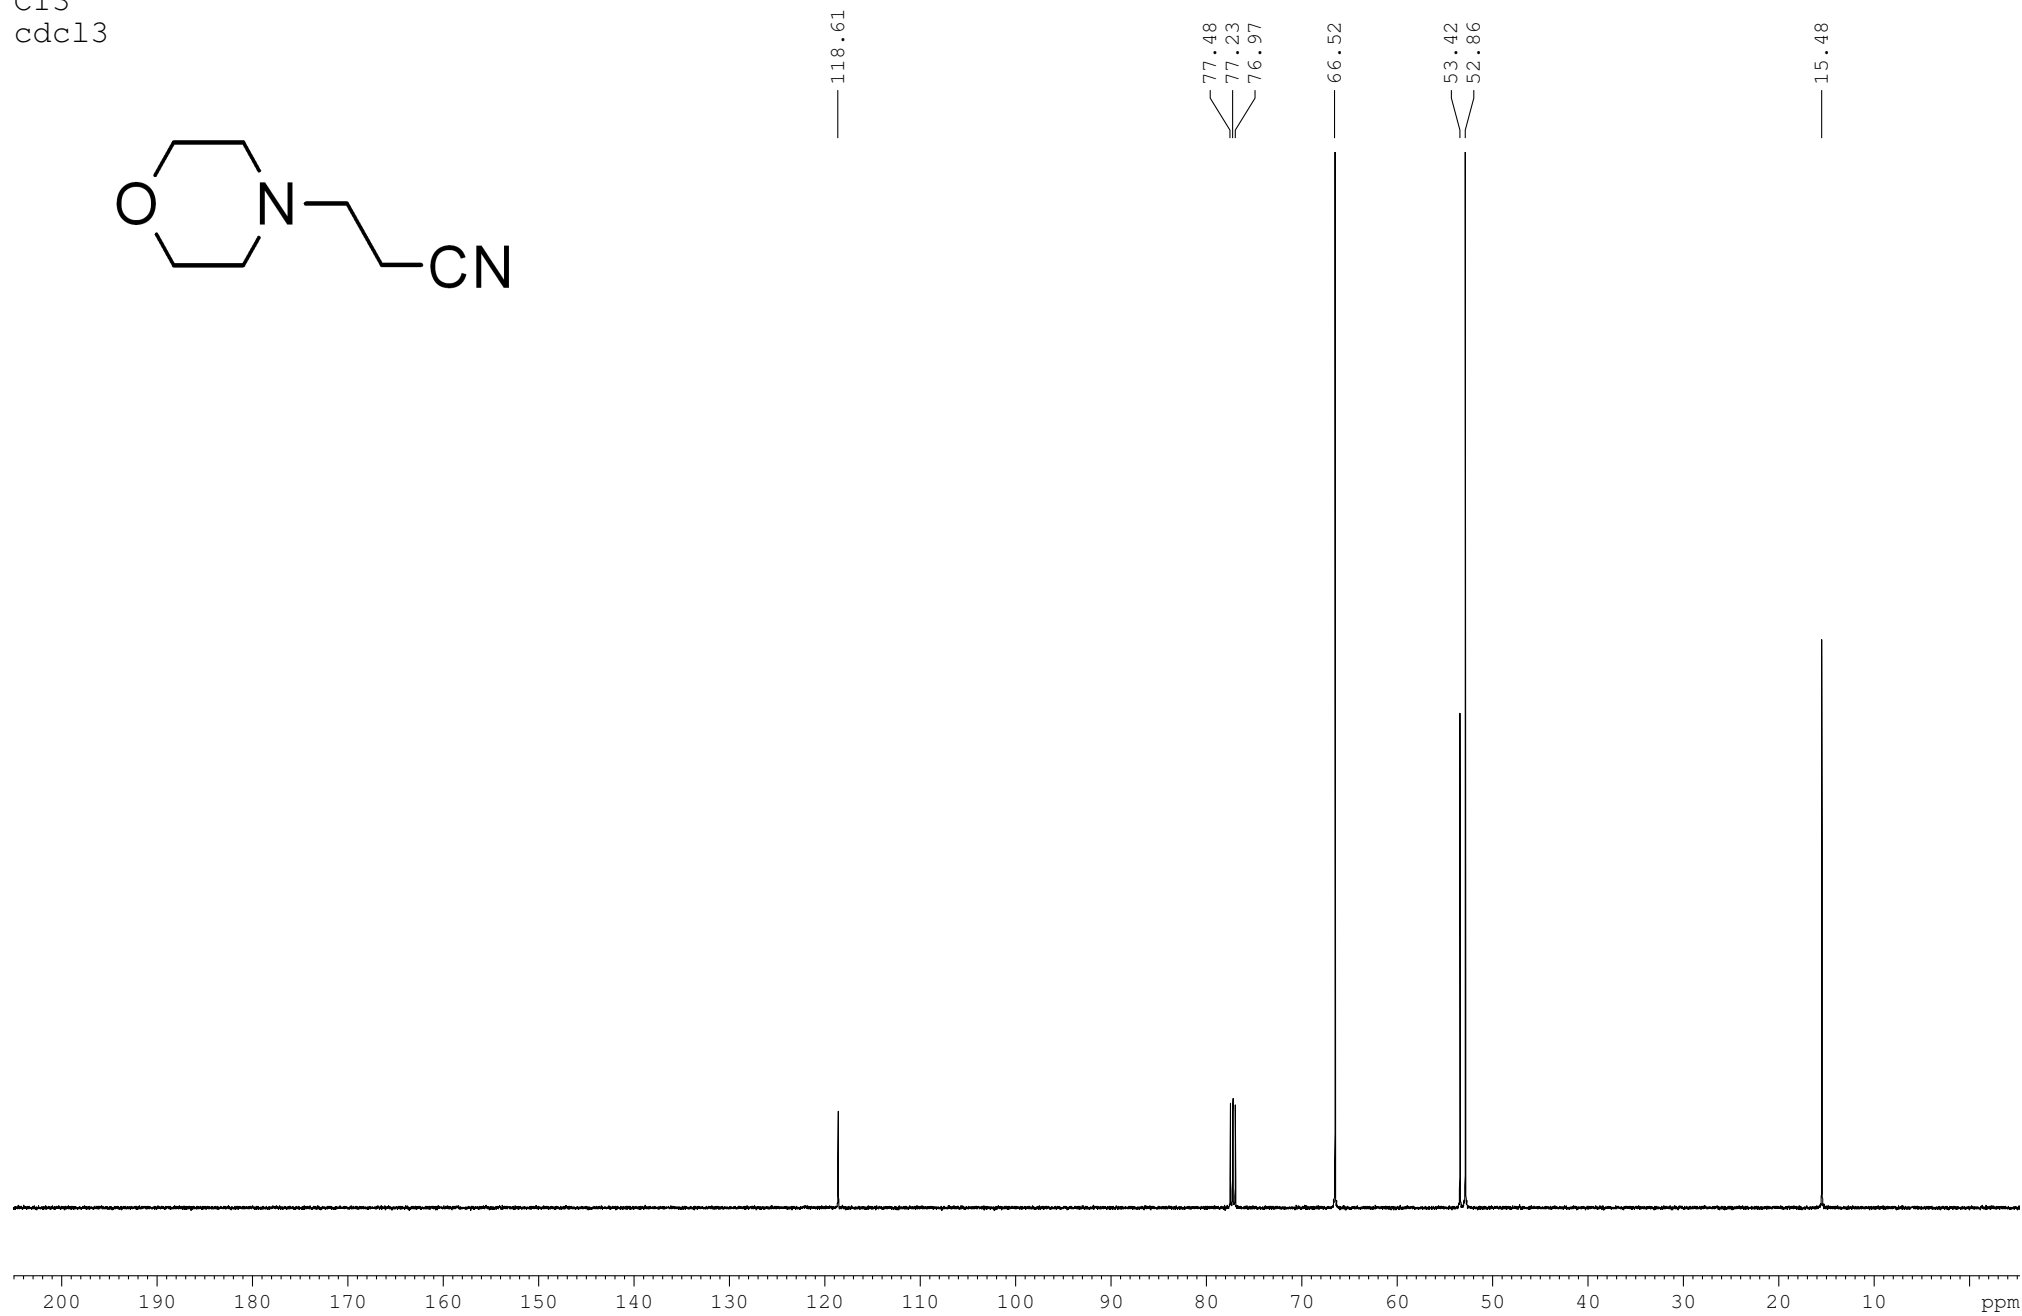

sample 11  
proton  
cdcl3



Current Data Parameters  
NAME Tapan\_2015  
EXPNO 61  
PROCNO 1

F2 - Acquisition Parameters  
Date\_ 20150706  
Time 15.02  
INSTRUM spect  
PROBHD 5 mm PABBO BB-  
PULPROG zg30  
TD 65536  
SOLVENT CDCl3  
NS 32  
DS 2  
SWH 10330.578 Hz  
FIDRES 0.157632 Hz  
AQ 3.1719923 sec  
RG 14.2  
DW 48.400 usec  
DE 6.50 usec  
TE 293.3 K  
D1 1.00000000 sec

==== CHANNEL f1 =====  
NUC1 1H  
P1 16.00 usec  
PLW1 13.00000000 W  
SFO1 500.1330885 MHz

F2 - Processing parameters  
SI 65536  
SF 500.1300624 MHz  
WDW EM  
SSB 0  
LB 0.30 Hz  
GB 0  
PC 1.00

7.331  
7.329  
7.314  
7.288  
7.284  
7.273  
7.258  
7.213  
7.211  
7.208  
7.196

4.023  
4.009  
3.996  
3.549  
2.807  
2.793  
2.779  
2.486  
2.472  
2.458  
1.539  
1.525  
1.521  
1.509  
1.496  
1.339  
1.327  
1.324  
1.313  
1.309  
1.294  
0.907  
0.892  
0.878  
0.000

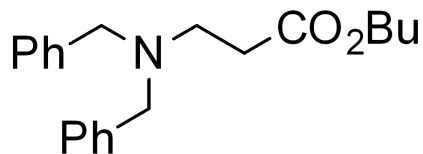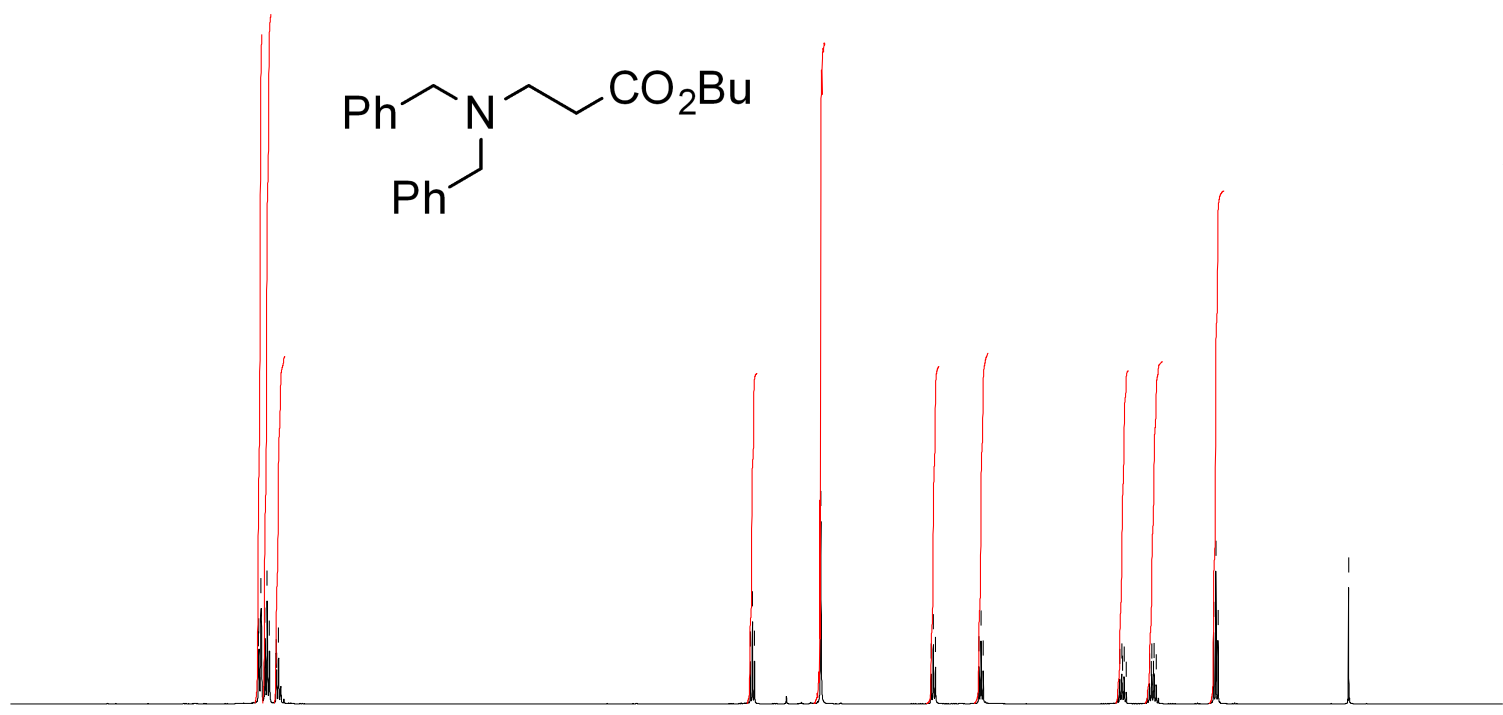

3.88  
4.00  
2.02

1.92  
3.84

1.96  
2.04

1.93  
1.99  
2.98

8 7 6 5 4 3 2 1 0 ppm

sample 11  
C13  
cdcl3

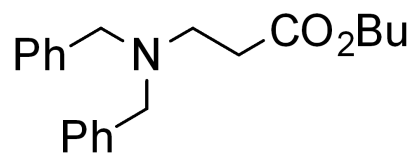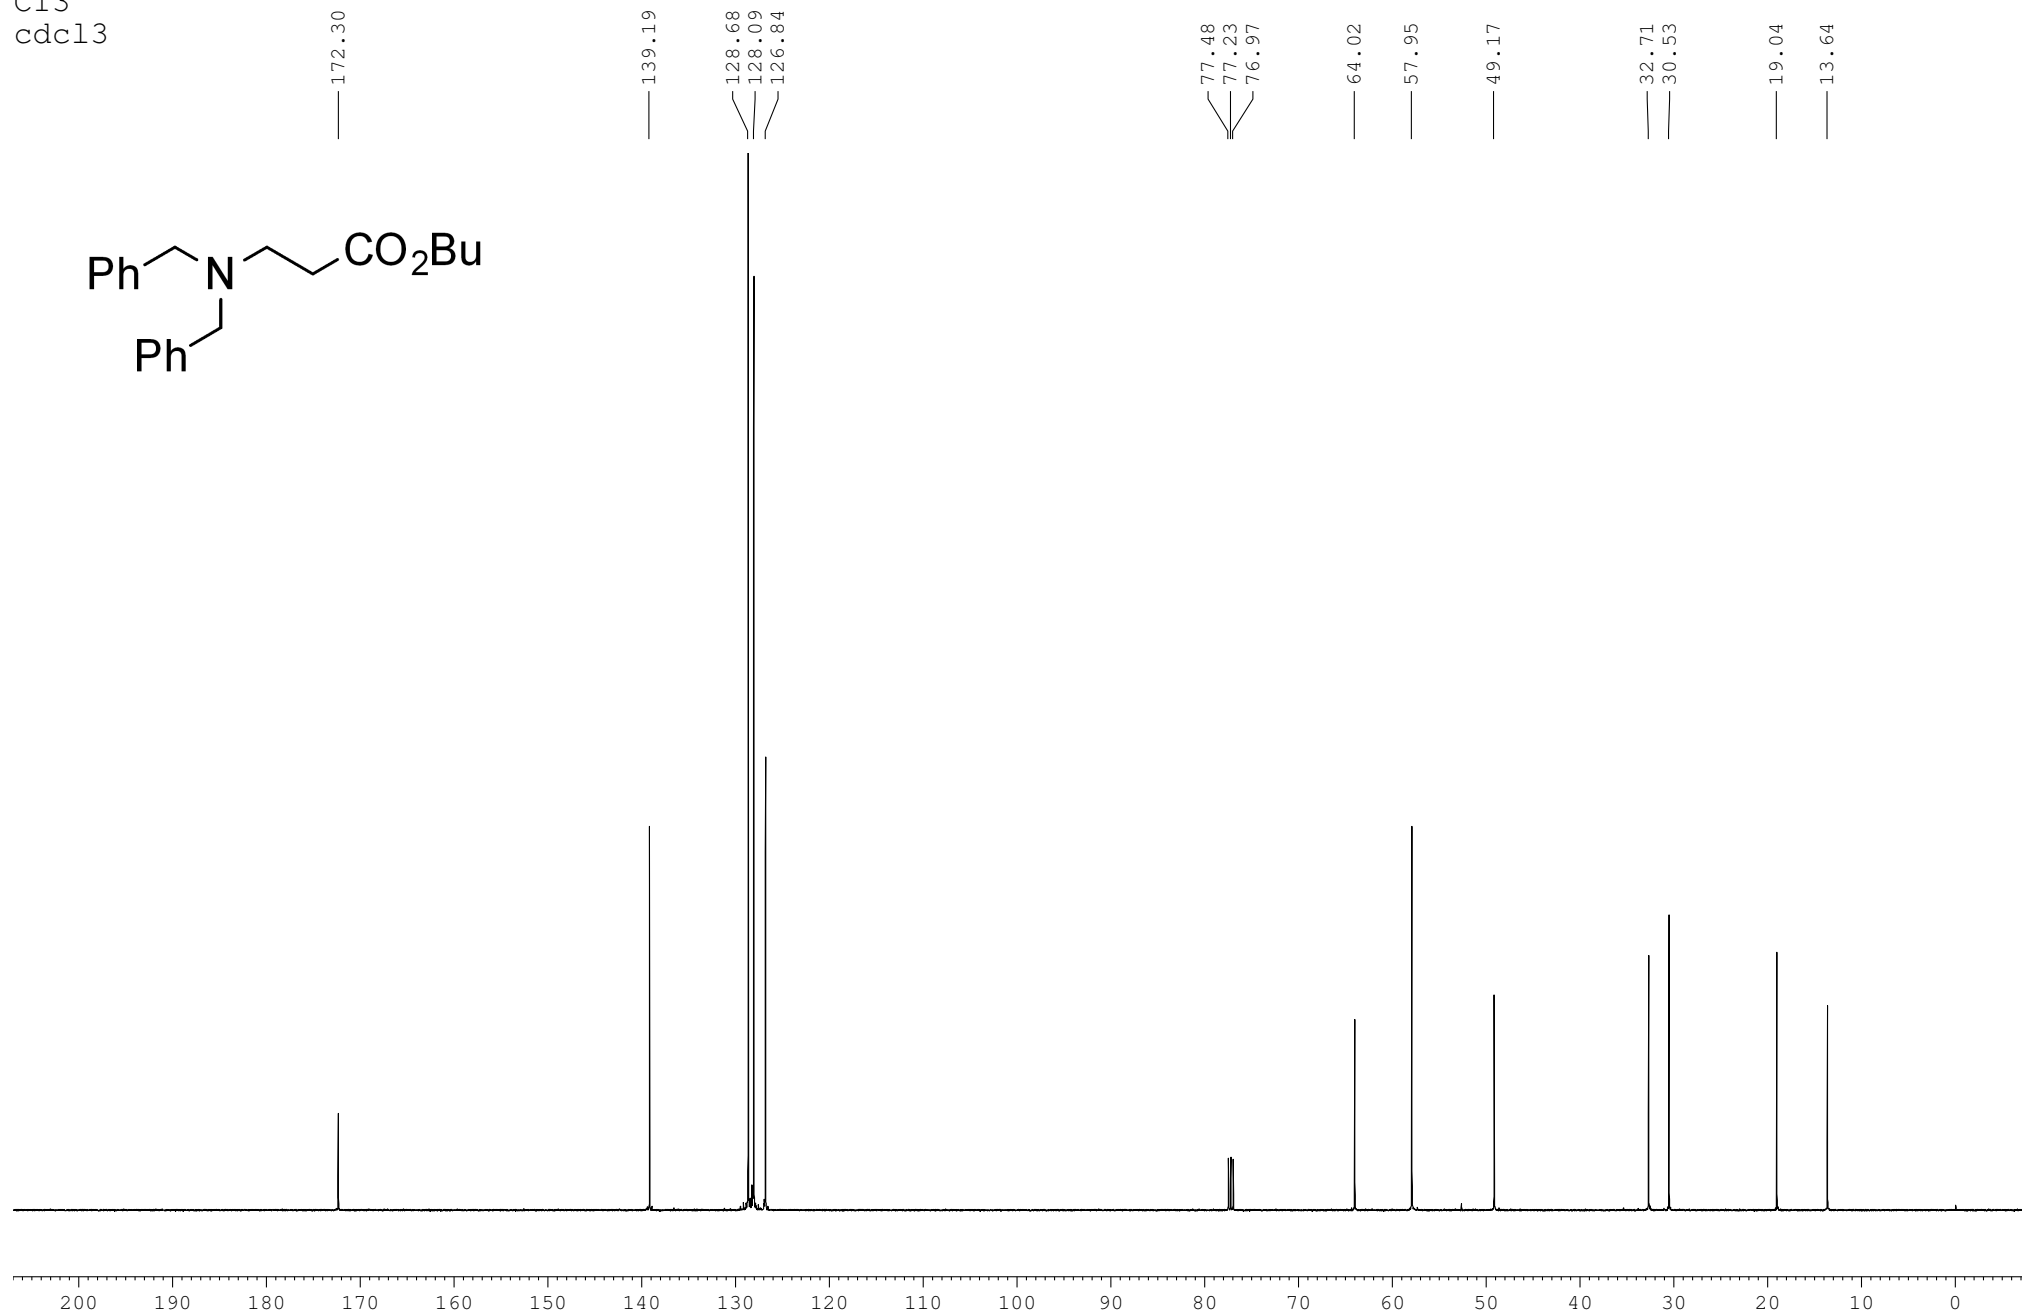

sample 13  
proton  
cdcl3

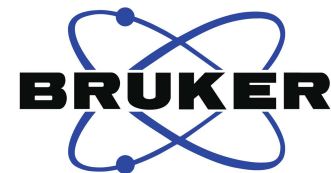

Current Data Parameters  
NAME Tapan\_2015  
EXPNO 63  
PROCNO 1

F2 - Acquisition Parameters  
Date\_ 20150706  
Time 15.16  
INSTRUM spect  
PROBHD 5 mm PABBO BB-  
PULPROG zg30  
TD 65536  
SOLVENT CDCl3  
NS 32  
DS 2  
SWH 10330.578 Hz  
FIDRES 0.157632 Hz  
AQ 3.1719923 sec  
RG 12.7  
DW 48.400 usec  
DE 6.50 usec  
TE 293.2 K  
D1 1.00000000 sec

==== CHANNEL f1 =====  
NUC1 1H  
P1 16.00 usec  
PLW1 13.00000000 W  
SFO1 500.1330885 MHz

F2 - Processing parameters  
SI 65536  
SF 500.1299704 MHz  
WDW EM  
SSB 0  
LB 0.30 Hz  
GB 0  
PC 1.00

7.346

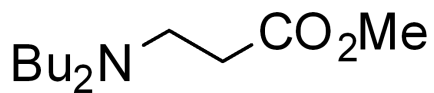

3.665  
2.787  
2.773  
2.758  
2.457  
2.442  
2.428  
2.409  
2.394  
2.379  
1.437  
1.424  
1.419  
1.407  
1.402  
1.393  
1.389  
1.378  
1.328  
1.313  
1.298  
1.283  
1.268  
0.921  
0.906  
0.891  
-0.000

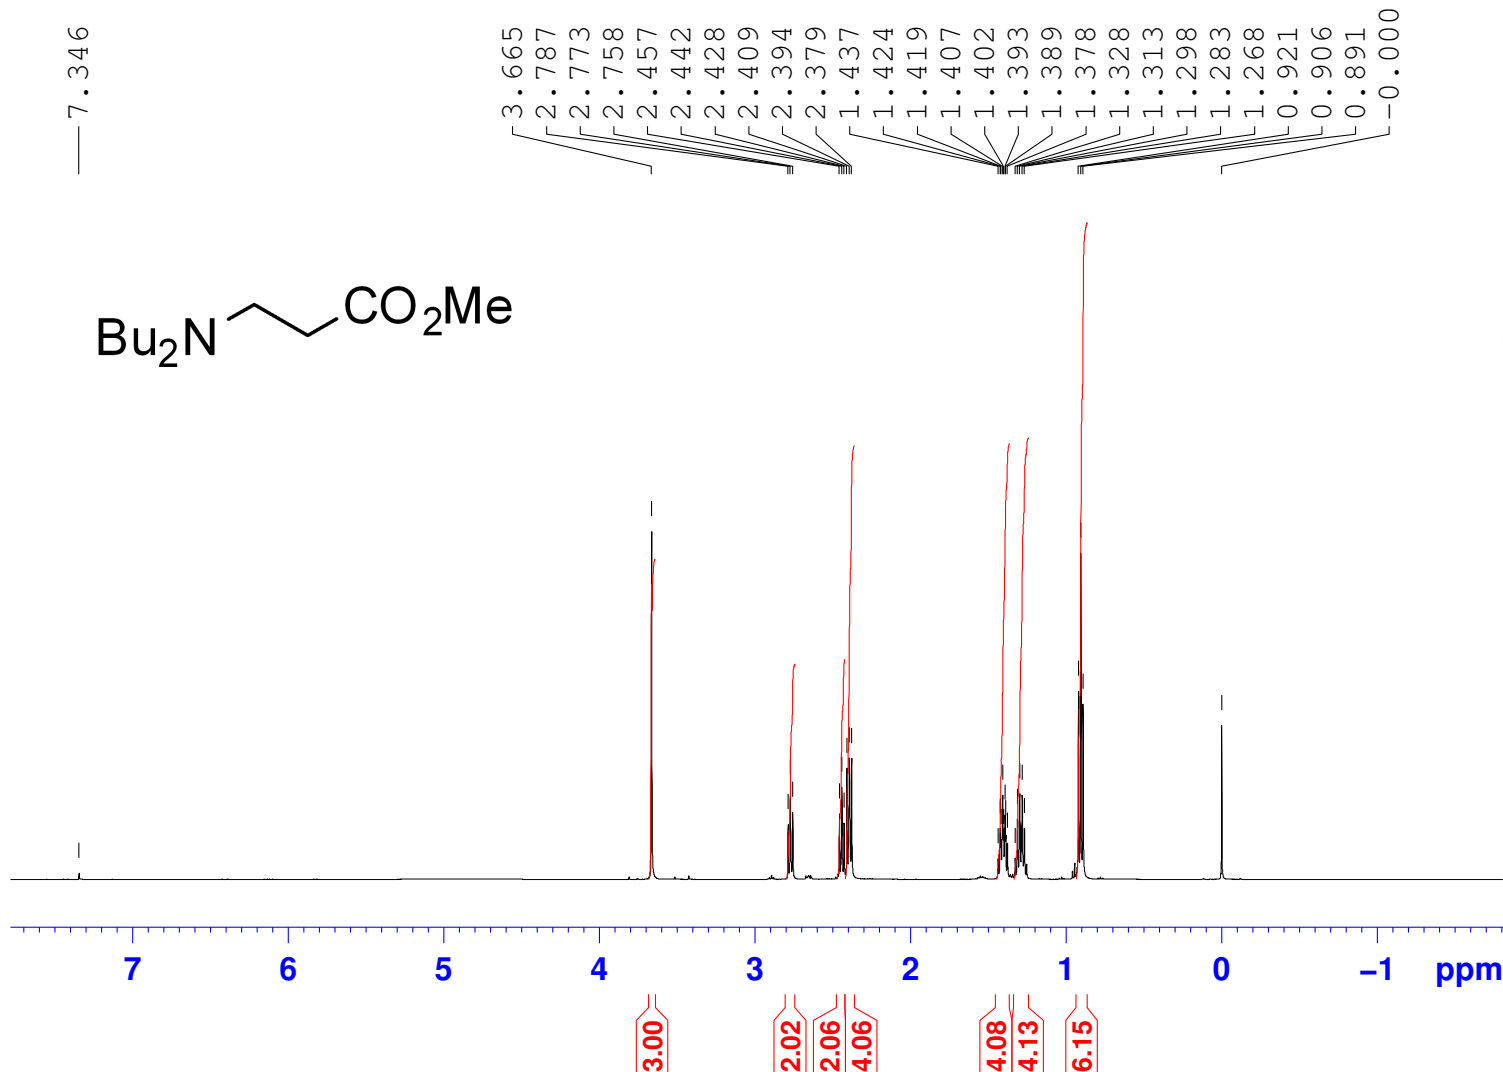

sample 13  
C13  
cdcl3

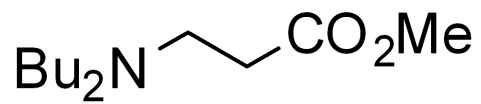

173.16

77.46  
77.21  
76.95

53.60  
51.29  
49.36

32.24  
29.26

20.53  
20.43

13.94  
13.77

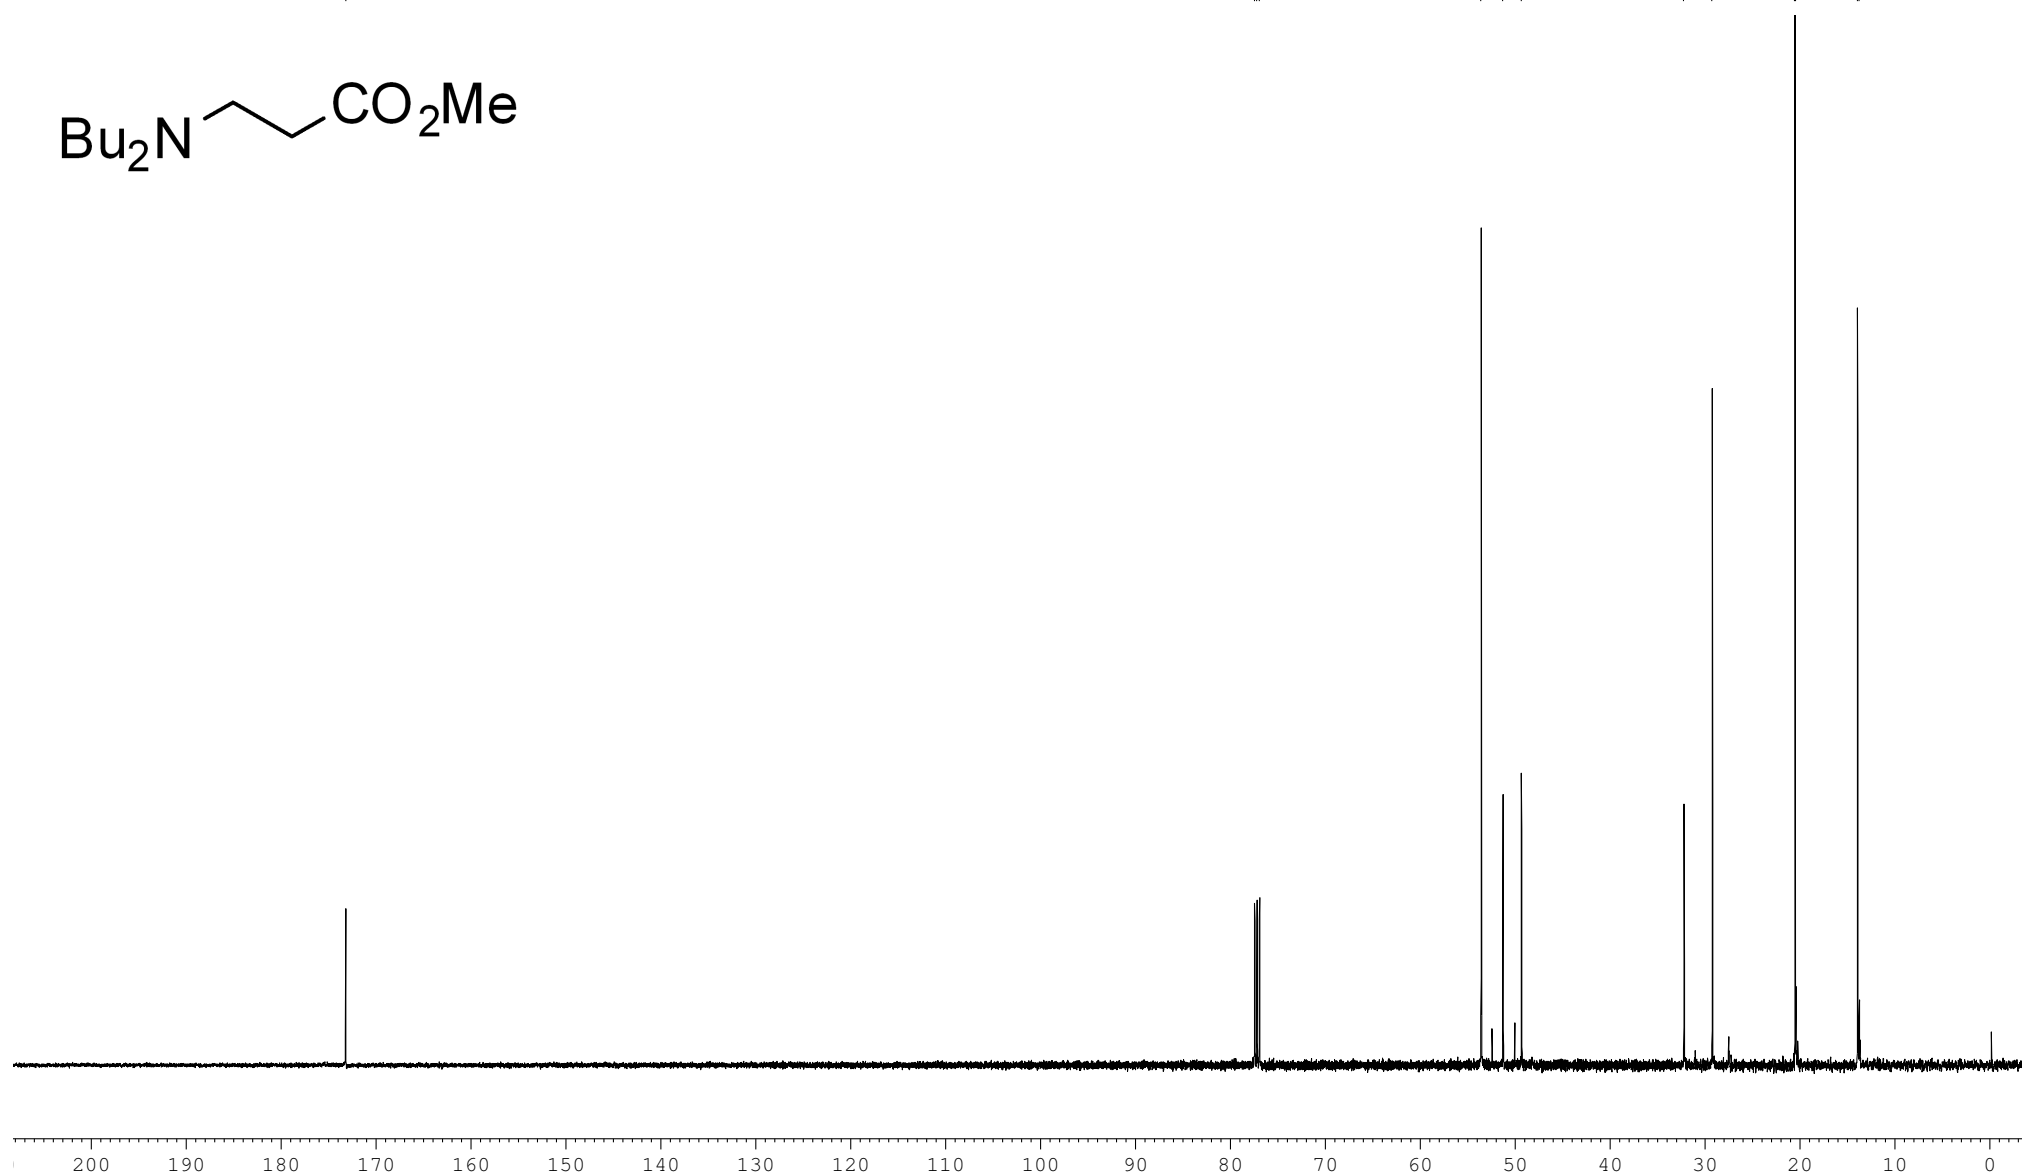



sample 15  
proton  
cdcl3



7.402

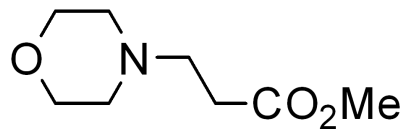

3.685  
2.877  
2.698  
2.684  
2.669  
2.528  
2.513  
2.499  
2.467  
2.458  
2.450

0.000

Current Data Parameters  
NAME Tapan\_2015  
EXPNO 65  
PROCNO 1

F2 - Acquisition Parameters  
Date\_ 20150707  
Time 10.08  
INSTRUM spect  
PROBHD 5 mm PABBO BB-  
PULPROG zg30  
TD 65536  
SOLVENT CDCl3  
NS 16  
DS 2  
SWH 10330.578 Hz  
FIDRES 0.157632 Hz  
AQ 3.1719923 sec  
RG 16  
DW 48.400 usec  
DE 6.50 usec  
TE 292.5 K  
D1 1.00000000 sec

==== CHANNEL f1 =====  
NUC1 1H  
P1 16.00 usec  
PLW1 13.00000000 W  
SFO1 500.1330885 MHz

F2 - Processing parameters  
SI 65536  
SF 500.1299418 MHz  
WDW EM  
SSB 0  
LB 0.30 Hz  
GB 0  
PC 1.00

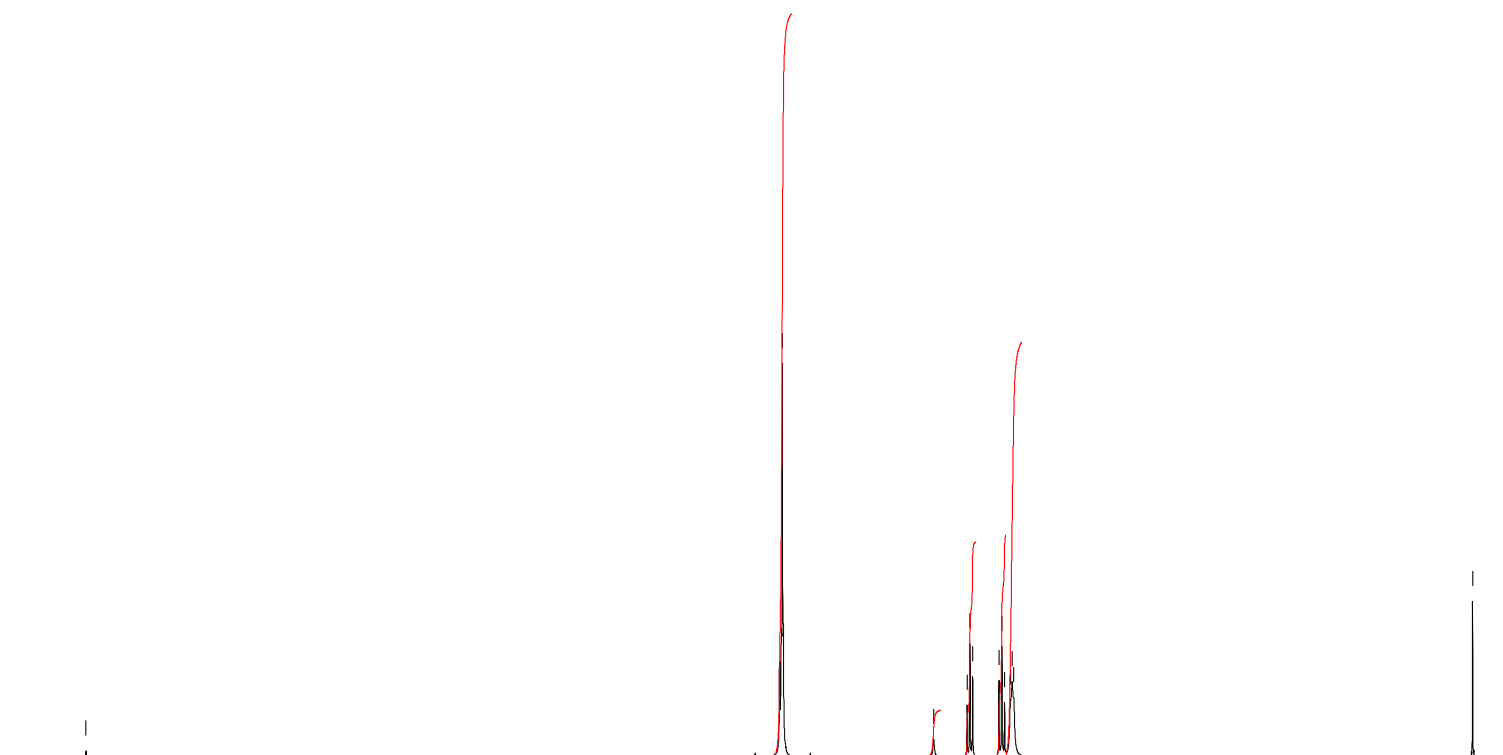

7.5 7.0 6.5 6.0 5.5 5.0 4.5 4.0 3.5 3.0 2.5 2.0 1.5 1.0 0.5 ppm

3.00  
0.19  
0.87  
0.90  
1.68

sample 15  
C13  
cdcl3

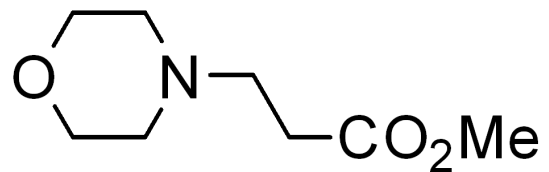

172.50

77.49  
77.23  
76.97

66.62

53.73  
53.20  
51.36

31.64

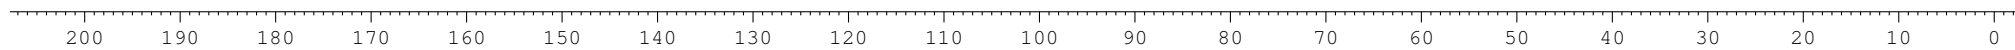

sample 16  
proton  
cdcl3

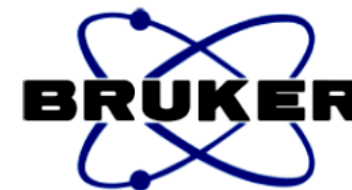

Current Data Parameters  
NAME Tapan\_2015  
EXPNO 66  
PROCNO 1

F2 - Acquisition Parameters  
Date\_ 20150707  
Time 10.28  
INSTRUM spect  
PROBHD 5 mm PABBO BB-  
PULPROG zg30  
TD 65536  
SOLVENT CDCl3  
NS 16  
DS 2  
SWH 10330.578 Hz  
FIDRES 0.157632 Hz  
AQ 3.171923 sec  
RG 16  
DW 48.400 usec  
DE 6.50 usec  
TE 292.5 K  
D1 1.00000000 sec

----- CHANNEL f1 -----  
NUC1 1H  
P1 16.00 usec  
PLW1 13.00000000 W  
SFO1 500.1330885 MHz

F2 - Processing parameters  
SI 65536  
SF 500.1299383 MHz  
WDW EM  
SSB 0  
LB 0.30 Hz  
GB 0  
PC 1.00

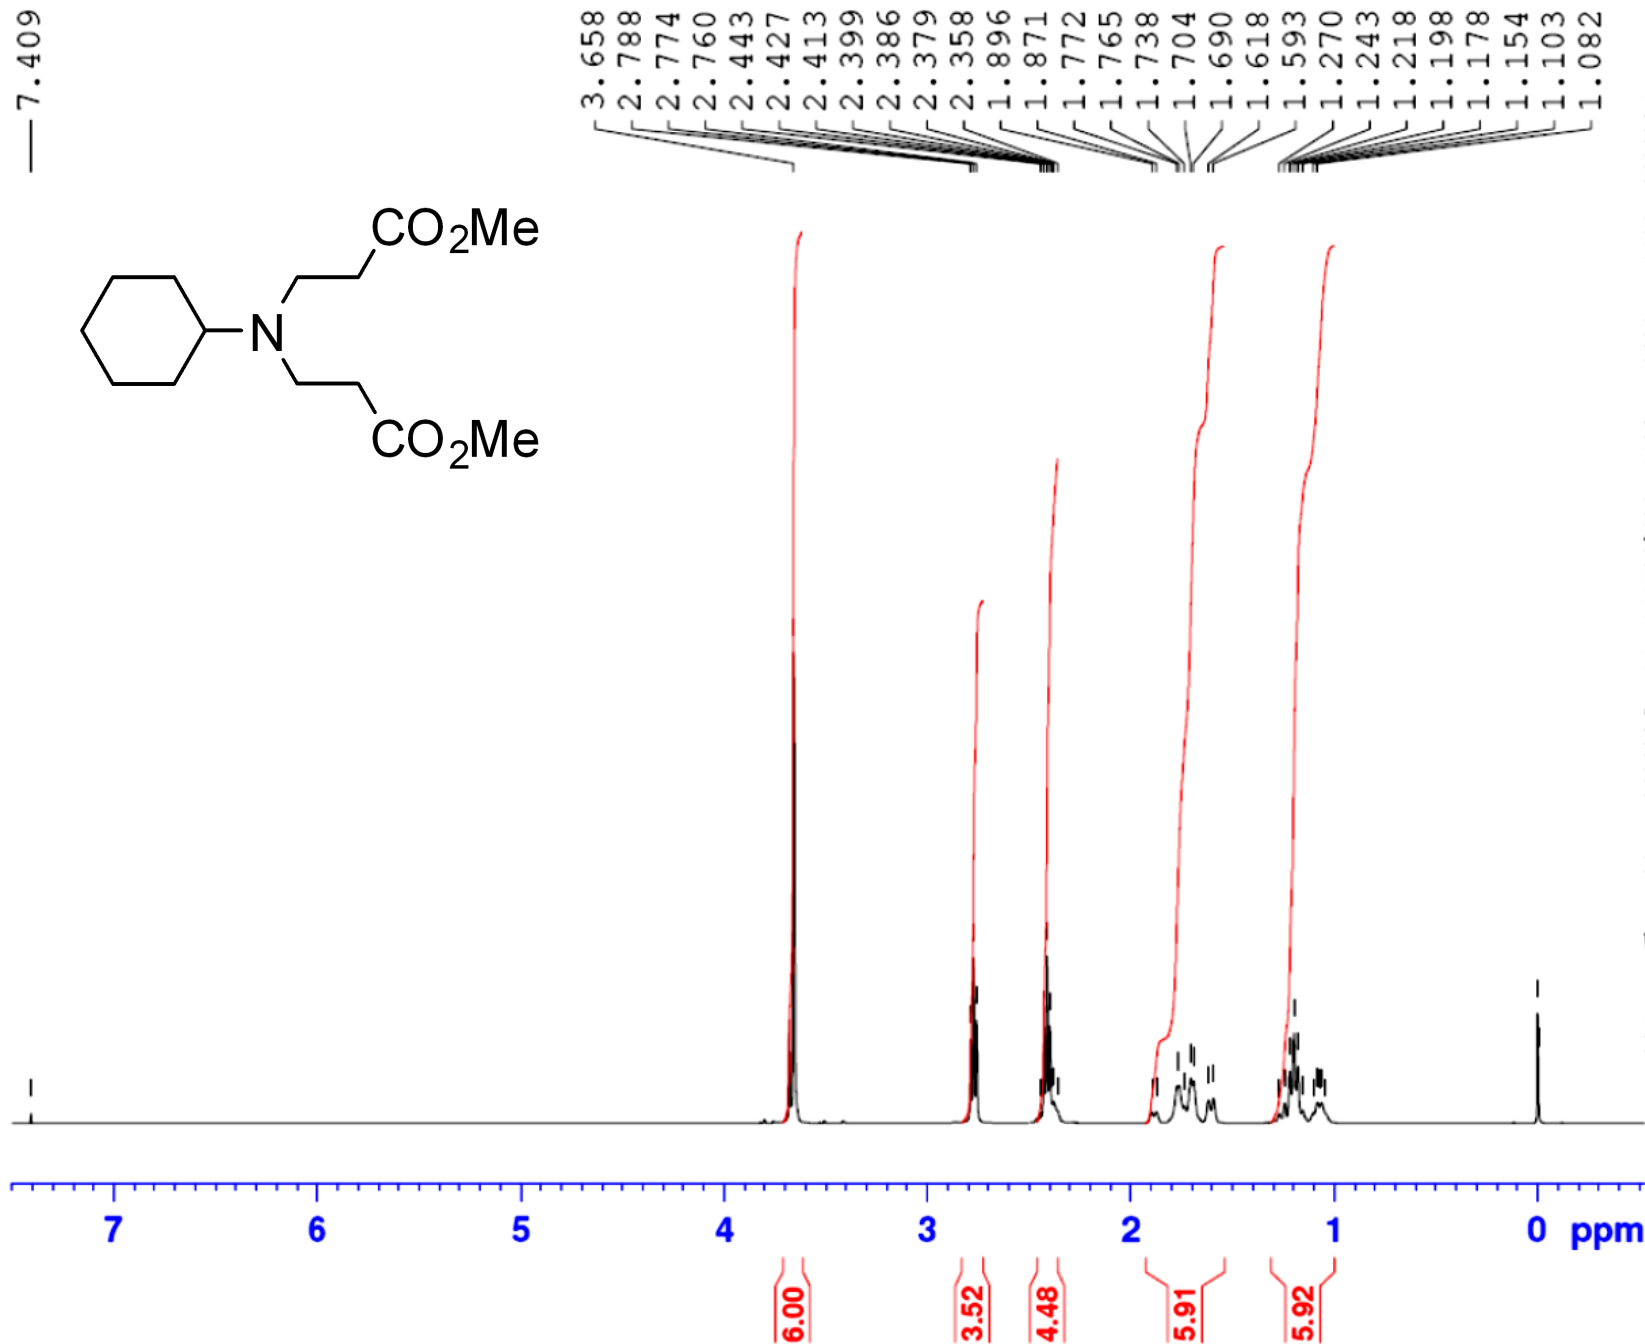

sample 17  
proton  
cdcl3

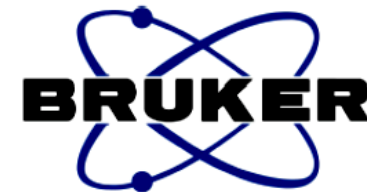

7.364

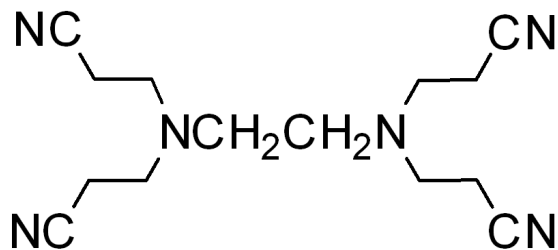

2.939  
2.928  
2.915  
2.866  
2.853  
2.840  
2.702  
2.557  
2.551  
2.543  
2.538  
2.530  
2.525

0.000

Current Data Parameters  
NAME Tapan\_2015  
EXPNO 67  
PROCNO 1

F2 - Acquisition Parameters  
Date\_ 20150707  
Time 10.35  
INSTRUM spect  
PROBHD 5 mm PABBO BB-  
PULPROG zg30  
TD 65536  
SOLVENT CDCl3  
NS 17  
DS 2  
SWH 10330.578 Hz  
FIDRES 0.157632 Hz  
AQ 3.1719923 sec  
RG 28.5  
DW 48.400 usec  
DE 6.50 usec  
TE 292.5 K  
D1 1.00000000 sec

==== CHANNEL f1 =====  
NUC1 1H  
P1 16.00 usec  
PLW1 13.00000000 W  
SFO1 500.1330885 MHz

F2 - Processing parameters  
SI 65536  
SF 500.1299615 MHz  
WDW EM  
SSB 0  
LB 0.30 Hz  
GB 0  
PC 1.00

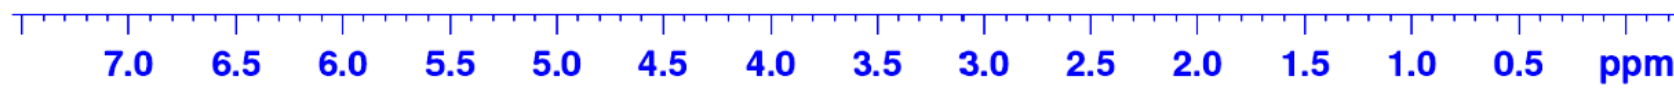

4.00  
3.78  
4.05  
7.92

sample 17  
C13  
cdcl3

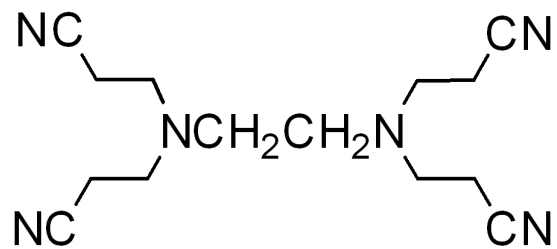

118.93  
118.85

77.49  
77.23  
76.98

52.92  
52.31  
49.64  
49.27  
48.00  
46.38  
44.85  
44.62

18.46  
18.30  
16.82

-0.22

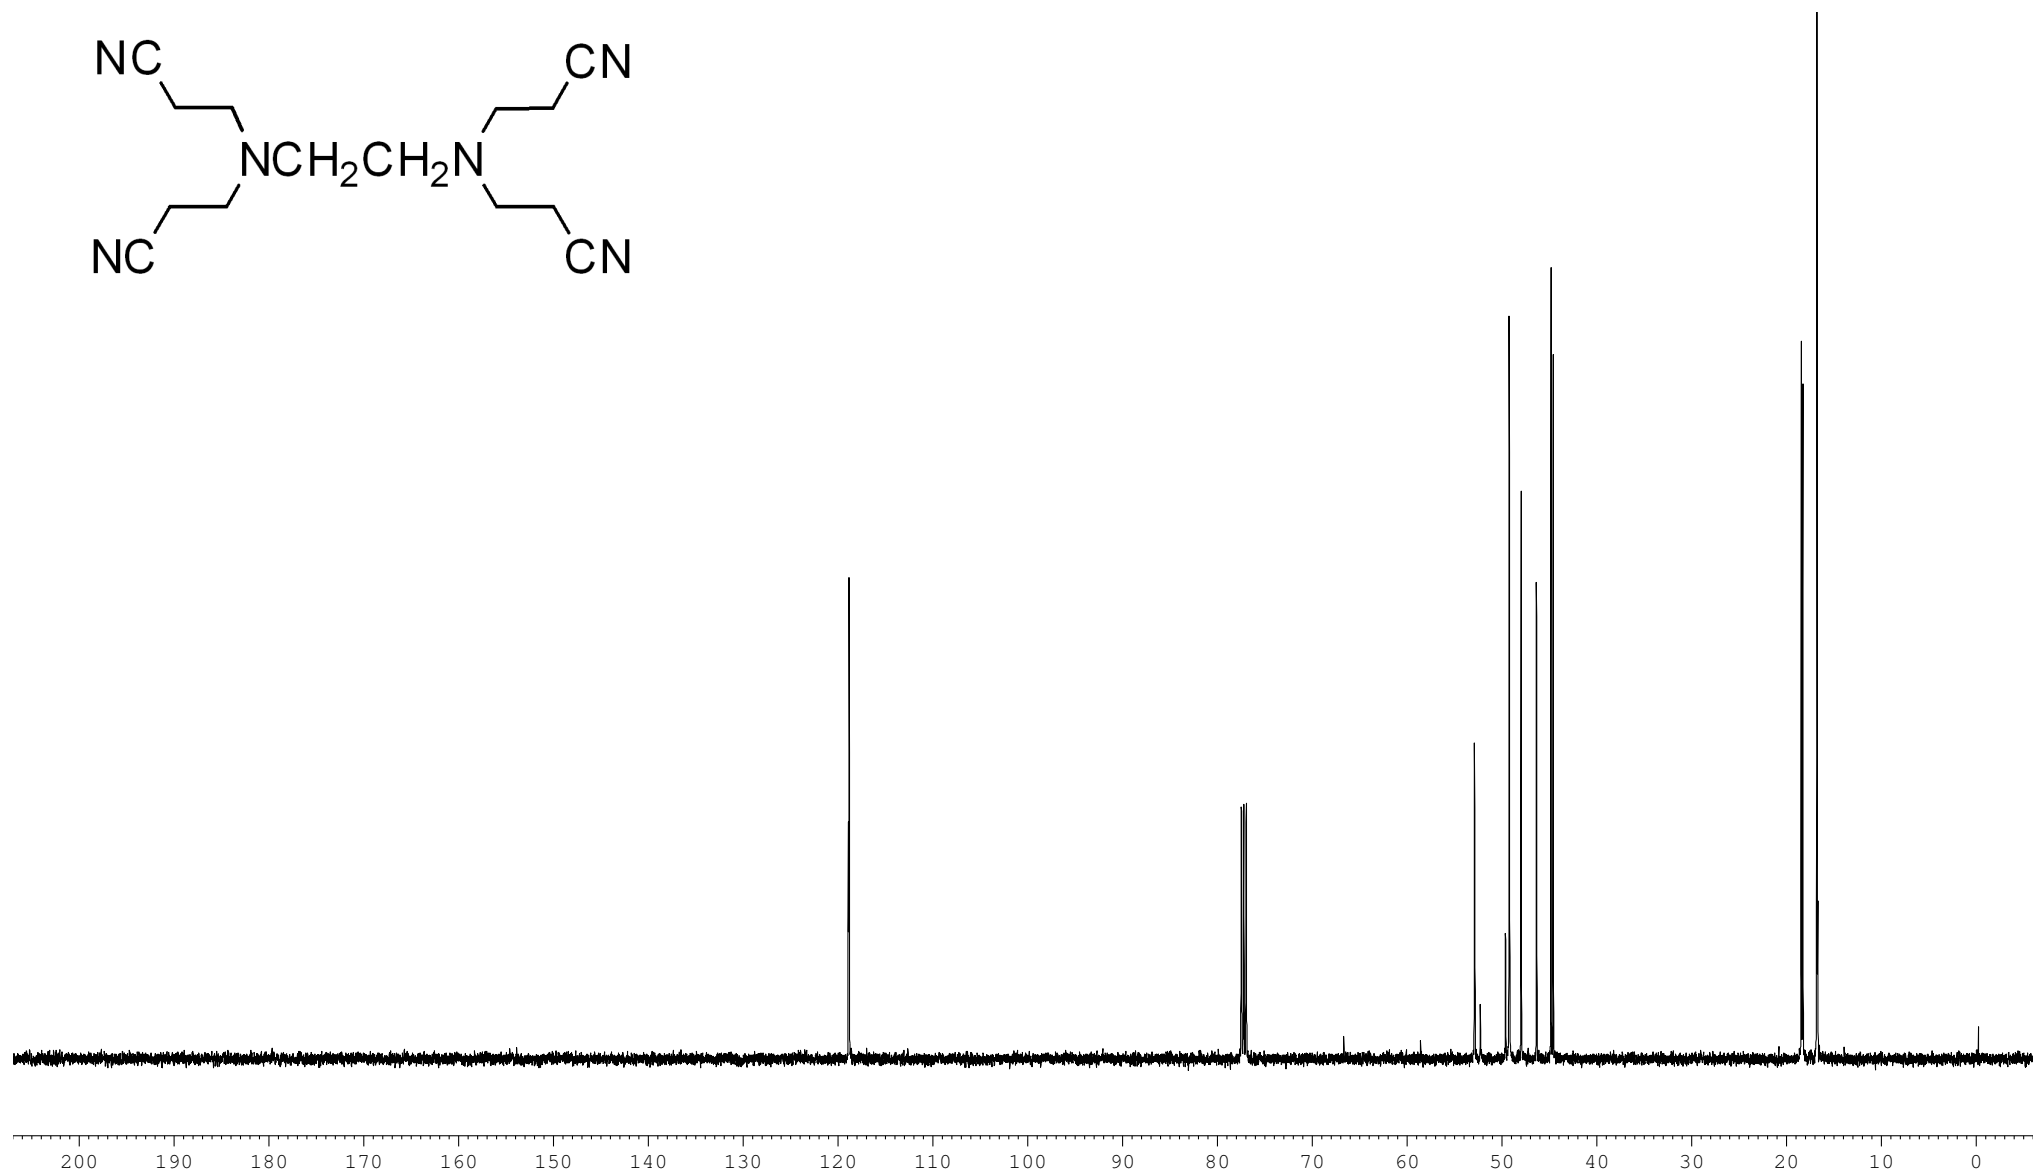

sample 19  
proton  
cdcl3

— 7.313

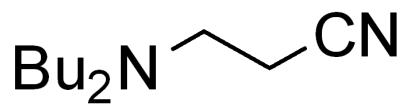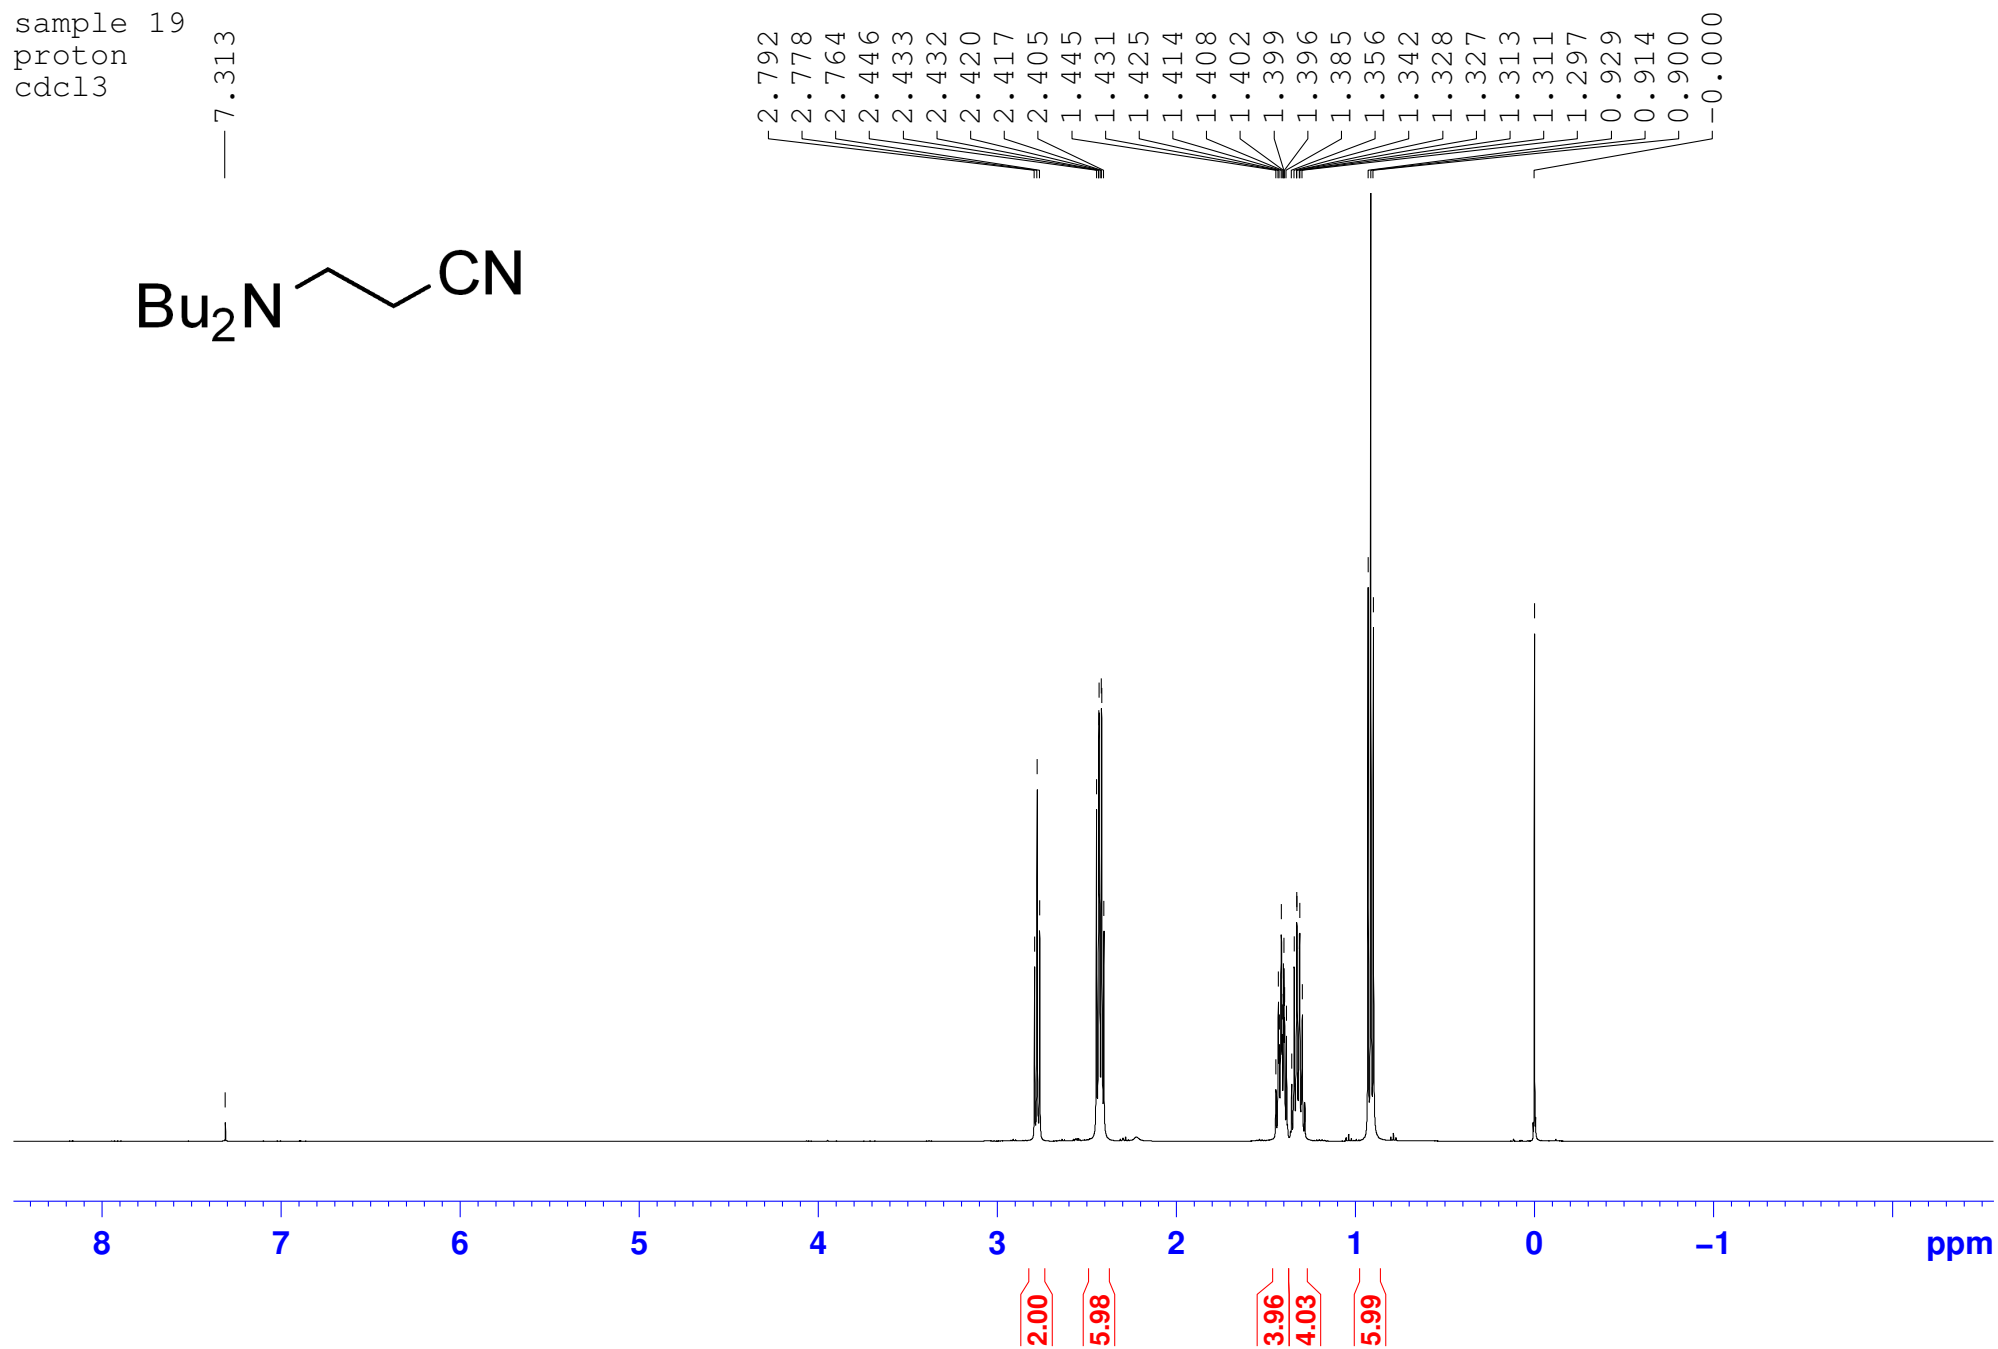

sample 19  
C13  
cdcl3

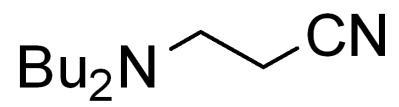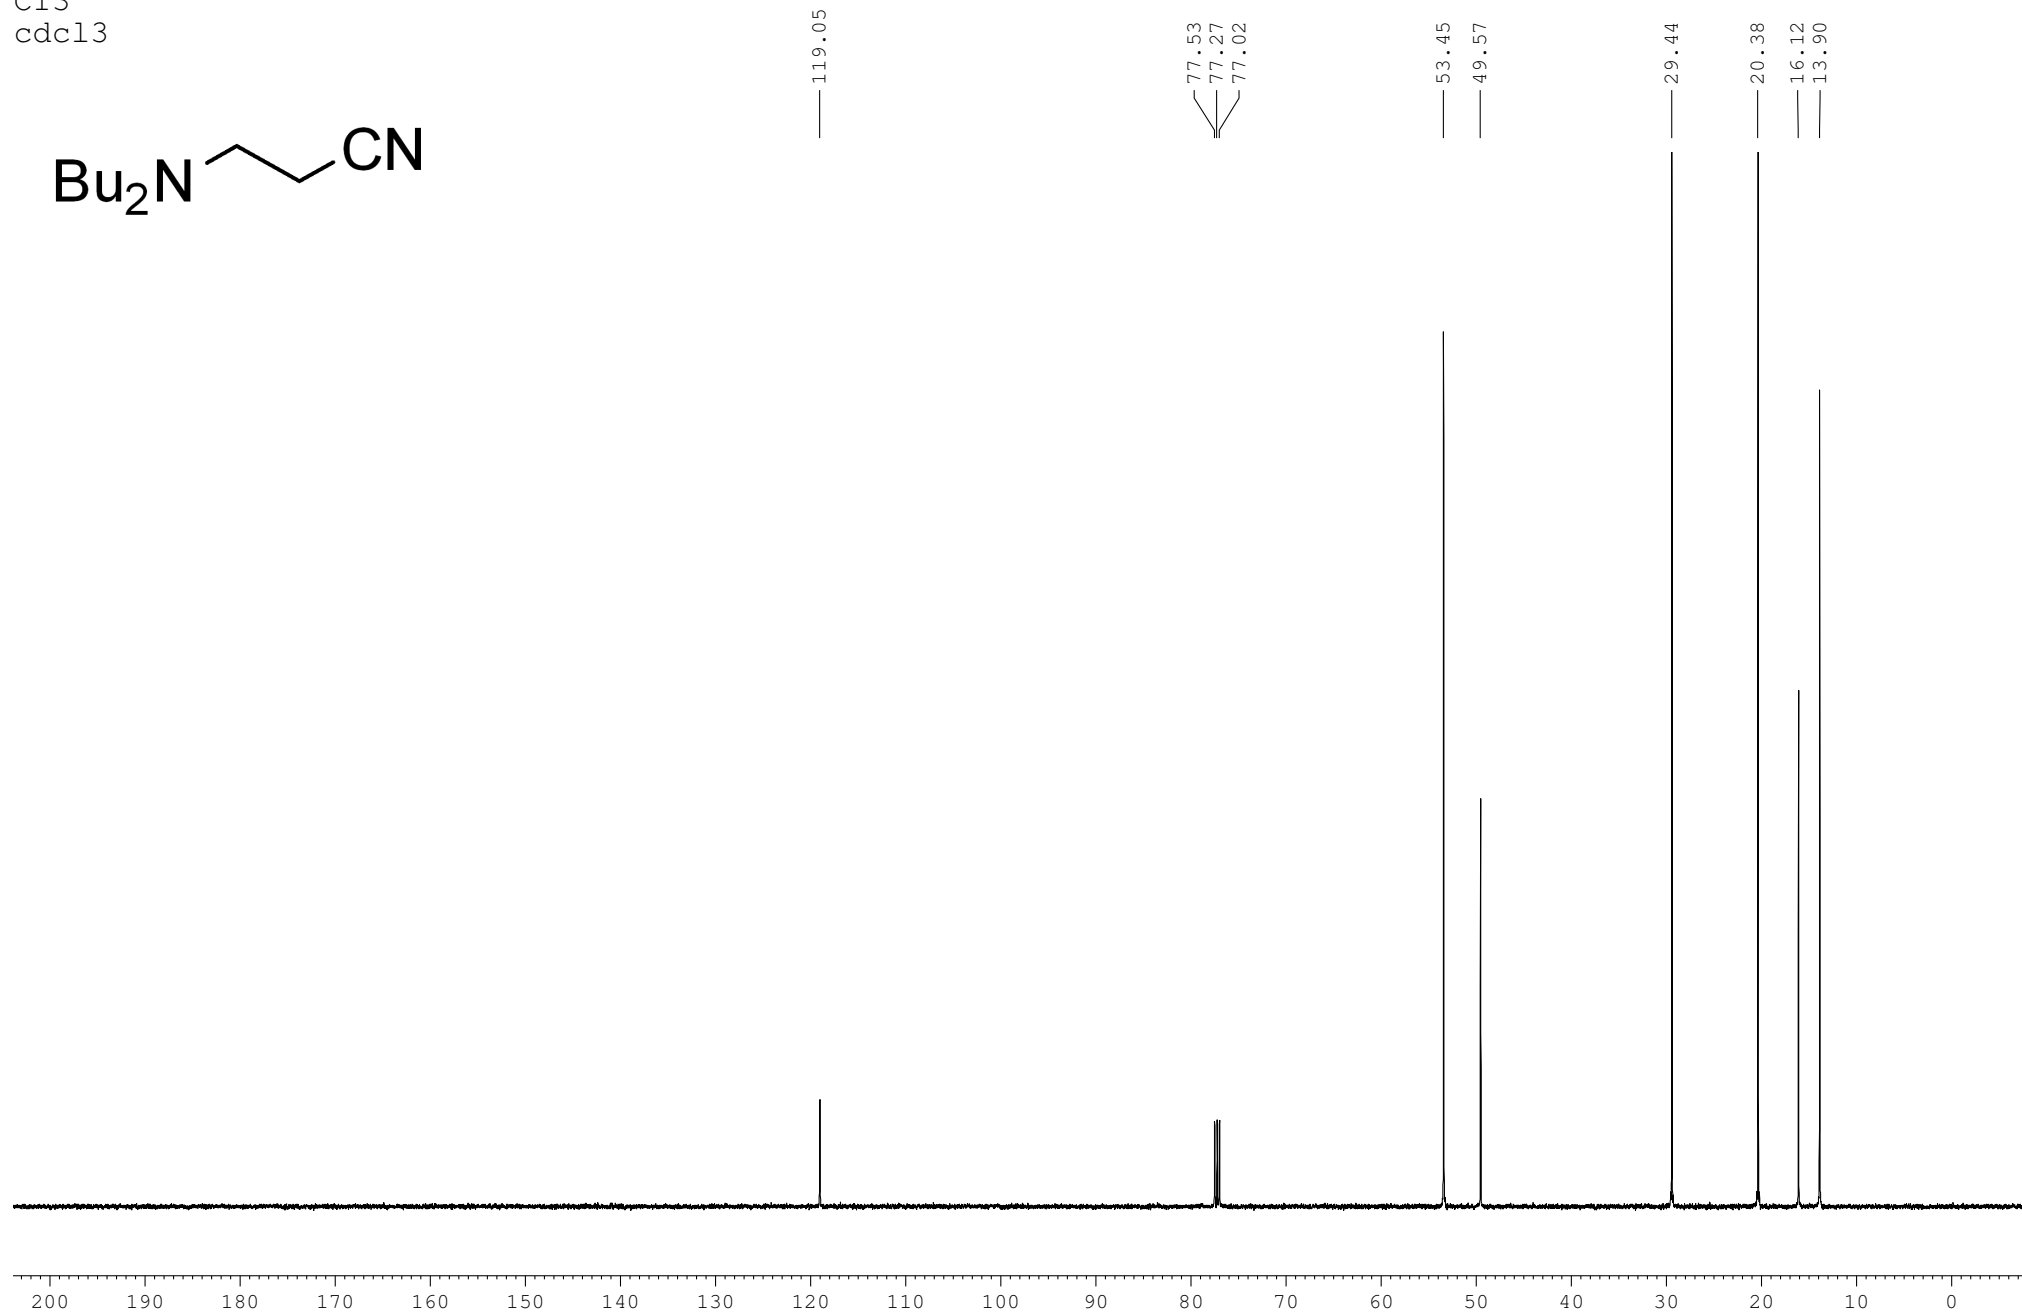

sample 20  
proton  
cdcl3

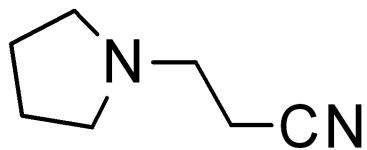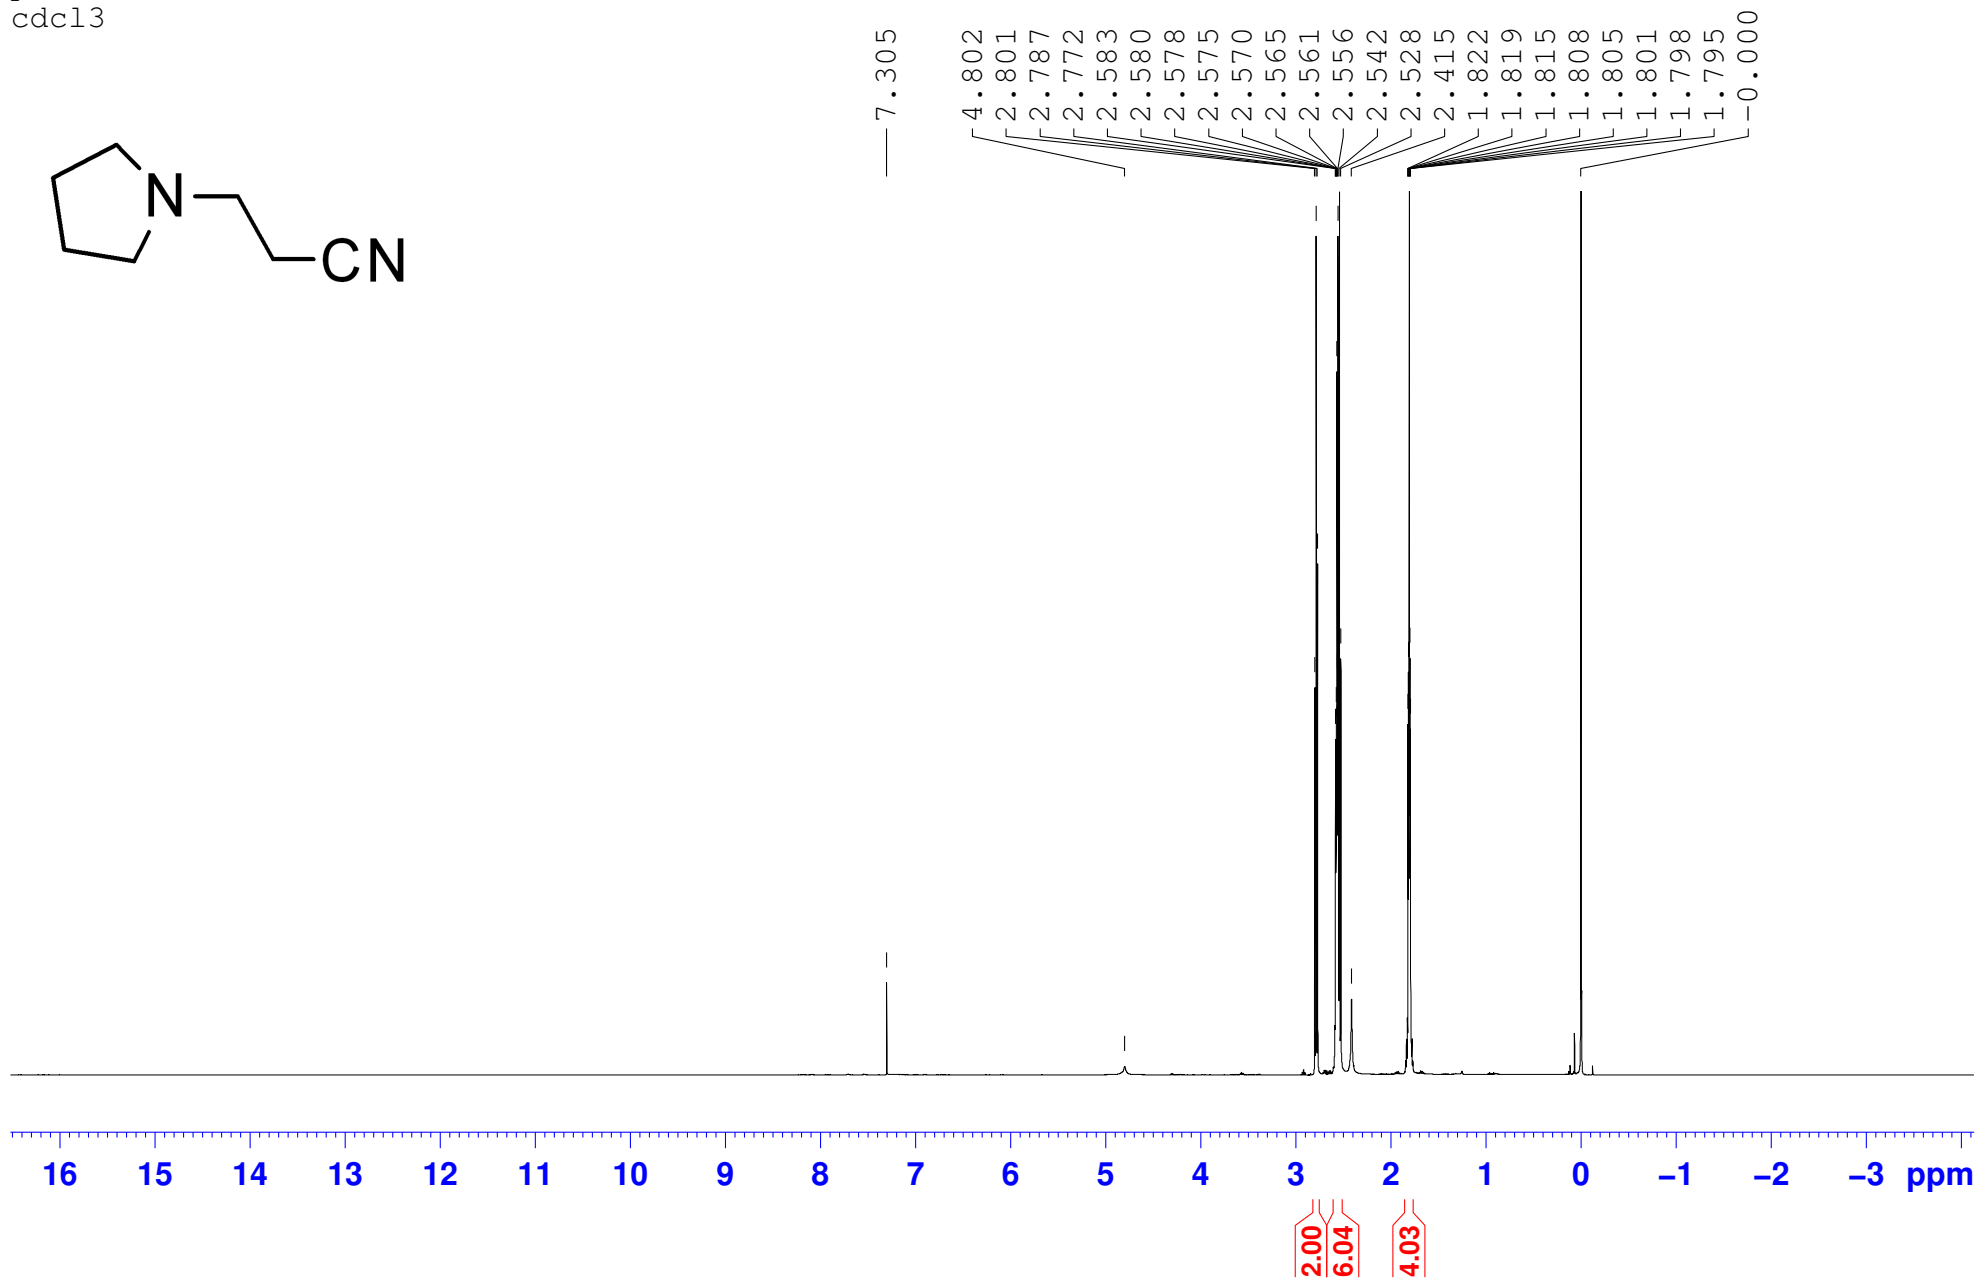



sample 20  
C13  
cdcl3

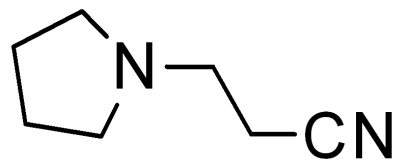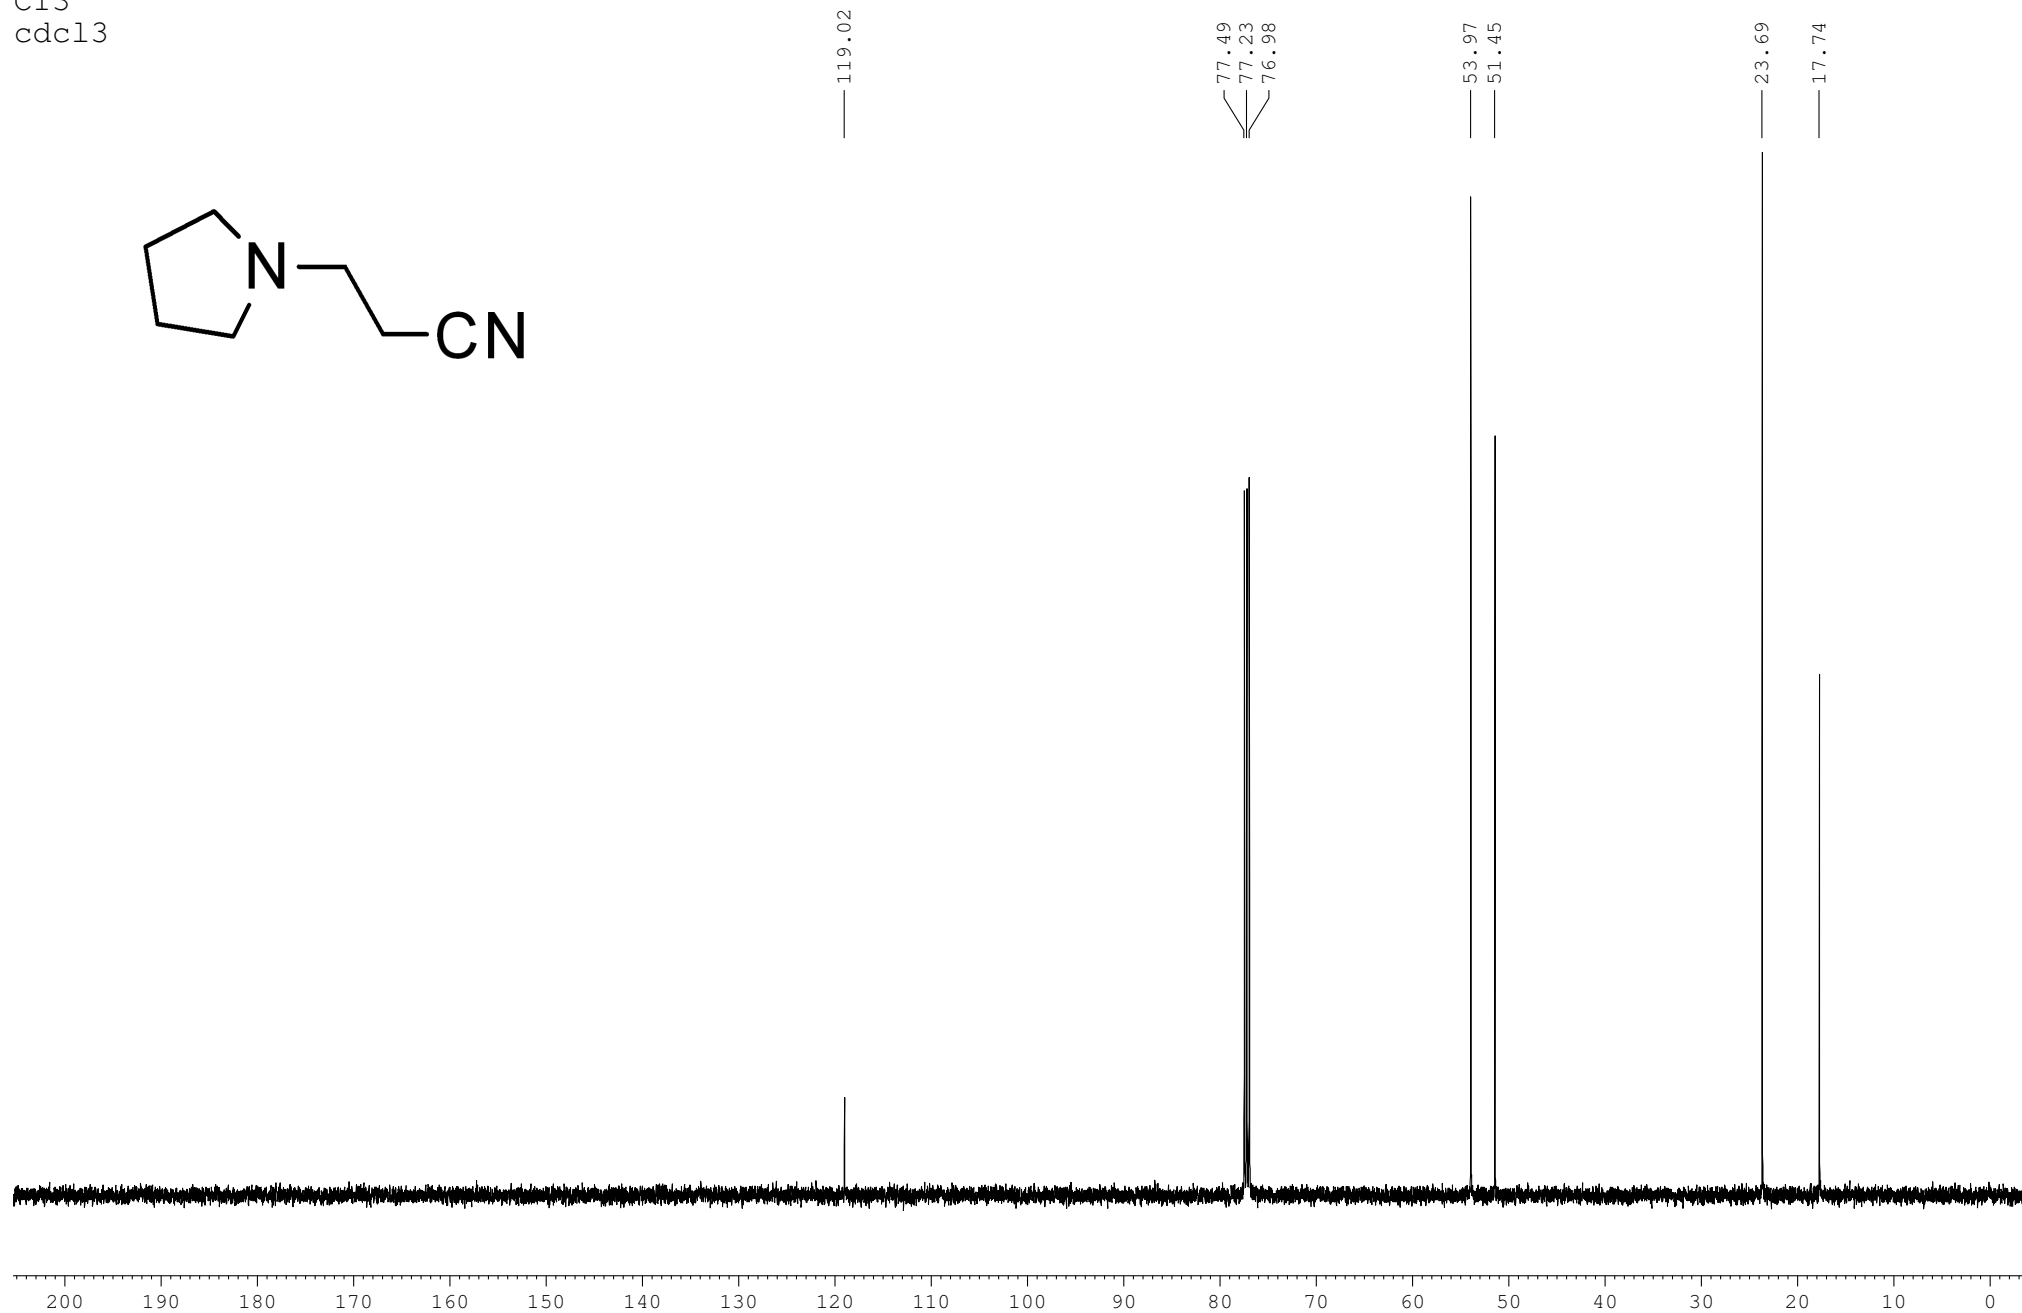

sample 21  
proton  
cdcl3

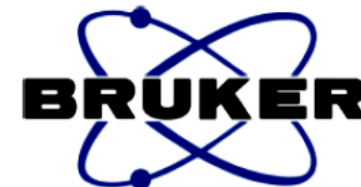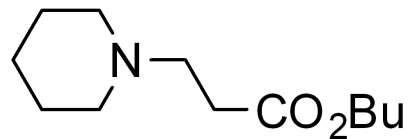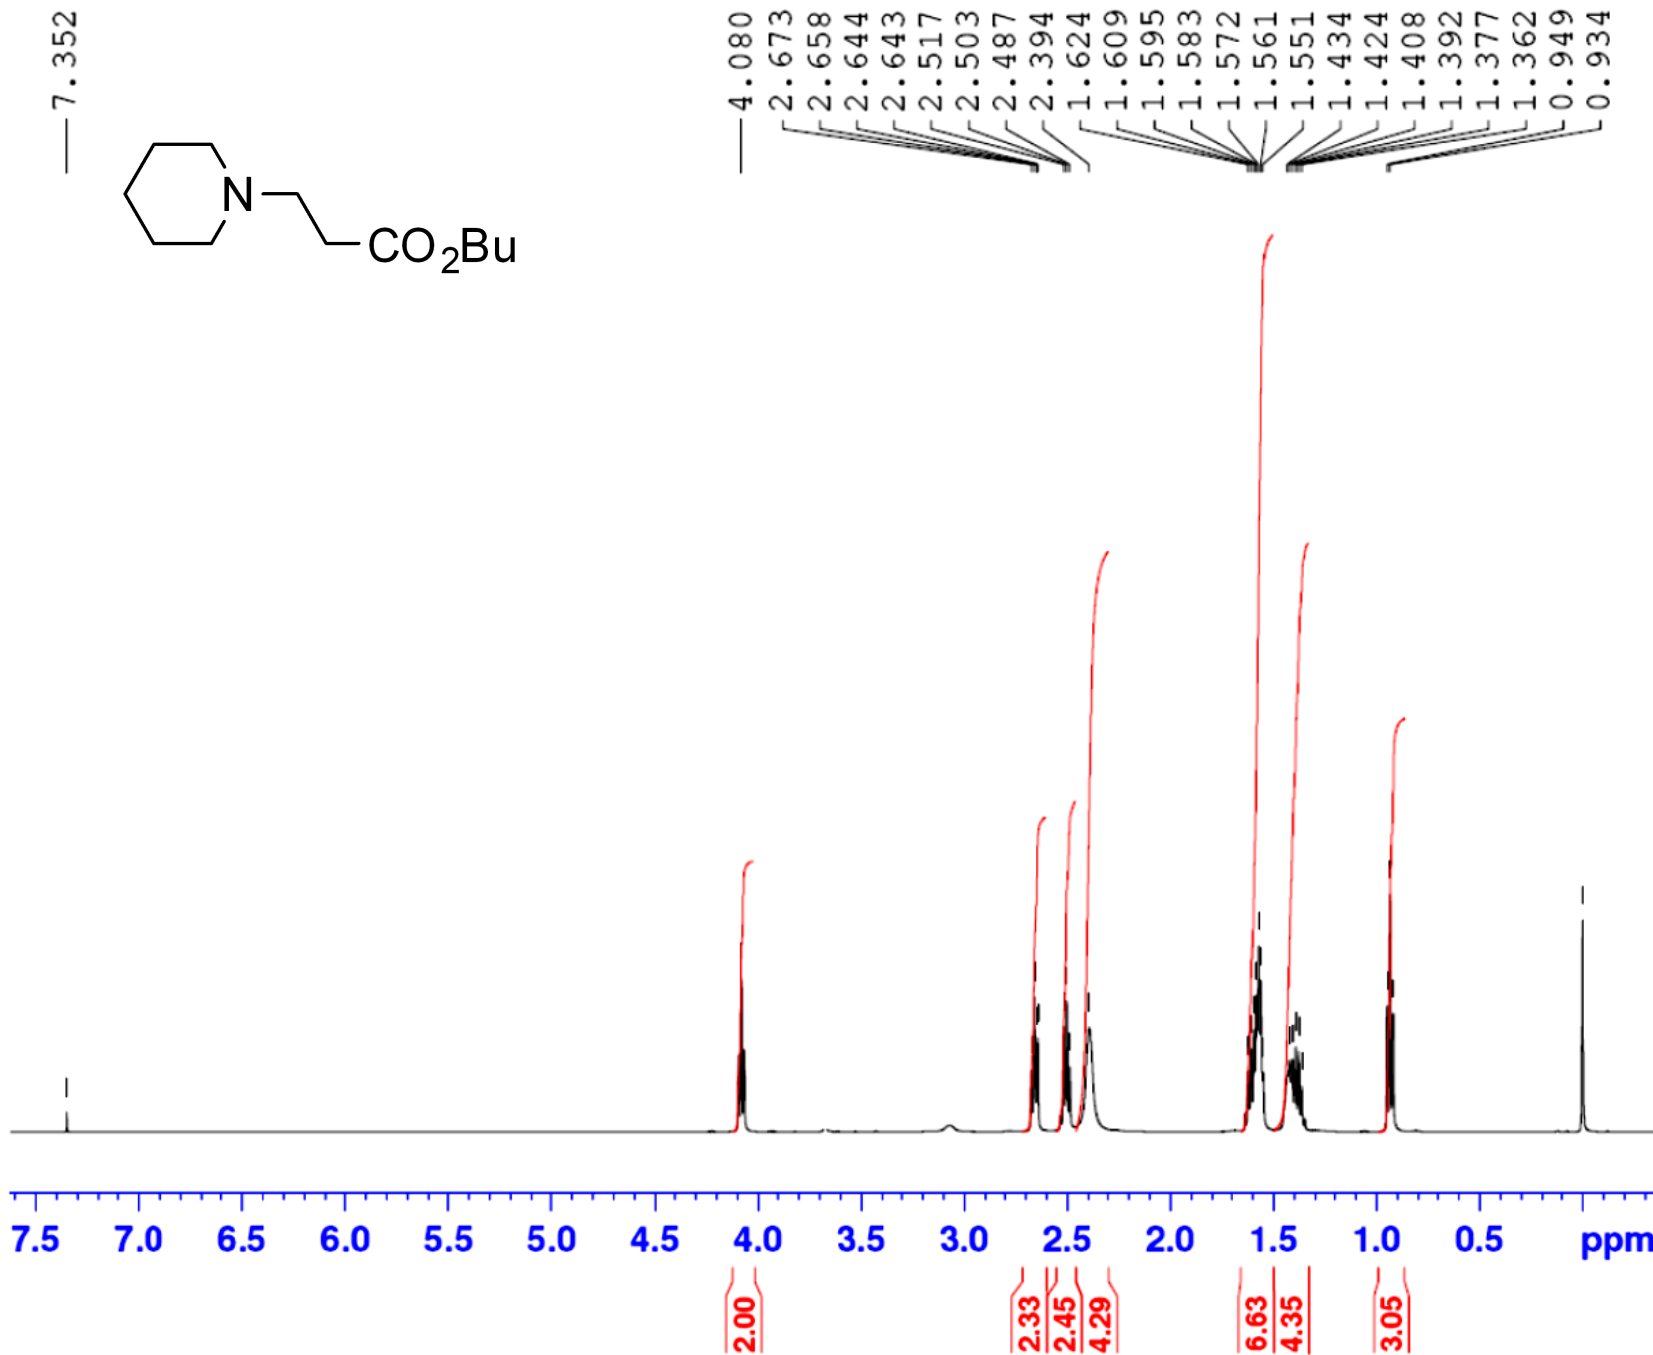

Current Data Parameters  
NAME Tapan\_2015  
EXPNO 70  
PROCNO 1

F2 - Acquisition Parameters  
Date\_ 20150707  
Time 10.50  
INSTRUM spect  
PROBHD 5 mm PABBO BB-  
PULPROG zg30  
TD 65536  
SOLVENT CDCl3  
NS 32  
DS 2  
SWH 10330.578 Hz  
FIDRES 0.157632 Hz  
AQ 3.1719923 sec  
RG 18  
DW 48.400 usec  
DE 6.50 usec  
TE 292.5 K  
D1 1.00000000 sec

----- CHANNEL f1 -----  
NUC1 1H  
P1 16.00 usec  
PLW1 13.00000000 W  
SFO1 500.1330885 MHz

F2 - Processing parameters  
SI 65536  
SF 500.1299676 MHz  
WDW EM  
SSB 0  
LB 0.30 Hz  
GB 0  
PC 1.00

sample 21  
C13  
cdcl3

172.18  
171.85

76.68  
76.42  
76.16

63.31

53.44  
53.37

31.44  
29.82

25.03  
23.42

18.25

12.80

0.12

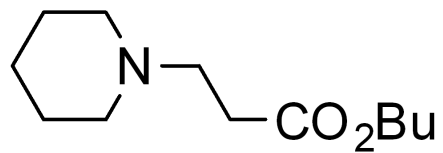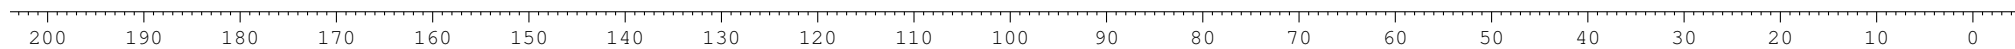

sample 24  
proton  
cdcl3



Current Data Parameters  
NAME Tapan\_2015  
EXPNO 74  
PROCNO 1

F2 - Acquisition Parameters  
Date\_ 20150706  
Time 11.56  
INSTRUM spect  
PROBHD 5 mm PABBO BB-  
PULPROG zg30  
TD 65536  
SOLVENT CDCl3  
NS 32  
DS 2  
SWH 10330.578 Hz  
FIDRES 0.157632 Hz  
AQ 3.1719923 sec  
RG 20.2  
DW 48.400 usec  
DE 6.50 usec  
TE 292.8 K  
D1 1.00000000 sec

===== CHANNEL f1 =====  
NUC1 1H  
P1 16.00 usec  
PLW1 13.00000000 W  
SFO1 500.1330885 MHz

F2 - Processing parameters  
SI 65536  
SF 500.1299791 MHz  
WDW EM  
SSB 0  
LB 0.30 Hz  
GB 0  
PC 1.00

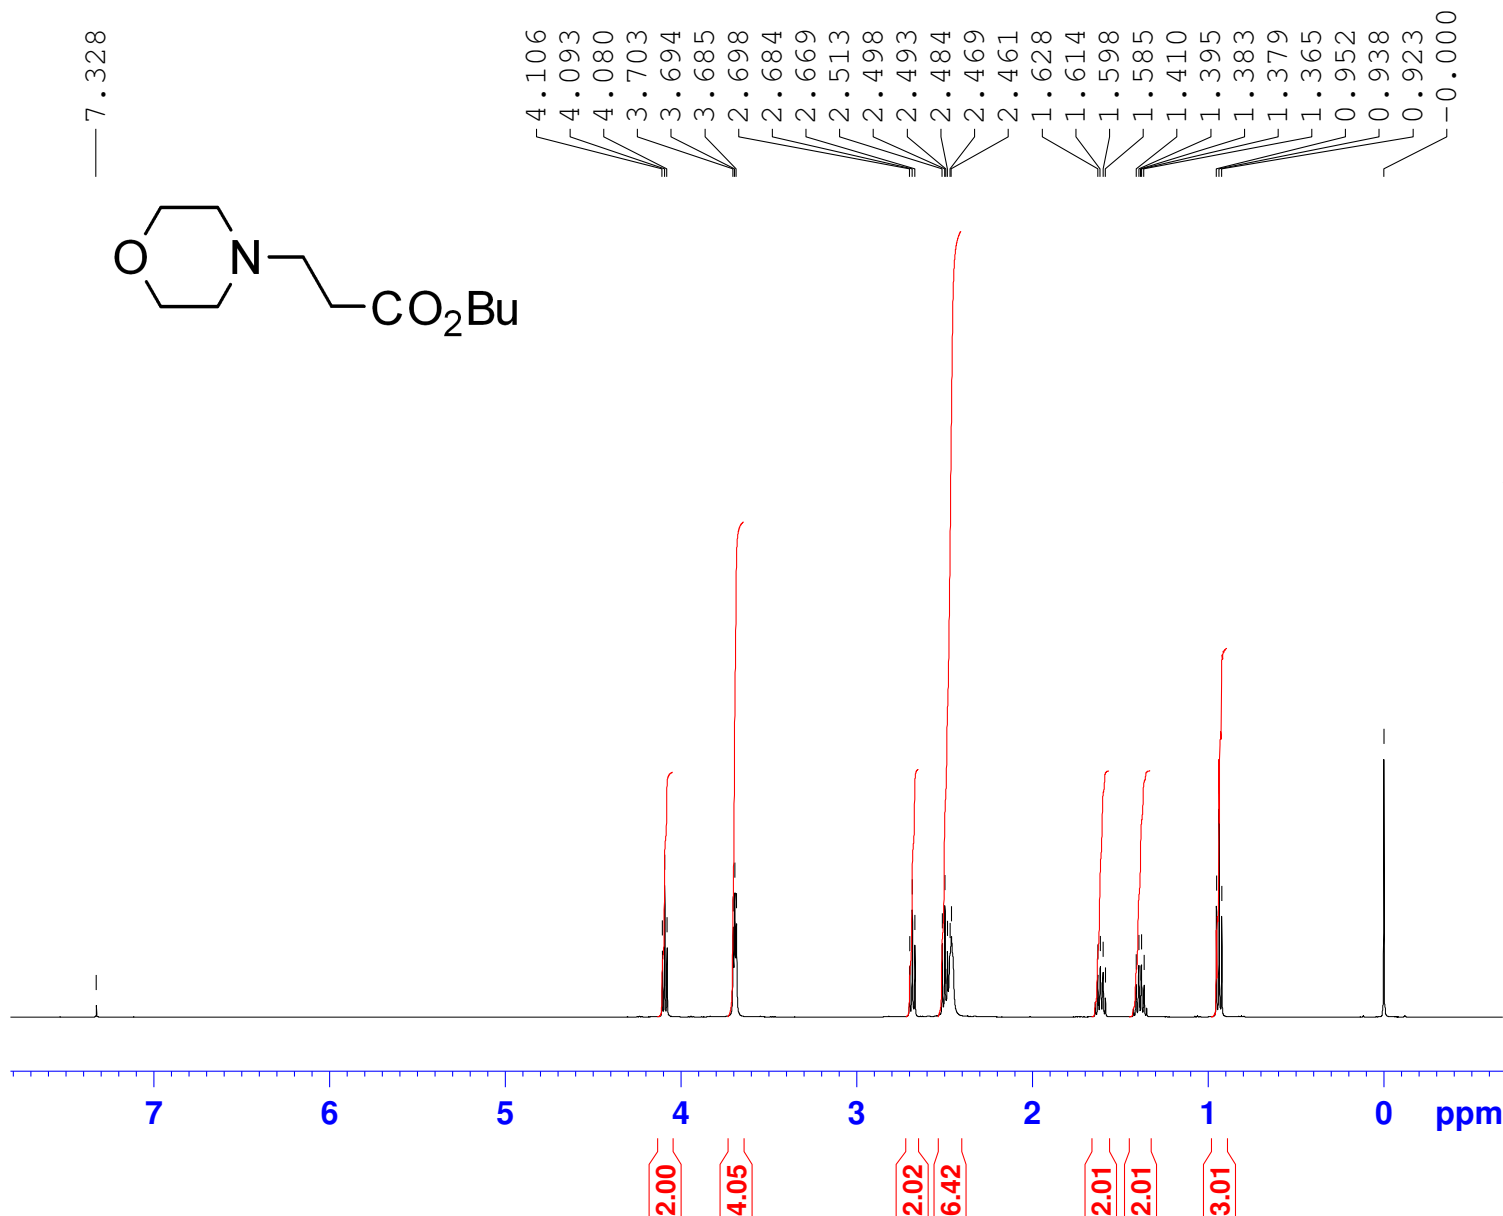

sample 24  
C13  
cdcl3

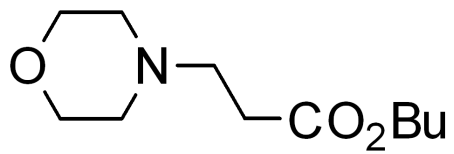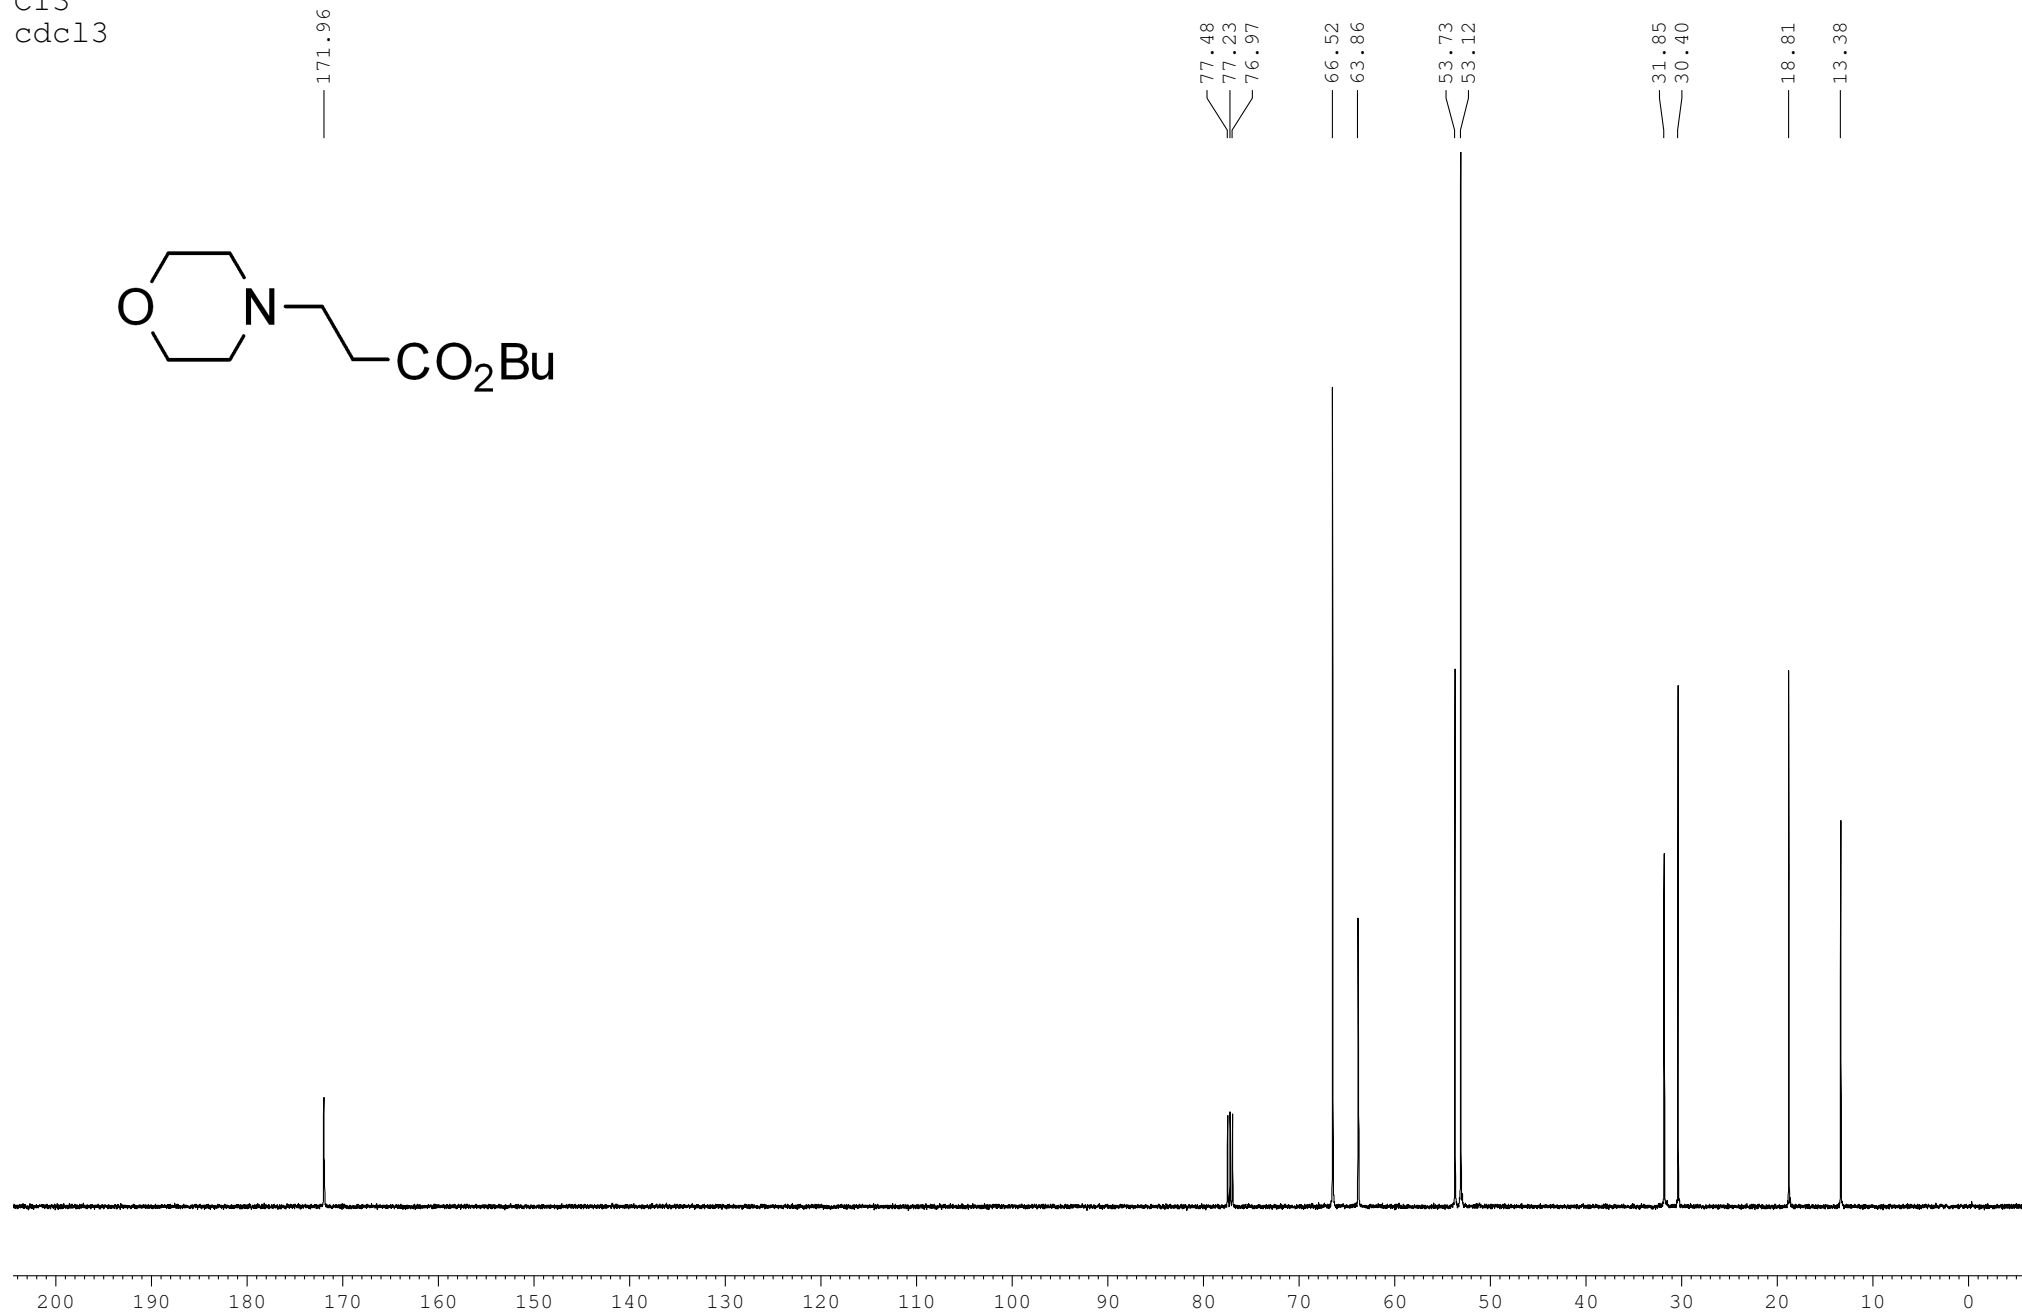

Supplement: c5nj02437d1.pdf [file c5nj02437d1.pdf]
